# Supplementary material
Source: Research Square preprint supplement (doi:10.21203/rs.3.rs-9656537/v1)
Supplement: Supplementary file 1 [file 9850e2db2fc3e4b7de1a4ac4.xlsx]

## Sheet: Table S1 (DEG)
NAME	baseMean	log2FoldChange	lfcSE	stat	pvalue	padj	Gene Name
PDE2A	93.684	-24.9763	3.0035	-8.31573	9.12e-17	6.75e-13	Phosphodiesterase 2A
GOLGB1	82.7922	-24.8093	3.00354	-8.26	1.46e-16	6.75e-13	Golgin B1
ACACA	72.285	-24.6208	3.0036	-8.19711	2.46e-16	7.61e-13	Acetyl-CoA Carboxylase Alpha
TTC7A	68.1009	-24.5406	3.00362	-8.17035	3.08e-16	7.92e-13	Tetratricopeptide Repeat Domain 7A
TNS3	63.1139	-24.4395	3.00366	-8.13657	4.07e-16	8.95e-13	Tensin 3
EYA3	61.8388	-24.3919	3.00367	-8.12069	4.64e-16	8.95e-13	EYA Transcriptional Coactivator and Phosphatase 3
ARHGAP17	82.9695	-24.2408	3.00354	-8.07073	6.99e-16	1.2e-12	Rho GTPase Activating Protein 17
UTP20	80.4357	-9.85323	1.90778	-5.16476	2.41e-07	9.54e-05	UTP20 Small Subunit Processome Component
ALMS1	62.3602	-9.48597	2.46328	-3.85095	0.000117659	0.00526865	Alstrom Syndrome 1
TRIM24	65.9794	-4.98418	1.42857	-3.48893	0.000484956	0.0114252	Tripartite Motif Containing 24
CATHL5	333.201	-4.23839	1.22696	-3.45439	0.000551529	0.0121622	Cathelicidin Antimicrobial Peptide-Like 5
TDRD3	62.4186	-3.62745	1.06567	-3.40393	0.000664239	0.0134973	Tudor Domain Containing 3
REN	360.567	-3.39175	0.819213	-4.14025	3.47e-05	0.00246969	Renin
TGM3	510.378	-2.92604	0.779077	-3.75578	0.000172799	0.00647913	Transglutaminase 3
CLDN1	98.1372	-2.62881	0.902869	-2.91162	0.00359561	0.0345214	Claudin 1
TFRC	402.998	-2.50815	0.526661	-4.76235	1.91e-06	0.000374169	Transferrin Receptor
SMC5	59.0296	-2.38122	0.808846	-2.94397	0.00324027	0.0324922	Structural Maintenance of Chromosomes 5
SLC7A8	984.924	-2.34874	0.737191	-3.18606	0.00144224	0.0206103	Solute Carrier Family 7 Member 8
EIF4E	98.9255	-2.3128	0.736303	-3.1411	0.00168317	0.0224733	Eukaryotic Translation Initiation Factor 4E
NRDC	125.738	-2.24771	0.760905	-2.954	0.00313681	0.0319017	Nardilysin Convertase
LYZ1	86.7216	-2.20634	0.62858	-3.51004	0.000448034	0.0110387	Lysozyme 1
AKAP12	1047.21	-2.19607	0.606192	-3.62274	0.000291504	0.0085934	A-Kinase Anchoring Protein 12
CLINT1	50.2933	-2.15503	0.576805	-3.73615	0.000186859	0.00675809	Clathrin Interactor 1
ATP13A3	94.8572	-2.13654	0.51076	-4.18305	2.88e-05	0.00228404	ATPase 13A3
PTX3	2962.43	-2.09085	0.4862	-4.30038	1.71e-05	0.00168842	Pentraxin 3
SECISBP2L	96.1559	-2.05168	0.527605	-3.88866	0.000100799	0.00474461	SECIS Binding Protein 2 Like
KIF2A	71.7587	-2.01295	0.656783	-3.06486	0.00217771	0.0262208	Kinesin Family Member 2A
HOMER1	52.2619	-1.95372	0.5167	-3.78115	0.000156108	0.00604399	Homer Scaffold Protein 1
PPARGC1A	526.746	-1.92085	0.54441	-3.52831	0.000418221	0.010686	Peroxisome Proliferator-Activated Receptor Gamma Coactivator 1 Alpha
CEP83	59.574	-1.91839	0.594522	-3.22677	0.00125194	0.0191829	Centrosomal Protein 83
SORBS2	58.3415	-1.90346	0.596575	-3.19064	0.00141957	0.0204185	Sorbin And SH3 Domain Containing 2
HNRNPH3	341.492	-1.90307	0.495944	-3.83727	0.00012441	0.00541341	Heterogeneous Nuclear Ribonucleoprotein H3
GK	334.047	-1.86311	0.649398	-2.86898	0.00411797	0.0373443	Glycerol Kinase
RTN4	1590.47	-1.84642	0.470561	-3.92387	8.71e-05	0.00437429	Reticulon 4
RPS6KA3	49.834	-1.83392	0.484154	-3.78789	0.000151933	0.00595702	Ribosomal Protein S6 Kinase A3
MME	340.106	-1.81675	0.502289	-3.61695	0.000298096	0.00873812	Membrane Metallo-Endopeptidase
PLCB4	82.6462	-1.79702	0.605333	-2.96865	0.00299114	0.031074	Phospholipase C Beta 4
MAN1A2	53.7338	-1.78299	0.531332	-3.35571	0.000791629	0.0148772	Mannosidase Alpha Class 1A Member 2
SHLD3	46.5863	-1.7824	0.435506	-4.09271	4.26e-05	0.00279085	Shieldin Complex Subunit 3
GPAM	718.818	-1.72478	0.584946	-2.94861	0.00319207	0.0322716	Glycerol-3-Phosphate Acyltransferase, Mitochondrial
CSDE1	231.468	-1.72274	0.476862	-3.61265	0.000303083	0.0088008	Cold Shock Domain Containing E1
SLC25A46	50.0273	-1.71716	0.532246	-3.22626	0.00125419	0.0191829	Solute Carrier Family 25 Member 46
SMAD2	222.026	-1.70763	0.468485	-3.64501	0.000267385	0.00829616	SMAD Family Member 2
FYTTD1	107.541	-1.70318	0.579068	-2.94124	0.00326897	0.0326524	U5 snRNP-Associated 102 kDa Protein (FYTTD1)
PALM2	104.707	-1.70038	0.435801	-3.90174	9.55e-05	0.00455343	Paralemmin 2
UGT1A6	180.252	-1.68087	0.558193	-3.01127	0.00260155	0.0287617	UDP Glucuronosyltransferase Family 1 Member A6
ERO1A	68.3273	-1.6797	0.611843	-2.74532	0.00604519	0.0473086	Endoplasmic Reticulum Oxidoreductase 1 Alpha
ANKRD28	111.817	-1.66499	0.350569	-4.74938	2.04e-06	0.000389137	Ankyrin Repeat Domain 28
NCKAP1	284.881	-1.65115	0.587204	-2.81188	0.00492523	0.0419895	NCK Associated Protein 1
BTC	300.76	-1.64298	0.613631	-2.67748	0.00741789	0.0537736	Betacellulin
SRRM1	739.399	-1.63857	0.429269	-3.81712	0.000135018	0.00563647	Serine/Arginine Repetitive Matrix 1
FAM241B	53.5772	-1.63757	0.572808	-2.85884	0.00425187	0.0381291	Family With Sequence Similarity 241 Member B
KIF5B	694.571	-1.63028	0.423175	-3.85249	0.000116921	0.00526586	Kinesin Family Member 5B
UGGT2	55.2165	-1.62617	0.523118	-3.10861	0.00187968	0.0239187	UDP-Glucose Glycoprotein Glucosyltransferase 2
DDX21	754.53	-1.62214	0.388301	-4.17753	2.95e-05	0.00231102	DEAD-Box Helicase 21
PIK3R3	72.5051	-1.61832	0.452253	-3.57836	0.000345757	0.00955868	Phosphoinositide-3-Kinase Regulatory Subunit 3
PRPS2	63.2169	-1.61825	0.495805	-3.26389	0.00109893	0.0179264	Phosphoribosyl Pyrophosphate Synthetase 2
DNAJC25	143.01	-1.61794	0.377317	-4.28801	1.8e-05	0.00172982	DnaJ Heat Shock Protein Family (Hsp40) Member C25
DTNA	48.3397	-1.6132	0.47989	-3.36161	0.000774886	0.0147419	Dystrobrevin Alpha
PPP6R3	558.509	-1.61071	0.486827	-3.30858	0.000937701	0.0164422	Protein Phosphatase 6 Regulatory Subunit 3
RRP15	186.063	-1.59694	0.470051	-3.39737	0.000680366	0.0136666	Ribosomal RNA Processing 15 Homolog
RGS5	218.948	-1.59554	0.359361	-4.43995	9e-06	0.00111198	Regulator of G Protein Signaling 5
CSNK1A1	110.958	-1.59014	0.449389	-3.53845	0.000402479	0.0104848	Casein Kinase 1 Alpha 1
PENK	172.358	-1.58914	0.58782	-2.70344	0.0068625	0.0511147	Proenkephalin
TNRC6A	273.668	-1.58838	0.567583	-2.7985	0.005134	0.0429702	Trinucleotide Repeat Containing Adaptor 6A
LRP6	175.469	-1.58446	0.595618	-2.66019	0.00780962	0.0554041	Low Density Lipoprotein Receptor-Related Protein 6
NAA25	105.251	-1.58354	0.449051	-3.52642	0.000421222	0.0107207	N-Alpha-Acetyltransferase 25
DNAJC27	50.2895	-1.57999	0.492538	-3.20785	0.00133732	0.0198182	DnaJ Heat Shock Protein Family (Hsp40) Member C27
SLMAP	74.1517	-1.57545	0.57514	-2.73924	0.00615812	0.0478765	Sarcolemma Associated Protein
MYO6	67.2162	-1.57347	0.539406	-2.91704	0.00353369	0.0340752	Myosin VI
ELOVL7	153.716	-1.57129	0.415212	-3.78431	0.000154134	0.00598256	Elongation of Very Long Chain Fatty Acids Protein 7
TRMT6	205.205	-1.57097	0.400383	-3.92366	8.72e-05	0.00437429	tRNA Methyltransferase 6
DAAM1	326.082	-1.56825	0.453412	-3.45877	0.000542646	0.0120443	Dishevelled Associated Activator of Morphogenesis 1
PREPL	107.176	-1.5629	0.350705	-4.45645	8.33e-06	0.00106386	Prolyl Endopeptidase Like
AKT3	108.407	-1.5558	0.513843	-3.02778	0.0024636	0.0280455	AKT Serine/Threonine Kinase 3
PPP1R12A	148.681	-1.55499	0.435019	-3.57452	0.00035087	0.00958796	Protein Phosphatase 1 Regulatory Subunit 12A
EIF4G3	182.351	-1.54294	0.508382	-3.03499	0.00240542	0.0276389	Eukaryotic Translation Initiation Factor 4 Gamma 3
ZC3H8	72.5169	-1.53676	0.500155	-3.07257	0.00212222	0.0258346	Zinc Finger CCCH-Type Containing 8
ZNF655	96.7373	-1.53123	0.553761	-2.76514	0.00568976	0.0456837	Zinc Finger Protein 655
DPP8	116.413	-1.52922	0.53492	-2.85878	0.00425275	0.0381291	Dipeptidyl Peptidase 8
NKAPD1	107.299	-1.52113	0.369986	-4.11132	3.93e-05	0.00266545	NF-κB Activating Protein Domain Containing 1
SMURF2	71.5375	-1.5203	0.433583	-3.50636	0.000454285	0.0111191	SMAD Specific E3 Ubiquitin Protein Ligase 2
TREM2	245.835	1.50342	0.321808	4.6718	2.99e-06	0.000506852	Triggering Receptor Expressed on Myeloid Cells 2
RASGRP4	244.29	1.50471	0.318839	4.71935	2.37e-06	0.000435118	RAS Guanyl Releasing Protein 4
C2	450.895	1.51039	0.286608	5.26989	1.37e-07	7.03e-05	Complement Component 2
SELENBP1	572.052	1.52089	0.403848	3.76599	0.000165892	0.00626575	Selenium Binding Protein 1
TIMD4	96.5834	1.55742	0.474244	3.284	0.00102345	0.0173358	T Cell Immunoglobulin and Mucin Domain Containing 4
CFB	481.749	1.5731	0.490719	3.20571	0.00134728	0.0198976	Complement Factor B
SYT17	101.012	1.58488	0.481643	3.29056	0.000999867	0.0170862	Synaptotagmin 17
LTBP2	2887.49	1.61074	0.435159	3.7015	0.00021433	0.0072831	Latent Transforming Growth Factor Beta Binding Protein 2
LRRC20	95.3971	1.61388	0.465418	3.4676	0.000525134	0.0118489	Leucine Rich Repeat Containing 20
MST1	208.931	1.63161	0.47315	3.44839	0.000563934	0.0123046	Macrophage Stimulating 1
GRIN2D	222.997	1.6799	0.523616	3.20827	0.00133536	0.0198182	Glutamate Ionotropic Receptor NMDA Type Subunit 2D
CSDC2	3419.72	1.68931	0.612236	2.75924	0.00579358	0.0462768	Cold Shock Domain Containing C2
LPXN	69.7672	1.69989	0.483733	3.5141	0.000441242	0.0109411	Leupaxin
FOXO6	172.108	1.70525	0.545284	3.12727	0.0017644	0.0229625	Forkhead Box O6
TMEM42	75.8366	1.70646	0.562326	3.03464	0.00240821	0.0276389	Transmembrane Protein 42
KIF25	57.9738	1.70934	0.592152	2.88665	0.00389366	0.0361257	Kinesin Family Member 25
IQANK1	118.767	1.72006	0.623676	2.75794	0.00581676	0.04639	IQ Motif and Ankyrin Repeat Containing 1
LIMK2	71.8148	1.72215	0.59332	2.90256	0.0037013	0.0350354	LIM Domain Kinase 2
ARVCF	147.678	1.85972	0.630952	2.94748	0.00320379	0.0323256	Armadillo Repeat Gene Deleted in Velocardiofacial Syndrome
ELP5	119.189	1.86044	0.67954	2.7378	0.00618521	0.0479973	Elongator Acetyltransferase Complex Subunit 5
RNF112	149.108	1.89094	0.502254	3.7649	0.000166614	0.00627769	Ring Finger Protein 112
NRG2	55.2717	1.89823	0.685728	2.7682	0.00563663	0.0454221	Neuregulin 2
ASB10	149.881	1.90184	0.648515	2.9326	0.00336134	0.0330738	Ankyrin Repeat and SOCS Box Containing 10
SLC4A11	137.081	1.93029	0.479777	4.0233	5.74e-05	0.00341121	Solute Carrier Family 4 Member 11
THBS4	1259.85	1.94542	0.64542	3.0142	0.00257661	0.0286562	Thrombospondin 4
NECAP2	68.6606	2.08322	0.684988	3.04126	0.00235593	0.0272822	NECAP Endocytosis Associated Protein 2
S100A5	53.12	2.08366	0.639654	3.25749	0.00112404	0.0181824	S100 Calcium Binding Protein A5
PLD2	91.7725	2.1836	0.598907	3.64597	0.000266381	0.00829616	Phospholipase D2
PSTPIP1	67.9963	2.24883	0.749874	2.99894	0.00270923	0.0295149	Proline-Serine-Threonine Phosphatase Interacting Protein 1
CCL21	463.608	2.35262	0.67263	3.49765	0.000469373	0.0112658	C-C Motif Chemokine Ligand 21
PLEKHA6	81.5386	2.46028	0.822201	2.9923	0.0027688	0.0299737	Pleckstrin Homology Domain Containing A6
PITX1	118.542	2.52614	0.794355	3.18011	0.00147217	0.020881	Paired Like Homeodomain 1
GCLC	78.6449	5.40989	1.68205	3.21624	0.00129882	0.0194987	Glutamate-Cysteine Ligase Catalytic Subunit
UBAP2	51.2002	9.0633	2.00707	4.5157	6.31e-06	0.000869547	Ubiquitin Associated Protein 2
IP6K2	65.5007	9.41889	1.97442	4.77047	1.84e-06	0.000368739	Inositol Hexakisphosphate Kinase 2
MIER2	99.9201	10.0281	1.91351	5.24068	1.6e-07	7.19e-05	MIER Transcriptional Regulator 2
NUP85	100.283	10.0333	1.93149	5.19459	2.05e-07	8.34e-05	Nucleoporin 85
PRKACA	46.6803	23.1688	3.00376	7.71326	1.23e-14	1.72e-11	Protein Kinase cAMP-Activated Catalytic Subunit Alpha
AKAP13	66.8124	23.6703	3.00358	7.88067	3.26e-15	5.03e-12	A-Kinase Anchoring Protein 13
GNB1	143.993	24.7422	3.00336	8.23815	1.75e-16	6.75e-13	G Protein Subunit Beta 1

## Sheet: Table S2 (Pathways)
Ingenuity Canonical Pathways	-log(p-value)	Ratio	z-score	Molecules
Hepatic Fibrosis Signaling Pathway	2.27	0.0504	-3.5	ACVR2B,AKT3,CACNB2,CHUK,CSNK1A1,IL1RL1,ITGAM,ITGAX,ITGB1,LRP6,PIK3CA,PIK3R3,PRKACA,RALA,RHOBTB1,RHOT1,SMAD2,TFRC,TNFRSF11B,VCAM1,WNT9B
Transcriptional Regulatory Network in Embryonic Stem Cells	1.84	0.061	-3.162	ACVR2B,AKT3,FGFR3,PIK3CA,PIK3R3,RALA,RIF1,SMAD2,TRIM24,WNT9B
Protein Ubiquitination Pathway	2.46	0.0586	-3	ANAPC5,BIRC6,DNAJB13,DNAJB7,DNAJC25,DNAJC27,DNAJC28,FBXW7,HSPA14,HSPA2,HSPD1,SMURF2,UBE2Q2,USP25,USP31,XIAP
Regulation of the Epithelial Mesenchymal Transition by Growth Factors Pathway	1.1	0.0469	-3	AKT3,CHUK,FGFR3,PIK3CA,PIK3R3,RALA,SMAD2,TNFRSF11B,ZEB2
B Cell Receptor Signaling	0	0.0142	-3	AKT3,CHUK,CSK,MEF2C,PIK3CA,PIK3R3,RALA,SYNJ2,VAV3
CREB Signaling in Neurons	1.15	0.0379	-2.985	ADCY5,ADGRA3,ADGRB1,ADORA2A,AKT3,CACNB2,FFAR2,FGFR3,GHR,GNB1,GPR17,GRIA1,GRIA4,GRIN2D,HTR2A,PIK3CA,PIK3R3,PLCB4,PLCH2,PRKACA,PTGFR,RALA,RPS6KA1
Role of Tissue Factor in Cancer	5.38	0.0918	-2.982	ACVR2B,AKT3,BLK,CHUK,EIF4E,F2,FGR,ITGB1,LIMK2,PIK3CA,PIK3R3,PPM1J,PPP2R3A,RALA,RBL1,RPS6KA1,RPS6KA3,RPS6KC1,TNFRSF11B
NGF Signaling	1.77	0.0667	-2.828	AKT3,CHUK,PIK3CA,PIK3R3,RALA,RPS6KA1,RPS6KA3,RPS6KC1
Insulin Receptor Signaling	1.42	0.0571	-2.828	AKT3,EIF4E,PIK3CA,PIK3R3,PPP1R12A,PRKACA,RALA,SYNJ2
HMGB1 Signaling	1.4	0.0539	-2.828	AKT3,KAT2B,PIK3CA,PIK3R3,RALA,RHOBTB1,RHOT1,TNFRSF11B,VCAM1
Role of NFAT in Regulation of the Immune Response	0	0.0106	-2.828	AKT3,CHUK,CSNK1A1,GNB1,HLA-DQA2,KPNA1,MEF2C,PIK3CA,PIK3R3,PLCB4,RALA
Major pathway of rRNA processing in the nucleolus and cytosol	1.88	0.0591	-2.714	DDX21,GNL3,RBM28,RPL18,RPP30,RPS12,TEX10,UTP20,WDR36,WDR75,XRN2
Growth Hormone Signaling	2.5	0.0986	-2.646	GHR,PIK3CA,PIK3R3,RPS6KA1,RPS6KA3,RPS6KC1,SOCS7
FLT3 Signaling in Hematopoietic Progenitor Cells	2.16	0.0854	-2.646	AKT3,EIF4E,PIK3CA,PIK3R3,RALA,RPS6KA1,RPS6KA3
3-phosphoinositide Biosynthesis	1.55	0.0526	-2.646	PIK3CA,PIK3R3,PIKFYVE,PPM1J,PPP1R12A,PPP1R12B,PPP2R2B,PPP2R3A,PTPN12,SYNJ2,TNS3
IL-6 Signaling	1.2	0.0543	-2.646	AKT3,CHUK,IL1RL1,PIK3CA,PIK3R3,RALA,TNFRSF11B
Fcgamma receptor (FCGR) dependent phagocytosis	0.863	0.0446	-2.646	ABI1,ACTG1,ARPC1A,FGR,NCKAP1,PIK3CA,VAV3
Cardiac Hypertrophy Signaling (Enhanced)	3.01	0.0517	-2.6	ACVR2B,ADCY5,AKAP13,AKT3,CACNB2,CHUK,EIF4E,FGFR3,GDE1,GHR,GNB1,IL17RE,IL1RL1,ITGAM,ITGAX,ITGB1,MAP3K20,MEF2C,PDE2A,PDE3A,PIK3CA,PIK3R3,PLCB4,PLCH2,PRKACA,RALA,TNFRSF11B,WNT9B
Apelin Endothelial Signaling Pathway	2.78	0.078	-2.53	ADCY5,AKT3,GNB1,MEF2C,PIK3CA,PIK3R3,PLCB4,PRKAA2,PRKAB2,RALA,VCAM1
MSP-RON Signaling in Cancer Cells Pathway	2.3	0.0714	-2.53	AKT3,ELF2,ITGB1,MST1,PIK3CA,PIK3R3,RALA,RPS6KA3,SMAD2,TRIM24
ILK Signaling	2.04	0.0597	-2.53	ACTG1,AKT3,ITGB1,MYH11,PIK3CA,PIK3R3,PPM1J,PPP1R12A,PPP2R2B,PPP2R3A,RHOBTB1,RHOT1
Human Embryonic Stem Cell Pluripotency	1.31	0.0498	-2.53	ACVR2B,AKT3,FGFR3,NR5A2,PIK3CA,PIK3R3,RALA,RIF1,SMAD2,WNT9B
Hematoma Resolution Signaling Pathway	0.777	0.0388	-2.53	F2,GRIN2D,IL1RL1,ITGAM,MMP15,NDUFV1,PRKAA2,PRKAB2,TREM2,TUBA4A
Sertoli Cell-Sertoli Cell Junction Signaling	4.39	0.0782	-2.524	ACTG1,AKT3,AR,CDH13,CLDN1,CLINT1,IL1RL1,ITGB1,LAMA2,LAMB1,MAP3K20,PIK3CA,PIK3R3,RALA,RPS6KA1,TJAP1,TNFRSF11B,TUBA4A,TUBB4B
Apelin Pancreas Signaling Pathway	2.83	0.13	-2.449	EIF2AK3,PIK3CA,PIK3R3,PRKAA2,PRKAB2,PRKACA
Virus Entry via Endocytic Pathways	1.81	0.0678	-2.449	ACTG1,AP4E1,FOLR1,ITGB1,PIK3CA,PIK3R3,RALA,TFRC
NF-κB Activation by Viruses	1.71	0.0769	-2.449	AKT3,CHUK,ITGB1,PIK3CA,PIK3R3,RALA
Fc Epsilon RI Signaling	0.987	0.0508	-2.449	AKT3,PIK3CA,PIK3R3,RALA,SYNJ2,VAV3
G-Protein Coupled Receptor Signaling	0.821	0.0341	-2.449	ADCY5,ADGRA3,ADGRB1,ADORA2A,AKT3,CHUK,FFAR2,FOXO6,GDE1,GNB1,GPR17,HTR2A,KCNQ3,MEF2C,PDE2A,PDE3A,PIK3CA,PIK3R3,PLCB4,PREX2,PRKACA,PTGFR,RALA,RPS6KA1
Hereditary Breast Cancer Signaling	0.758	0.0435	-2.449	AKT3,PIK3CA,PIK3R3,RAD51D,RALA,XPC
FXR/RXR Activation	0.399	0.0321	-2.449	AKT3,EIF2AK3,NR5A2,PPARGC1A,PRKAA2,PRKAB2
CD28 Signaling in T Helper Cells	0	0.0135	-2.449	AKT3,ARPC1A,CHUK,CSK,HLA-DQA2,PIK3CA,PIK3R3
RHO GTPase cycle	9.65	0.0867	-2.402	ABI1,ACTG1,AKAP12,AKAP13,ARAP2,ARHGAP17,CCP110,CDC42BPA,CSK,DAAM1,DOCK3,DOCK4,DST,FAM13A,FGD2,ITGB1,KTN1,MCF2L,MYO6,NCKAP1,PEAK1,PIK3CA,PIK3R3,PLD2,PLEKHG1,PLEKHG3,PLXNB1,PREX2,RALGAPA1,RHOBTB1,SRRM1,SWAP70,TFRC,TIAM2,TPM4,UACA,VANGL2,VAV3,WWP2
Senescence Pathway	3.66	0.0669	-2.357	ACVR2B,AKT3,ANAPC5,CACNB2,CHUK,EIF4E,ELF2,HIPK2,KAT2B,PDK3,PHF1,PIK3CA,PIK3R3,PPM1J,PPP2R2B,PPP2R3A,RALA,RBL1,SMAD2,STING1
Activation of NMDA receptors and postsynaptic events	4.03	0.119	-2.333	GRIA1,GRIA4,GRIN2D,PRKAA2,PRKAB2,PRKACA,RPS6KA1,RPS6KA3,TUBA4A,TUBB4B
ABRA Signaling Pathway	3.05	0.0978	-2.333	ACTG1,DMD,ITGB1,LIMK2,MEF2C,MYH11,PPARGC1A,TAGLN,TPM4
Signaling by VEGF	2.56	0.0833	-2.333	ABI1,ACTG1,AKT3,MAPKAP1,NCKAP1,PIK3CA,PRKACA,PRR5L,VAV3
L1CAM interactions	2.14	0.072	-2.333	ACTG1,ITGB1,KCNQ3,LAMB1,NCAM1,RPS6KA1,RPS6KA3,TUBA4A,TUBB4B
Gα12/13 Signaling	1.97	0.0677	-2.333	AKT3,CDH13,CHUK,F2,MEF2C,PIK3CA,PIK3R3,RALA,VAV3
NAD Signaling Pathway	1.65	0.0596	-2.333	AKT3,EIF2AK3,HSPD1,PIK3CA,PIK3R3,PPARGC1A,PRKAA2,PRKAB2,SLC29A4
IL-33 Signaling Pathway	1.18	0.0486	-2.333	AKT3,CHUK,IL1RL1,PIK3CA,PIK3R3,PRKACA,RPS6KA1,RPS6KC1,VCAM1
NF-κB Signaling	0	0.0158	-2.333	AKT3,CHUK,FGFR3,GHR,PIK3CA,PIK3R3,PRKACA,RALA,TNFRSF11B
T Cell Receptor Signaling	0	0.0146	-2.333	AKT3,CHUK,CSK,HLA-DQA2,ITGB1,PIK3CA,PIK3R3,RALA,VAV3
Systemic Lupus Erythematosus in B Cell Signaling Pathway	0	0.0124	-2.333	AKT3,CSK,FGR,FOXO6,PIK3CA,PIK3R3,RALA,STING1,SYNJ2
Neuroinflammation Signaling Pathway	1.03	0.041	-2.309	ACVR2B,AKT3,BIRC6,CFLAR,CHUK,GRIA1,GRIN2D,HLA-DQA2,PIK3CA,PIK3R3,TREM2,VCAM1,XIAP
FAK Signaling	0	0.0222	-2.294	ACVR2B,ADGRA3,ADGRB1,ADORA2A,AKT3,ARPC1A,CSK,ELF2,FFAR2,GHR,GPR17,HTR2A,IL17RE,IL1RL1,ITGAM,ITGAX,ITGB1,PIK3CA,PIK3R3,PTGFR,PTPN12,RALA,SOCS7
FAT10 Cancer Signaling Pathway	1.95	0.1	-2.236	ACVR2B,AKT3,CHUK,SMAD2,TNFRSF11B
Lymphotoxin β Receptor Signaling	1.78	0.0909	-2.236	AKT3,CHUK,PIK3CA,PIK3R3,VCAM1
CNTF Signaling	1.72	0.0877	-2.236	PIK3CA,PIK3R3,RALA,RPS6KA1,RPS6KA3
HGF Signaling	1.55	0.0606	-2.236	AKT3,ELF2,ITGAM,ITGAX,ITGB1,PIK3CA,PIK3R3,RALA
ERK5 Signaling	1.29	0.0676	-2.236	MEF2C,RALA,RPS6KA1,RPS6KA3,RPS6KC1
D-myo-inositol (1,4,5,6)-Tetrakisphosphate Biosynthesis	1.2	0.0492	-2.236	PIKFYVE,PPM1J,PPP1R12A,PPP1R12B,PPP2R2B,PPP2R3A,PTPN12,SYNJ2,TNS3
D-myo-inositol (3,4,5,6)-tetrakisphosphate Biosynthesis	1.2	0.0492	-2.236	PIKFYVE,PPM1J,PPP1R12A,PPP1R12B,PPP2R2B,PPP2R3A,PTPN12,SYNJ2,TNS3
STAT3 Pathway	1.12	0.0519	-2.236	FGFR3,GHR,IL17RE,IL1RL1,MAP3K20,RALA,SOCS7
LPS-stimulated MAPK Signaling	1.09	0.0588	-2.236	ATF1,CHUK,PIK3CA,PIK3R3,RALA
Hedgehog 'on' state	1.07	0.0581	-2.236	CSNK1A1,DZIP1,SMURF2,SPOPL,ULK3
RANK Signaling in Osteoclasts	0.99	0.0549	-2.236	AKT3,CHUK,PIK3CA,PIK3R3,XIAP
VEGF Signaling	0.877	0.0505	-2.236	ACTG1,AKT3,PIK3CA,PIK3R3,RALA
Mouse Embryonic Stem Cell Pluripotency	0.813	0.0481	-2.236	AKT3,PIK3CA,PIK3R3,RALA,XIAP
Erythropoietin Signaling Pathway	0.281	0.0284	-2.236	AKT3,PIK3CA,PIK3R3,RALA,XIAP
ICOS-ICOSL Signaling in T Helper Cells	0	0.0118	-2.236	AKT3,CHUK,CSK,HLA-DQA2,PIK3CA,PIK3R3
PKCθ Signaling in T Lymphocytes	0	0.0125	-2.236	CACNB2,CHUK,HLA-DQA2,PIK3CA,PIK3R3,RALA,VAV3
RAR Activation	2.44	0.0513	-2.132	ACVR2B,ADCY5,AKT3,ALDH1A2,CSK,GDE1,GNB1,GRIA1,KAT2B,LAMB1,NRIP1,NRIP2,PDE2A,PDE3A,PIK3CA,PIK3R3,PPARGC1A,PRKACA,RHOBTB1,RHOT1,RORC,TRIM24
Regulation of eIF4 and p70S6K Signaling	3.27	0.0761	-2.121	AKT3,EIF4E,EIF4G3,ELP5,ITGAM,ITGAX,ITGB1,PIK3CA,PIK3R3,PPM1J,PPP2R2B,PPP2R3A,RALA,RPS12
Translocation of SLC2A4 (GLUT4) to the plasma membrane	3.17	0.113	-2.121	ACTG1,PRKAA2,PRKAB2,RAB4A,RALA,TBC1D1,TUBA4A,TUBB4B
Signaling by NTRK1 (TRKA)	2.79	0.0988	-2.121	ADORA2A,ATF1,MEF2C,PIK3CA,RALA,RALGDS,RPS6KA1,RPS6KA3
Melanocyte Development and Pigmentation Signaling	2.28	0.0816	-2.121	ADCY5,PIK3CA,PIK3R3,PRKACA,RALA,RPS6KA1,RPS6KA3,RPS6KC1
UVA-Induced MAPK Signaling	2.28	0.0816	-2.121	PIK3CA,PIK3R3,PLCB4,PLCH2,RALA,RPS6KA1,RPS6KA3,RPS6KC1
Telomerase Signaling	2.03	0.0741	-2.121	AKT3,ELF2,PIK3CA,PIK3R3,PPM1J,PPP2R2B,PPP2R3A,RALA
EIF2 Signaling	1.62	0.0522	-2.121	AKT3,EIF2AK3,EIF4E,EIF4G3,ELP5,PIK3CA,PIK3R3,PPP1R15A,RALA,RPL18,RPS12,XIAP
White Adipose Tissue Browning Pathway	1.45	0.058	-2.121	ADCY5,CACNB2,CAMP,FGFR3,PPARGC1A,PRKAA2,PRKAB2,PRKACA
RHO GTPases Activate Formins	1.44	0.0576	-2.121	ACTG1,DAAM1,EVL,ITGB1,KIF2A,NUP85,TUBA4A,TUBB4B
Role of Chondrocytes in Rheumatoid Arthritis Signaling Pathway	1.41	0.0567	-2.121	CFLAR,CHUK,IL1RL1,ITGB1,MMP15,PRKAA2,PRKAB2,TNFRSF11B
Glioblastoma Multiforme Signaling	1.35	0.0526	-2.121	AKT3,PIK3CA,PIK3R3,PLCB4,PLCH2,RALA,RHOBTB1,RHOT1,WNT9B
Macrophage Alternative Activation Signaling Pathway	0.831	0.0421	-2.121	ADORA2A,CIITA,HLA-DQA2,PIK3CA,PIK3R3,PPARGC1A,RPS6KA1,RPS6KC1
TEC Kinase Signaling	0	0.0208	-2.121	ACTG1,BLK,FGR,GNB1,ITGAM,ITGAX,ITGB1,PIK3CA,PIK3R3,RHOBTB1,RHOT1,VAV3
PI3K/AKT Signaling	3.91	0.08	-2.111	AKT3,CHUK,EIF4E,GHR,IL17RE,IL1RL1,ITGAM,ITGAX,ITGB1,PIK3CA,PIK3R3,PPM1J,PPP2R2B,PPP2R3A,RALA,SYNJ2
Integrin Signaling	2.68	0.066	-2.111	ACTG1,AKT3,ARPC1A,ITGAM,ITGAX,ITGB1,PIK3CA,PIK3R3,PIKFYVE,PPP1R12A,PPP1R12B,RALA,RHOBTB1,RHOT1
Natural Killer Cell Signaling	1.7	0.0556	-2.111	AKT3,COL11A2,HSPA14,HSPA2,ITGB1,LAIR1,LIMK2,PIK3CA,PIK3R3,RALA,VAV3
HER-2 Signaling in Breast Cancer	1.66	0.0529	-2.111	AKT3,BLK,CHUK,ELF2,FGR,ITGB1,NUP85,PIK3CA,PIK3R3,RALA,RBL1,XIAP
Pancreatic Secretion Signaling Pathway	1.11	0.0444	-2.111	ADCY5,ADORA2A,AKT3,ATP2B4,PIK3CA,PIK3R3,PLCB4,PLCH2,PPP1R12A,PRKACA,STXBP5
BBSome Signaling Pathway	0	0.0245	-2.111	ADGRA3,ADGRB1,ADORA2A,DZIP1,FFAR2,GPR17,HTR2A,PHF1,PRKACA,PTGFR,TRAF3IP1,VANGL2
Pulmonary Fibrosis Idiopathic Signaling Pathway	3.18	0.0613	-2.065	ACTG1,ACVR2B,AKT3,COL11A2,COL4A6,F2,FGFR3,FOXO6,ITGB1,MMP15,NOTCH1,PIK3CA,PIK3R3,PMAIP1,RALA,RPS6KA1,RPS6KA3,RPS6KC1,SMAD2,WNT9B
Carnitine metabolism	3.36	0.286	-2	ACACA,PRKAA2,PRKAB2,SLC22A5
Apelin Muscle Signaling Pathway	2.02	0.104	-2	AKT3,GNB1,PPARGC1A,PRKAA2,PRKAB2
MAPK targets/ Nuclear events mediated by MAP kinases	1.93	0.121	-2	ATF1,MEF2C,RPS6KA1,RPS6KA3
Gap junction trafficking and regulation	1.88	0.118	-2	ACTG1,MYO6,TUBA4A,TUBB4B
RHO GTPases Activate WASPs and WAVEs	1.8	0.111	-2	ABI1,ACTG1,ARPC1A,NCKAP1
CCR3 Signaling in Eosinophils	1.52	0.0597	-2	GNB1,LIMK2,PIK3CA,PIK3R3,PLCB4,PPP1R12A,PPP1R12B,RALA
Carboxyterminal post-translational modifications of tubulin	1.47	0.0889	-2	AGTPBP1,LRRC49,TUBA4A,TUBB4B
Melanoma Signaling	1.33	0.08	-2	AKT3,PIK3CA,PIK3R3,RALA
Glioma Invasiveness Signaling	1.31	0.0685	-2	PIK3CA,PIK3R3,RALA,RHOBTB1,RHOT1
UVB-Induced MAPK Signaling	1.28	0.0769	-2	EIF4E,PIK3CA,PIK3R3,RPS6KA3
Role of NANOG in Mammalian Embryonic Stem Cell Pluripotency	1.28	0.0565	-2	ACVR2B,AKT3,PIK3CA,PIK3R3,RALA,RIF1,WNT9B
Macropinocytosis Signaling	1.25	0.0658	-2	ABI1,ITGB1,PIK3CA,PIK3R3,RALA
Neurotrophin/TRK Signaling	1.21	0.0641	-2	PIK3CA,PIK3R3,RALA,RPS6KA1,SORCS1
Intrinsic Pathway for Apoptosis	1.21	0.0727	-2	AKT3,PMAIP1,UACA,XIAP
WNK Renal Signaling Pathway	1.16	0.0566	-2	AKT3,ANAPC5,LRRC8B,PIK3CA,PIK3R3,XIAP
Endometrial Cancer Signaling	1.1	0.0667	-2	AKT3,PIK3CA,PIK3R3,RALA
IL-2 Signaling	1.05	0.0645	-2	AKT3,PIK3CA,PIK3R3,RALA
CD40 Signaling	0.961	0.0597	-2	ATF1,CHUK,PIK3CA,PIK3R3
IL-17A Signaling in Airway Cells	0.961	0.0597	-2	AKT3,CHUK,PIK3CA,PIK3R3
Non-Small Cell Lung Cancer Signaling	0.946	0.0532	-2	AKT3,PIK3CA,PIK3R3,RALA,RBL1
SPINK1 General Cancer Pathway	0.927	0.058	-2	AKT3,PIK3CA,PIK3R3,RALA
Small Cell Lung Cancer Signaling	0.918	0.0521	-2	AKT3,CHUK,PIK3CA,PIK3R3,RBL1
GM-CSF Signaling	0.91	0.0571	-2	AKT3,PIK3CA,PIK3R3,RALA
Telomere Maintenance	0.862	0.0548	-2	ANKRD28,ATRX,GAR1,PPP6R3
trans-Golgi Network Vesicle Budding	0.847	0.0541	-2	AP4E1,CLINT1,GOLGB1,TFRC
IL-3 Signaling	0.775	0.0506	-2	AKT3,PIK3CA,PIK3R3,RALA
Renal Cell Carcinoma Signaling	0.775	0.0506	-2	AKT3,PIK3CA,PIK3R3,RALA
Thyroid Cancer Signaling	0.775	0.0506	-2	AKT3,PIK3CA,PIK3R3,RALA
Estrogen-Dependent Breast Cancer Signaling	0.735	0.0488	-2	AKT3,PIK3CA,PIK3R3,RALA
VEGF Family Ligand-Receptor Interactions	0.71	0.0476	-2	AKT3,PIK3CA,PIK3R3,RALA
FGF Signaling	0.685	0.0465	-2	AKT3,FGFR3,PIK3CA,PIK3R3
Cholecystokinin/Gastrin-mediated Signaling	0.651	0.042	-2	MEF2C,PLCB4,RALA,RHOBTB1,RHOT1
Acute Myeloid Leukemia Signaling	0.629	0.044	-2	AKT3,PIK3CA,PIK3R3,RALA
Glioma Signaling	0.596	0.04	-2	AKT3,PIK3CA,PIK3R3,RALA,RBL1
Prolactin Signaling	0.587	0.0421	-2	PIK3CA,PIK3R3,RALA,SOCS7
Microautophagy Signaling Pathway	0.569	0.0375	-2	COL11A2,COL4A6,LAMP2,PRKAA2,PRKAB2,RHOT1
Interleukin-1 family signaling	0.331	0.031	-2	CHUK,IL1RL1,NOD2,PTPN12
Ribonucleotide Reductase Signaling Pathway	0	0.0234	-2	AKT3,EIF4E,PIK3CA,PIK3R3
NOD1/2 Signaling Pathway	0	0.0265	-2	CHUK,HSPA14,HSPA2,NOD2,XIAP
IL-15 Signaling	0	0.0076	-2	AKT3,PIK3CA,PIK3R3,RALA
Necroptosis Signaling Pathway	0	0.0258	-2	CFLAR,CHUK,RBL1,TNFRSF11B
ERK/MAPK Signaling	3.07	0.0698	-1.941	ATF1,EIF4E,ELF2,ITGAM,ITGAX,ITGB1,PIK3CA,PIK3R3,PPM1J,PPP1R12A,PPP2R2B,PPP2R3A,PRKACA,RALA,RPS6KA1
G alpha (q) signalling events	3.01	0.0747	-1.941	F2,FFAR2,GNB1,GPR17,HTR2A,MCHR2,NTS,PIK3CA,PIK3R3,PLCB4,PTGFR,RGS1,RGS5
Orexin Signaling Pathway	1.86	0.0546	-1.941	ADCY5,AKT3,CACNB2,GNB1,PIK3CA,PIK3R3,PIKFYVE,PLCB4,PLCH2,PPARGC1A,PRKAA2,PRKAB2,PRKACA
Production of Nitric Oxide and Reactive Oxygen Species in Macrophages	1.8	0.0576	-1.897	AKT3,CHUK,PIK3CA,PIK3R3,PPM1J,PPP1R12A,PPP2R2B,PPP2R3A,RHOBTB1,RHOT1,TNFRSF11B
Activin Inhibin Signaling Pathway	1.2	0.0474	-1.897	ABHD5,ACVR2B,AKT3,CHUK,IL1RL1,LIMK2,PIK3CA,PIK3R3,SMAD2,TNFRSF11B
Class A/1 (Rhodopsin-like receptors)	0.442	0.0315	-1.897	ADORA2A,CCL21,F2,FFAR2,GPR17,HTR2A,MCHR2,NTS,PENK,PTGFR
Paxillin Signaling	2.59	0.0841	-1.89	ACTG1,CSK,ITGAM,ITGAX,ITGB1,PIK3CA,PIK3R3,PTPN12,RALA
14-3-3-mediated Signaling	2.1	0.0709	-1.89	AKT3,PIK3CA,PIK3R3,PLCB4,PLCH2,RALA,RPS6KA1,TUBA4A,TUBB4B
D-myo-inositol-5-phosphate Metabolism	1.68	0.0553	-1.89	PIKFYVE,PLCB4,PLCH2,PPM1J,PPP1R12A,PPP1R12B,PPP2R2B,PPP2R3A,PTPN12,SYNJ2,TNS3
Prostate Cancer Signaling	1.44	0.0614	-1.89	AKT3,AR,CHUK,PIK3CA,PIK3R3,RALA,RBL1
WNT/SHH Axonal Guidance Signaling Pathway	0.949	0.047	-1.89	ADCY5,FGR,PIK3CA,PIK3R3,PRKACA,VANGL2,WNT9B
Netrin Signaling	0.715	0.0405	-1.89	AKT3,ARPC1A,CACNB2,GRIA1,PIK3CA,PIK3R3,PRKACA
Tumor Microenvironment Pathway	0.666	0.0391	-1.89	AKT3,CFLAR,FOXO6,MMP15,PIK3CA,PIK3R3,RALA
Huntington's Disease Signaling	0.608	0.0352	-1.89	AKT3,GNB1,HSPA14,HSPA2,HTT,PACSIN1,PENK,PIK3CA,PIK3R3,PLCB4
Oxytocin in Brain Signaling Pathway	0.525	0.0352	-1.89	AKT3,CACNB2,GNB1,MEF2C,PIK3CA,PIK3R3,RALA
Phagosome Formation	0.708	0.033	-1.877	ADGRA3,ADGRB1,ADORA2A,AKT3,ARPC1A,FFAR2,FGR,GPLD1,GPR17,HTR2A,ITGAM,ITGAX,ITGB1,LIMK2,MYH11,PIK3CA,PIK3R3,PIKFYVE,PLD2,PTGFR,RALA,TIMD4,VAV3
S100 Family Signaling Pathway	0.448	0.0298	-1.877	ADGRA3,ADGRB1,ADORA2A,AKT3,BTC,CACNB2,CHUK,FFAR2,FGFR3,GPR17,HTR2A,MMP15,PIK3CA,PIK3R3,PLCB4,PLCH2,PRKACA,PTGFR,S100A5,SMAD2,TPM4,VCAM1,WNT9B
Role of Macrophages, Fibroblasts and Endothelial Cells in Rheumatoid Arthritis	1.4	0.045	-1.807	AKT3,CHUK,CSNK1A1,DAAM1,DKK3,IL1RL1,LRP6,PIK3CA,PIK3R3,PLCB4,PLCH2,RALA,TNFRSF11B,VCAM1,WNT9B
Neutrophil degranulation	0.5	0.0315	-1.807	ATP8B4,CAMP,DDX3X,FGR,ITGAM,ITGAX,LAIR1,LAMP2,MME,NHLRC3,PTX3,SCAMP1,SIGLEC5,STING1,TUBB4B
Cardiac Hypertrophy Signaling	1.9	0.0536	-1.732	ADCY5,CACNB2,EIF4E,GNB1,MEF2C,PIK3CA,PIK3R3,PLCB4,PLCH2,PRKACA,RALA,RHOBTB1,RHOT1,RPS6KA1
Insulin Secretion Signaling Pathway	1.72	0.0509	-1.732	ADCY5,CACNB2,EIF2AK3,EIF4E,EIF4G3,ELP5,FGR,GHR,NALCN,PIK3CA,PIK3R3,PLCB4,PLCH2,PRKACA
Class I MHC mediated antigen processing and presentation	0.49	0.032	-1.732	ANAPC5,ASB10,CBLB,CHUK,FBXW7,LMO7,SMURF2,TRIM37,UBA3,UBA7,UBE2Q2,UBE3C
mTOR Signaling	6.35	0.0981	-1.698	AKT3,EIF4E,EIF4G3,GPLD1,MAPKAP1,PIK3CA,PIK3R3,PLD2,PPM1J,PPP2R2B,PPP2R3A,PRKAA2,PRKAB2,PRR5L,RALA,RHOBTB1,RHOT1,RPS12,RPS6KA1,RPS6KA3,RPS6KC1
Oxytocin Signaling Pathway	2.71	0.0603	-1.698	AKT3,ATP2B4,CACNB2,GNB1,MEF2C,MYH11,NPR2,PIK3CA,PIK3R3,PLCB4,PPP1R12A,PPP1R12B,PRKAA2,PRKAB2,PRKACA,PTGFR,RALA
Histone Modification Signaling Pathway	2.5	0.0576	-1.698	AR,ATRX,BPTF,CHD1,CHUK,DPF3,ING3,ING5,KAT2B,KAT5,KDM6A,MST1,PHF1,TDRD3,TRIM24,ULK3,ZMYND11
RAC Signaling	2.88	0.0803	-1.667	ARPC1A,ITGAM,ITGAX,ITGB1,LIMK2,MCF2L,NCKAP1,PIK3CA,PIK3R3,PIKFYVE,RALA
Reelin Signaling in Neurons	2.85	0.0797	-1.667	AKT3,ARPC1A,BLK,DNAH1,FGR,GRIN2D,ITGB1,PAFAH1B3,PDK3,PIK3CA,PIK3R3
Leukocyte Extravasation Signaling	1.41	0.0518	-1.667	ACTG1,CLDN1,ITGAM,ITGB1,MMP15,PIK3CA,PIK3R3,SIPA1,VAV3,VCAM1
Xenobiotic Metabolism PXR Signaling Pathway	1.07	0.0462	-1.667	ALDH1A2,CHST3,HS3ST5,NRIP1,PPARGC1A,PPP1R12A,PRKACA,SULT1B1,UGT1A1
PI3K Signaling in B Lymphocytes	0	0.0153	-1.667	AKT3,ATF1,BLK,CHUK,PIK3CA,PLCB4,PLCH2,RALA,VAV3
Actin Nucleation by ARP-WASP Complex	3.01	0.0968	-1.633	ARPC1A,ITGAM,ITGAX,ITGB1,PPP1R12A,PPP1R12B,RALA,RHOBTB1,RHOT1
Regulation of Actin-based Motility by Rho	2.38	0.0783	-1.633	ARPC1A,ITGAM,ITGAX,ITGB1,PIKFYVE,PPP1R12A,PPP1R12B,RHOBTB1,RHOT1
Cancer Drug Resistance by Drug Efflux	2.32	0.103	-1.633	ABCG2,AKT3,FOXO6,PIK3CA,PIK3R3,RALA
JAK/STAT Signaling	1.62	0.0732	-1.633	AKT3,PIAS2,PIK3CA,PIK3R3,RALA,SOCS7
TP53 Regulates Metabolic Genes	1.48	0.0682	-1.633	AKT3,MOV10,PRKAA2,PRKAB2,RRAGD,TNRC6A
IGF-1 Signaling	1.17	0.0571	-1.633	AKT3,PIK3CA,PIK3R3,PRKACA,RALA,SOCS7
Sleep REM Signaling Pathway	1.08	0.0541	-1.633	EIF4E,HOMER1,PRKACA,RPS6KA1,RPS6KA3,RPS6KC1
3-phosphoinositide Degradation	1.08	0.0464	-1.633	PIKFYVE,PPM1J,PPP1R12A,PPP1R12B,PPP2R2B,PPP2R3A,PTPN12,SYNJ2,TNS3
Factors Promoting Cardiogenesis in Vertebrates	0.905	0.0458	-1.633	ACVR2B,LRP6,MEF2C,PLCB4,PLCH2,SMAD2,WNT9B
TR/RXR Activation	0.865	0.0469	-1.633	ACACA,AKT3,DAPK2,PIK3CA,PIK3R3,PPARGC1A
fMLP Signaling in Neutrophils	0.831	0.0458	-1.633	ARPC1A,GNB1,PIK3CA,PIK3R3,PLCB4,RALA
Adipogenesis pathway	0.749	0.0432	-1.633	ACVR2B,FBXW7,FGFR3,KAT2B,RPS6KA1,RPS6KC1
Neddylation	0	0.0244	-1.633	ASB10,COP1,DCAF6,FBXW7,LMO7,UBA3
AMPK Signaling	3.44	0.0702	-1.604	ACACA,AK8,AKT3,FOXO6,GNB1,KAT2B,MLYCD,PIK3CA,PIK3R3,PPARGC1A,PPM1J,PPP2R2B,PPP2R3A,PRKAA2,PRKAB2,PRKACA,TBC1D1
Molecular Mechanisms of Cancer	1.95	0.0409	-1.521	ACVR2B,ADCY5,ADGRA3,ADGRB1,ADORA2A,AKT3,CFLAR,F2,FFAR2,GHR,GNB1,GPR17,HIPK2,HTR2A,IL17RE,IL1RL1,ITGAM,ITGAX,ITGB1,LRP6,MMP15,NOTCH1,PIK3CA,PIK3R3,PLCB4,PMAIP1,PRKACA,PTGFR,RALA,RALGDS,RBL1,RHOBTB1,RHOT1,SMAD2,XIAP
PIP3 activates AKT signaling	2.8	0.0786	-1.508	AKT3,BTC,CHUK,FGFR3,FOXO6,IL1RL1,MAPKAP1,NRG2,PIK3CA,PIK3R3,PRR5L
Superpathway of Inositol Phosphate Compounds	2.25	0.0591	-1.508	IP6K2,PIK3CA,PIK3R3,PIKFYVE,PLCB4,PLCH2,PPM1J,PPP1R12A,PPP1R12B,PPP2R2B,PPP2R3A,PTPN12,SYNJ2,TNS3
Role of NFAT in Cardiac Hypertrophy	1.7	0.0536	-1.508	ADCY5,AKT3,CACNB2,CSNK1A1,GNB1,MEF2C,PIK3CA,PIK3R3,PLCB4,PLCH2,PRKACA,RALA
Eicosanoid Signaling	1.66	0.05	-1.508	ADCY5,AKT3,GNB1,ITGB1,MAPKAP1,PIK3CA,PIK3R3,PLCB4,PLCH2,PRKACA,PTGFR,RALA,RPS6KA1,RPS6KA3
Glutaminergic Receptor Signaling Pathway (Enhanced)	1.77	0.0492	-1.5	ADCY5,AKT3,CACNB2,CHUK,EIF4E,GPLD1,GRIA1,GRIA4,GRIN2D,HOMER1,PIK3CA,PIK3R3,PLCB4,PLCH2,PLD2,PRKACA
Myelination Signaling Pathway	2.41	0.055	-1.414	ACVR2B,AKT3,BLK,EIF4E,FGFR3,FGR,GPR17,ITGB1,LAMA2,LAMB1,NOTCH1,PIK3CA,PIK3R3,PRKACA,RALA,SMAD2,WNT9B,ZEB2
Fcγ Receptor-mediated Phagocytosis in Macrophages and Monocytes	2.39	0.0851	-1.414	ACTG1,AKT3,ARPC1A,FGR,GPLD1,PIK3R3,PLD2,VAV3
Cardiac conduction	2.04	0.0692	-1.414	AKAP9,ATP2B4,CACNB2,HIPK2,KAT2B,KCNJ2,MME,NPR2,PRKACA
cAMP-mediated signaling	1.89	0.0551	-1.414	ADCY5,ADORA2A,AKAP12,AKAP13,AKAP6,AKAP9,GDE1,GPR17,PALM2AKAP2,PDE2A,PDE3A,PRKACA,RPS6KA1
Acute Phase Response Signaling	1.52	0.0541	-1.414	AKT3,C2,CFB,CHUK,F2,PIK3CA,PIK3R3,RALA,SOCS7,TNFRSF11B
CXCR4 Signaling	1.39	0.0536	-1.414	ADCY5,AKT3,GNB1,PIK3CA,PIK3R3,PLCB4,RALA,RHOBTB1,RHOT1
HEY1 Signaling Pathway	3.32	0.0807	-1.387	ACVR2B,AKT3,AR,GATA5,MEF2C,MMP15,MYH11,NOTCH1,PIK3CA,PIK3R3,PRKAA2,PRKAB2,SMAD2
Signaling by Rho Family GTPases	2.96	0.0637	-1.387	ACTG1,ARPC1A,CDH13,GNB1,ITGAM,ITGAX,ITGB1,LIMK2,MAP3K20,PIK3CA,PIK3R3,PIKFYVE,PPP1R12A,PPP1R12B,RHOBTB1,RHOT1,SEPTIN10
ID1 Signaling Pathway	2.45	0.0647	-1.387	ABI1,ACVR2B,AKT3,BLK,FGFR3,FGR,PIK3CA,PIK3R3,PLXNB1,RALA,SMAD2,TNFRSF11B,ZNF148
Cilium Assembly	2.4	0.0637	-1.387	AKAP9,ALMS1,CCP110,CEP135,CEP83,DYNC2H1,DYNLT2,MKS1,NPHP1,PRKACA,TRAF3IP1,TUBA4A,TUBB4B
Gap Junction Signaling	3.19	0.0615	-1.342	ACTG1,ADCY5,AKT3,CSNK1A1,GRIA1,GRIA4,HTR2A,KCNQ3,LRP6,NPR2,PIK3CA,PIK3R3,PLCB4,PLCH2,PRKACA,RALA,SMAD2,TNFRSF11B,TUBA4A,TUBB4B
Aldosterone Signaling in Epithelial Cells	3.05	0.0756	-1.342	DNAJB13,DNAJB7,DNAJC25,DNAJC27,DNAJC28,HSPA14,HSPA2,HSPD1,PIK3CA,PIK3R3,PIKFYVE,PLCB4,PLCH2
Signaling by TGF-beta Receptor Complex	1.84	0.0943	-1.342	ITGB1,LTBP2,PPP1R15A,SMAD2,SMURF2
PTEN Regulation	1.66	0.06	-1.342	AKT3,MOV10,PHC3,PREX2,RRAGD,SCMH1,TNRC6A,WWP2,XIAP
Kinesins	1.6	0.082	-1.342	KIF25,KIF2A,KIF5B,TUBA4A,TUBB4B
PAK Signaling	1.39	0.0598	-1.342	ITGAM,ITGAX,ITGB1,LIMK2,PIK3CA,PIK3R3,RALA
BEX2 Signaling Pathway	1.14	0.061	-1.342	AKT3,PPM1J,PPP2R2B,PPP2R3A,SWAP70
Platelet homeostasis	1.07	0.0581	-1.342	ATP2B4,FGR,GNB1,IRAG1,PDE2A
Apelin Adipocyte Signaling Pathway	0.99	0.0549	-1.342	ADCY5,PPARGC1A,PRKAA2,PRKAB2,PRKACA
Cell junction organization	0.975	0.0543	-1.342	ACTG1,CDH13,CLDN1,DST,ITGB1
Renin-Angiotensin Signaling	0.948	0.0496	-1.342	ADCY5,PIK3CA,PIK3R3,PRKACA,RALA,REN
EPH-Ephrin signaling	0.946	0.0532	-1.342	ACTG1,ARPC1A,LIMK2,MYH11,VAV3
Protein folding	0.89	0.051	-1.342	FBXW7,GNB1,TUBA4A,TUBB4B,XRN2
Apelin Cardiomyocyte Signaling Pathway	0.877	0.0505	-1.342	AKT3,PIK3CA,PIK3R3,PLCB4,PLCH2
Ovarian Cancer Signaling	0.853	0.0443	-1.342	AKT3,PIK3CA,PIK3R3,PRKACA,RALA,RBL1,WNT9B
Breast Cancer Regulation by Stathmin1	0.714	0.0337	-1.342	ADGRA3,ADGRB1,ADORA2A,FFAR2,GNB1,GPR17,HTR2A,PIK3CA,PIK3R3,PLCB4,PPM1J,PPP1R12A,PPP2R2B,PPP2R3A,PRKACA,PTGFR,RALA,RPS6KA3,TUBA4A,TUBB4B
IL-13 Signaling Pathway	0.68	0.0431	-1.342	AKT3,BLK,FGR,PIK3CA,PIK3R3
MHC class II antigen presentation	0.587	0.0397	-1.342	HLA-DQA2,KIF2A,KIF5B,TUBA4A,TUBB4B
Mitotic Metaphase and Anaphase	0	0.0213	-1.342	ANAPC5,KIF2A,NUP85,TUBA4A,TUBB4B
SAPK/JNK Signaling	0	0.00996	-1.342	GNB1,MAP3K20,PIK3CA,PIK3R3,RALA
Serotonin Receptor Signaling	4.4	0.0618	-1.3	ADCY5,AKT3,BLK,CACNB2,FFAR2,FGR,GNB1,GPLD1,HTR2A,IL1RL1,ITGB1,KCNQ3,PIK3CA,PIK3R3,PLCB4,PLCH2,PLD2,PPARGC1A,PPP1R12A,PPP1R12B,PRKACA,QDPR,RAB4A,RALA,RBL1,RHOBTB1,RHOT1,RPS6KA3,TGM3
Chronic Myeloid Leukemia Signaling	2.02	0.054	-1.291	AKT3,BLK,CHUK,ITGB1,NOTCH1,PIK3CA,PIK3R3,PLCB4,PLCH2,PRKAA2,PRKAB2,RALA,RBL1,WNT9B,XIAP
Role of Osteoclasts in Rheumatoid Arthritis Signaling Pathway	1.97	0.0519	-1.291	AKT3,CHUK,COL11A2,COL4A6,FOXO6,IL1RL1,MMP15,PIK3CA,PIK3R3,RALA,RHOBTB1,RHOT1,TNFRSF11B,TREM2,VAV3,XIAP
Neutrophil Extracellular Trap Signaling Pathway	0.879	0.0375	-1.291	AKT3,BLK,CAMP,COL11A2,COL4A6,FGR,ITGAM,ITGB1,LAIR1,NDUFV1,PIK3CA,PIK3R3,PLCB4,PLCH2,SIGLEC5
MicroRNA Biogenesis Signaling Pathway	1.49	0.0535	-1.265	AKT3,CSDE1,DROSHA,KHSRP,NUP85,PIK3CA,PIK3R3,RALA,SMAD2,XRN1
Xenobiotic Metabolism CAR Signaling Pathway	1.4	0.0515	-1.265	ALDH1A2,CHST3,HS3ST5,NRIP1,PPARGC1A,PPM1J,PPP2R2B,PPP2R3A,SULT1B1,UGT1A1
Synaptic Long Term Depression	1.35	0.0505	-1.265	CACNB2,GRIA1,GRIA4,NPR2,PLCB4,PLCH2,PPM1J,PPP2R2B,PPP2R3A,RALA
Deubiquitination	0.741	0.038	-1.265	AR,CCP110,KAT2B,NOD2,RHOT1,SMAD2,SMURF2,TRIM25,USP25,YOD1
p70S6K Signaling	0	0.0173	-1.265	AKT3,F2,PIK3CA,PIK3R3,PLCB4,PLCH2,PPM1J,PPP2R2B,PPP2R3A,RALA
Phospholipase C Signaling	0	0.0143	-1.265	ADCY5,GNB1,GPLD1,ITGAM,ITGAX,ITGB1,MEF2C,PLCB4,PLD2,PPP1R12A,PPP1R12B,RALA,RALGDS,RHOBTB1,RHOT1,RPS6KA3
IL-4 Signaling	0	0.0173	-1.265	AKT3,COL11A2,COL4A6,HLA-DQA2,MAPKAP1,PIK3CA,PIK3R3,PRR5L,RALA,RPS6KA1
Autism Signaling Pathway	2.32	0.0552	-1.213	AKT3,ALDH1A2,BCKDHA,BCL9,CACNB2,EIF4E,FOLR1,GRIN2D,LRP6,MTHFR,PIK3CA,PIK3R3,PRKACA,RALA,RPS6KA1,RPS6KC1,WNT9B
SUMOylation of transcription cofactors	3.77	0.159	-1.134	HIPK2,NRIP1,PHC3,PIAS2,PPARGC1A,SCMH1,ZNF131
Costimulation by the CD28 family	2.28	0.0897	-1.134	AKT3,CSK,HLA-DQA2,MAPKAP1,PIK3CA,PIK3R3,PRR5L
Signaling by MET	2.24	0.0886	-1.134	COL11A2,ITGB1,LAMA2,LAMB1,PIK3CA,RAB4A,TNS3
PEDF Signaling	2.1	0.0833	-1.134	AKT3,CFLAR,CHUK,DOCK3,PIK3CA,PIK3R3,RALA
Type II Diabetes Mellitus Signaling	2.04	0.0654	-1.134	AKT3,CACNB2,CHUK,NSMAF,PIK3CA,PIK3R3,PRKAA2,PRKAB2,SOCS7,TNFRSF11B
Sphingosine-1-phosphate Signaling	1.77	0.0667	-1.134	ADCY5,AKT3,PIK3CA,PIK3R3,PLCB4,PLCH2,RHOBTB1,RHOT1
GP6 Signaling Pathway	1.64	0.063	-1.134	AKT3,COL11A2,COL4A6,LAMA2,LAMB1,PIK3CA,PIK3R3,VAV3
Calcium Signaling	1.41	0.05	-1.134	ATP2B4,ATP2C1,CACNB2,GRIA1,GRIA4,GRIN2D,MEF2C,MYH11,PRKACA,TNNT3,TPM4
SNARE Signaling Pathway	1.11	0.0515	-1.134	ADCY5,CACNB2,MYH11,PRKACA,SNAP91,STXBP5,SYT17
Ephrin A Signaling	1.07	0.0504	-1.134	AKT3,BLK,FGR,PIK3CA,PIK3R3,PRKACA,VAV3
Xenobiotic Metabolism General Signaling Pathway	1.02	0.049	-1.134	AKT3,EIF2AK3,GCLC,PIK3CA,PIK3R3,RALA,UGT1A1
IL-10 Signaling	0.894	0.0455	-1.134	AKT3,CHUK,FFAR2,HLA-DQA2,IL1RL1,PRKAA2,PRKAB2
HOTAIR Regulatory Pathway	0.804	0.0429	-1.134	AKT3,AR,MMP15,PIK3CA,PIK3R3,WNT9B,XIAP
Ion channel transport	0.635	0.0383	-1.134	ANO9,ATP2B4,ATP2C1,ATP8B4,NALCN,SGK2,TTYH1
Hepatic Cholestasis	0.394	0.0314	-1.134	ADCY5,AKT3,CHUK,IL1RL1,NR5A2,PRKACA,TNFRSF11B
CDC42 Signaling	0	0.0174	-1.134	ARPC1A,CDC42BPA,HLA-DQA2,ITGAM,ITGAX,ITGB1,LIMK2,PPP1R12A,PPP1R12B,RALA
Actin Cytoskeleton Signaling	3.4	0.0697	-1.069	ACTG1,ARPC1A,CSK,F2,ITGAM,ITGAX,ITGB1,LIMK2,MYH11,NCKAP1,PIK3CA,PIK3R3,PPP1R12A,PPP1R12B,RALA,TIAM2,VAV3
Leptin Signaling in Obesity	2.97	0.105	-1	ADCY5,AKT3,PDE3A,PIK3CA,PIK3R3,PLCB4,PLCH2,PRKACA
Neuropathic Pain Signaling in Dorsal Horn Neurons	2.76	0.0891	-1	GRIA1,GRIA4,GRIN2D,KCNQ3,PIK3CA,PIK3R3,PLCB4,PLCH2,PRKACA
MSP-RON Signaling in Macrophages Pathway	2.28	0.0756	-1	CHUK,CIITA,HLA-DQA2,ITGAM,MST1,PIK3CA,PIK3R3,RALA,SBNO2
Ferroptosis Signaling Pathway	2.01	0.0687	-1	ACACA,EIF2AK3,GCLC,PHKG2,PRKAA2,PRKAB2,RALA,RBL1,TFRC
P2Y Purinergic Receptor Signaling Pathway	1.97	0.0677	-1	ADCY5,AKT3,GNB1,PIK3CA,PIK3R3,PLCB4,PLCH2,PRKACA,RALA
Agrin Interactions at Neuromuscular Junction	1.95	0.087	-1	ACTG1,ITGB1,LAMA2,LAMB1,NRG2,RALA
IL-23 Signaling Pathway	1.44	0.087	-1	AKT3,PIK3CA,PIK3R3,RORC
Unfolded protein response	1.44	0.0667	-1	DNAJB13,DNAJB7,EIF2AK3,HSPA14,HSPA2,PPP1R15A
Antiproliferative Role of Somatostatin Receptor 2	1.23	0.0649	-1	GNB1,NPR2,PIK3CA,PIK3R3,RALA
HSP90 chaperone cycle for steroid hormone receptors in the presence of ligand	1.21	0.0727	-1	AR,HSPA2,TUBA4A,TUBB4B
TNF signaling	1.16	0.0702	-1	CFLAR,CHUK,NSMAF,XIAP
Acetylcholine Receptor Signaling Pathway	1.08	0.0464	-1	ADCY5,AKT3,CACNB2,KCNJ2,PIK3CA,PIK3R3,PLCB4,PLCH2,PRKACA
Mitotic G2-G2/M phases	1.02	0.0452	-1	AKAP9,ALMS1,CCP110,CEP135,PPP1R12A,PPP1R12B,PRKACA,TUBA4A,TUBB4B
ERB2-ERBB3 Signaling	0.997	0.0615	-1	NRG2,PIK3CA,PIK3R3,RALA
Mitotic Prometaphase	0.985	0.0443	-1	AKAP9,ALMS1,CCP110,CEP135,KIF2A,NUP85,PRKACA,TUBA4A,TUBB4B
ERBB4 Signaling	0.944	0.0588	-1	NRG2,PIK3CA,PIK3R3,RALA
COPII-mediated vesicle transport	0.878	0.0556	-1	ANKRD28,FOLR1,GRIA1,PPP6R3
PDGF Signaling	0.674	0.046	-1	PIK3CA,PIK3R3,RALA,SYNJ2
Xenobiotic Metabolism AHR Signaling Pathway	0.674	0.046	-1	ABCG2,ALDH1A2,NRIP1,UGT1A1
RAB GEFs exchange GTP for GDP on RABs	0.651	0.0449	-1	AKT3,ALS2CL,RAB27B,TRAPPC13
Regulation of TP53 Activity through Phosphorylation	0.607	0.043	-1	HIPK2,KAT5,PRKAA2,PRKAB2
TGF-β Signaling	0.567	0.0412	-1	ACVR2B,RALA,SMAD2,SMURF2
COPI-mediated anterograde transport	0.521	0.0392	-1	FOLR1,GOLGB1,TUBA4A,TUBB4B
Potassium Channels	0.512	0.0388	-1	GNB1,KCNJ2,KCNQ3,KCNS2
LPS/IL-1 Mediated Inhibition of RXR Function	0.399	0.0311	-1	ALDH1A2,CHST3,HS3ST5,IL1RL1,NR5A2,PPARGC1A,SULT1B1,TNFRSF11B
Fc epsilon receptor (FCERI) signaling	0	0.0194	-1	CHUK,PIK3CA,RASGRP4,VAV3
Regulation of IL-2 Expression in Activated and Anergic T Lymphocytes	0	0.00866	-1	CHUK,RALA,SMAD2,VAV3
Gαq Signaling	2.61	0.0706	-0.905	AKT3,CHUK,CSK,GNB1,GPLD1,HTR2A,PIK3CA,PIK3R3,PLCB4,PLD2,RHOBTB1,RHOT1
Colorectal Cancer Metastasis Signaling	2.12	0.0554	-0.905	ADCY5,AKT3,GNB1,LRP6,MMP15,MSH3,PIK3CA,PIK3R3,PRKACA,RALA,RALGDS,RHOBTB1,RHOT1,SMAD2,WNT9B
Adrenomedullin signaling pathway	1.68	0.0553	-0.905	ADCY5,AKT3,CSK,KCNQ3,NPR2,PIK3CA,PIK3R3,PLCB4,PLCH2,PRKACA,RALA
Estrogen Receptor Signaling	2.69	0.0538	-0.894	ADCY5,AKT3,CACNB2,EIF4E,FOXO6,GNB1,LIMK2,MMP15,NDUFV1,NOTCH1,NRIP1,PIK3CA,PIK3R3,PLCB4,PLCH2,PPARGC1A,PPP1R12A,PPP1R12B,PRKAA2,PRKAB2,PRKACA,RALA
Mitochondrial biogenesis	2.11	0.0938	-0.816	CRTC1,CRTC3,MEF2C,PPARGC1A,PRKAA2,PRKAB2
Amyotrophic Lateral Sclerosis Signaling	1.85	0.069	-0.816	AKT3,CACNB2,GRIA1,GRIA4,GRIN2D,PIK3CA,PIK3R3,XIAP
TREM1 Signaling	1.74	0.0779	-0.816	AKT3,CIITA,IL1RL1,ITGAX,ITGB1,NOD2
Endocannabinoid Developing Neuron Pathway	1.23	0.0551	-0.816	ADCY5,AKT3,GNB1,PIK3CA,PIK3R3,PRKACA,RALA
Beta-catenin independent WNT signaling	1.22	0.0588	-0.816	DAAM1,GNB1,MOV10,SMURF2,TNRC6A,VANGL2
GPCR-Mediated Nutrient Sensing in Enteroendocrine Cells	0.987	0.0508	-0.816	ADCY5,CACNB2,FFAR2,PLCB4,PLCH2,PRKACA
Response to elevated platelet cytosolic Ca2+	0.82	0.0455	-0.816	CYRIB,FAM3C,LAMP2,RAB27B,SPP2,TUBA4A
DHCR24 Signaling Pathway	0.768	0.0438	-0.816	AKT3,AR,PIK3CA,PIK3R3,RALA,VCAM1
IL-17 Signaling	0.399	0.0321	-0.816	AKT3,IL17RE,PIK3CA,PIK3R3,RALA,TNFRSF11B
Sirtuin Signaling Pathway	0	0.0206	-0.816	MLYCD,NDUFV1,PPARGC1A,PRKAA2,TUBA4A,XPC
Synaptogenesis Signaling Pathway	1.89	0.0508	-0.775	ADCY5,AKT3,ARPC1A,CACNB2,CDH13,FGR,GRIA1,GRIA4,GRIN2D,PIK3CA,PIK3R3,PRKACA,RALA,STXBP5,SYT17,THBS4
RHOA Signaling	1.7	0.0645	-0.707	ACTG1,ARPC1A,KTN1,LIMK2,PIKFYVE,PPP1R12A,PPP1R12B,SEPTIN10
IL-27 Signaling Pathway	1.62	0.0625	-0.707	AKT3,IL1RL1,IL27,PIK3CA,PIK3R3,PPARGC1A,RORC,TNFRSF11B
Ephrin Receptor Signaling	1.3	0.0495	-0.707	ABI1,AKT3,ARPC1A,GNB1,GRIN2D,ITGAM,ITGAX,ITGB1,LIMK2,RALA
G alpha (i) signalling events	0.394	0.031	-0.707	ADCY5,CCL21,GNB1,GPR17,MCHR2,PENK,RGS1,RGS5
Sertoli Cell-Germ Cell Junction Signaling Pathway (Enhanced)	4.57	0.0805	-0.688	ACTG1,AKT3,ARPC1A,CLDN1,IL1RL1,ITGB1,LAMA2,LAMB1,PIK3CA,PIK3R3,PPM1J,PPP2R2B,PPP2R3A,PRKAA2,PRKAB2,PRKACA,RALA,SMAD2,TNFRSF11B
Clathrin-mediated endocytosis	2.53	0.0769	-0.632	AAK1,ACTG1,AMPH,ARPC1A,BTC,NECAP2,PACSIN1,SNAP91,SYNJ2,TFRC
Thrombin Signaling	2.45	0.0622	-0.632	ADCY5,AKT3,F2,GATA5,GNB1,PIK3CA,PIK3R3,PLCB4,PLCH2,PPP1R12A,PPP1R12B,RALA,RHOBTB1,RHOT1
Intra-Golgi and retrograde Golgi-to-ER traffic	1.29	0.0493	-0.632	GOLGA4,KIF25,KIF2A,KIF5B,MAN1A2,NBAS,PAFAH1B3,TUBA4A,TUBB4B,VPS52
Generic Transcription Pathway	0	0.0234	-0.632	AR,KAT2B,NOTCH1,NR5A2,RORC,ZFP14,ZKSCAN1,ZNF274,ZNF655,ZNF791
Dendritic Cell Maturation	0	0.0201	-0.577	AKT3,CD1B,CHUK,COL11A2,DDR2,HLA-DQA2,PIK3CA,PIK3R3,PLCB4,PLCH2,TNFRSF11B,TREM2
Cachexia Signaling Pathway	1.9	0.0489	-0.471	ACVR2B,ADCY5,AKT3,CHUK,EIF2AK3,FOXO6,HSPA14,HSPA2,IL1RL1,KLF15,MEF2C,PIK3CA,PIK3R3,PRKAA2,PRKAB2,PRKACA,SMAD2,TNFRSF11B
Regulation of beta-cell development	2.27	0.119	-0.447	AKT3,KAT2B,NOTCH1,NR5A2,RFX6
Signaling by ERBB2	1.95	0.1	-0.447	AKT3,BTC,NRG2,PIK3CA,PTPN12
Neuregulin Signaling	1.83	0.0684	-0.447	AKT3,BTC,ITGAM,ITGAX,ITGB1,NRG2,PIK3R3,RALA
Circadian Clock	1.66	0.0847	-0.447	CRTC1,CRTC3,MEF2C,NRIP1,PPARGC1A
Hedgehog 'off' state	1.46	0.0619	-0.447	ADCY5,CSNK1A1,DYNC2H1,MKS1,PRKACA,TUBA4A,TUBB4B
Nitric Oxide Signaling in the Cardiovascular System	1.34	0.0583	-0.447	AKT3,CACNB2,NPR2,PDE2A,PIK3CA,PIK3R3,PRKACA
Extra-nuclear estrogen signaling	1.31	0.0685	-0.447	AKT3,BTC,GNB1,PIK3CA,PIK3R3
Signaling by NOTCH1	1.21	0.0641	-0.447	DTX2,FBXW7,KAT2B,NOTCH1,TLE4
Chemokine Signaling	1.16	0.0617	-0.447	LIMK2,PLCB4,PPP1R12A,PPP1R12B,RALA
Transport of bile salts and organic acids, metal ions and amine compounds	1.12	0.0602	-0.447	SLC10A6,SLC14A1,SLC22A3,SLC22A5,SLC44A3
ERBB Signaling	0.96	0.0538	-0.447	BTC,NRG2,PIK3CA,PIK3R3,RALA
Cargo recognition for clathrin-mediated endocytosis	0.778	0.0467	-0.447	AAK1,BTC,NECAP2,SNAP91,TFRC
Post-translational protein phosphorylation	0.778	0.0467	-0.447	HRC,KTN1,LAMB1,PENK,SPP2
Gαi Signaling	0.739	0.0429	-0.447	ADCY5,GNB1,GPR17,PRKACA,RALA,RALGDS
Antioxidant Action of Vitamin C	0.701	0.0439	-0.447	CHUK,GPLD1,PLCB4,PLCH2,PLD2
TCR signaling	0.587	0.0397	-0.447	CHUK,CSK,EVL,HLA-DQA2,PIK3CA
G Beta Gamma Signaling	0.562	0.0388	-0.447	AKT3,CACNB2,GNB1,PRKACA,RALA
G alpha (s) signalling events	0.444	0.0345	-0.447	ADCY5,ADORA2A,GNB1,PDE2A,PDE3A
GNRH Signaling	0.378	0.0314	-0.447	ADCY5,CACNB2,GNB1,PLCB4,PRKACA,RALA
Adrenergic Receptor Signaling Pathway (Enhanced)	0	0.025	-0.447	ADCY5,CACNB2,PLCB4,PLCH2,PRKACA
Immunoregulatory interactions between a Lymphoid and a non-Lymphoid cell	0	0.0248	-0.447	CD1B,ITGB1,LAIR1,TREM2,VCAM1
Cohesin Chromatin Regulation Pathway	0	0.0202	-0.447	ANAPC5,ATRX,PPM1J,PPP2R2B,PPP2R3A
Relaxin Signaling	2	0.0645	-0.378	ADCY5,AKT3,GDE1,GNB1,NPR2,PDE2A,PDE3A,PIK3CA,PIK3R3,PRKACA
Immunogenic Cell Death Signaling Pathway	1.94	0.0778	-0.378	CFLAR,DAPK2,EIF2AK3,HSPA14,HSPA2,STING1,TNFRSF11B
eNOS Signaling	1.57	0.0577	-0.378	ADCY5,AKT3,HSPA14,HSPA2,PIK3CA,PIK3R3,PRKAA2,PRKAB2,PRKACA
IL-15 Production	1.29	0.0569	-0.378	BLK,CSK,DDR2,FGFR3,FGR,PEAK1,TNK1
TCF dependent signaling in response to WNT	0.525	0.0352	-0.378	BCL9,CSNK1A1,KAT5,LRP6,SMURF2,TLE4,XIAP
Cell surface interactions at the vascular wall	0.455	0.0332	-0.378	F2,ITGAM,ITGAX,ITGB1,PIK3CA,PROCR,SLC7A8
Cell Cycle Checkpoints	0	0.0257	-0.378	ANAPC5,COP1,DBF4,KAT5,KIF2A,MCM4,NUP85
Cardiac β-adrenergic Signaling	4.45	0.0889	-0.333	ADCY5,AKAP12,AKAP13,AKAP6,AKAP9,CACNB2,GDE1,GNB1,PALM2AKAP2,PDE2A,PDE3A,PPM1J,PPP1R12A,PPP2R2B,PPP2R3A,PRKACA
CDK5 Signaling	3.52	0.0957	-0.333	ADCY5,CABLES1,ITGB1,LAMA2,LAMB1,PPM1J,PPP1R12A,PPP2R2B,PPP2R3A,PRKACA,RALA
PI Metabolism	3.41	0.11	-0.333	GDE1,PIK3CA,PIK3R3,PIKFYVE,PLEKHA6,PNPLA7,RAB4A,SYNJ2,TNFAIP8
Extracellular matrix organization	2.61	0.0849	-0.333	COL11A2,COL4A6,DDR2,DMD,ITGAX,ITGB1,LAMA2,LAMB1,NCAM1
Endocannabinoid Neuronal Synapse Pathway	2.11	0.0671	-0.333	ADCY5,CACNB2,DNAH1,GNB1,GRIA1,GRIA4,GRIN2D,PLCB4,PLCH2,PRKACA
Synaptic Long Term Potentiation	1.99	0.0682	-0.333	GRIA1,GRIA4,GRIN2D,PLCB4,PLCH2,PPP1R12A,PRKACA,RALA,RPS6KA1
Inhibition of ARE-Mediated mRNA Degradation Pathway	1.46	0.0552	-0.333	AKT3,CNOT2,PAPOLA,PPM1J,PPP2R2B,PPP2R3A,PRKACA,TNFRSF11B,XRN1
HIF1α Signaling	0.928	0.0431	-0.333	AKT3,EIF4E,HSPA14,HSPA2,MMP15,PIK3CA,PIK3R3,RALA,RORC
WNT/β-catenin Signaling	2.53	0.069	-0.302	ACVR2B,AKT3,BCL9,CSNK1A1,DKK3,LRP6,NR5A2,PPM1J,PPP2R2B,PPP2R3A,TLE4,WNT9B
Osteoarthritis Pathway	1.89	0.0551	-0.302	CHUK,DDR2,FGFR3,IL1RL1,ITGAM,ITGAX,ITGB1,MEF2C,NOTCH1,PPARGC1A,PRKAA2,PRKAB2,SMAD2
Mitochondrial Dysfunction	0.475	0.032	-0.302	CACNB2,FBXW7,HTT,NDUFV1,PIK3CA,PIK3R3,PPARGC1A,PRKAA2,PRKAB2,PRKACA,RHOT1
IL-8 Signaling	2.72	0.0667	-0.277	AKT3,CHUK,GNB1,GPLD1,ITGAM,ITGAX,LIMK2,PIK3CA,PIK3R3,PLD2,RALA,RHOBTB1,RHOT1,VCAM1
Nuclear Cytoskeleton Signaling Pathway	2.13	0.0591	-0.277	ACTG1,BLK,CDH13,FGR,ITGAM,ITGAX,ITGB1,KIF25,KIF2A,KIF5B,NUP85,TUBA4A,TUBB4B
Opioid Signaling Pathway	1.99	0.0536	-0.258	ADCY5,AKT3,BLK,CACNB2,FGR,GNB1,GRIN2D,PENK,PLD2,PRKACA,RALA,RGS1,RGS5,RPS6KA1,RPS6KA3
Chaperone Mediated Autophagy Signaling Pathway	0	0.0268	-0.243	CHUK,DDX3X,EIF2AK3,HSPA14,HSPA2,HTT,KAT2B,LAMP2,MAPKAP1,MMP15,MST1,PIK3CA,PIK3R3,PRKAA2,PRKAB2,PRR5L,STING1
RHO GTPases Activate ROCKs	2.82	0.211	0	LIMK2,MYH11,PPP1R12A,PPP1R12B
Pancreatic Adenocarcinoma Signaling	2.63	0.0794	0	AKT3,GPLD1,NOTCH1,PIK3CA,PIK3R3,PLD2,RALA,RALGDS,RBL1,SMAD2
p53 Signaling	2.28	0.0816	0	ADGRB1,AKT3,GNL3,HIPK2,KAT2B,PIK3CA,PIK3R3,PMAIP1
Dilated Cardiomyopathy Signaling Pathway	2.09	0.0667	0	ACTG1,ADCY5,AKT3,CACNB2,DMD,MYH11,PDE2A,PDE3A,PRKACA,TNNT3
Neurovascular Coupling Signaling Pathway	1.59	0.0517	0	ADORA2A,CACNB2,GRIA1,GRIA4,GRIN2D,KCNJ2,NPR2,PLCB4,PLD2,PPP1R12A,PPP1R12B,PRKACA
HIPPO signaling	1.5	0.069	0	MST1,PPM1J,PPP1R12A,PPP2R2B,PPP2R3A,SMAD2
GPER1 signaling	1.47	0.0889	0	ADCY5,GNB1,ITGB1,PRKACA
Wound Healing Signaling Pathway	1.36	0.0476	0	ACVR2B,CHUK,COL11A2,COL4A6,F2,IL1RL1,ITGB1,LAMA2,LAMB1,MST1,RALA,TNFRSF11B
Signaling by EGFR	1.33	0.08	0	BTC,CSK,PIK3CA,PTPN12
Sperm Motility	1.31	0.0467	0	BLK,CSK,DDR2,FGFR3,FGR,GNB1,PDE2A,PEAK1,PLCB4,PLCH2,PRKACA,TNK1
Interleukin-3, Interleukin-5 and GM-CSF signaling	1.21	0.0727	0	PIK3CA,PIK3R3,PRKACA,SYNJ2
Endothelin-1 Signaling	1.08	0.0464	0	ADCY5,GPLD1,NPR2,PIK3CA,PIK3R3,PLCB4,PLCH2,PLD2,RALA
Processing of Capped Intron-Containing Pre-mRNA	1.03	0.0418	0	CASC3,CCAR1,CDC40,EIF4E,FYTTD1,GPATCH1,NUP85,NXF1,PAPOLA,RNPC3,SNRNP48,SRRM1
PXR/RXR Activation	0.997	0.0615	0	AKT3,PPARGC1A,PRKACA,UGT1A1
Regulation of Insulin-like Growth Factor (IGF) transport and uptake by IGFBPs	0.912	0.0484	0	F2,HRC,KTN1,LAMB1,PENK,SPP2
Caveolar-mediated Endocytosis Signaling	0.832	0.0533	0	ACTG1,ITGAM,ITGAX,ITGB1
GPCR-Mediated Integration of Enteroendocrine Signaling Exemplified by an L Cell	0.832	0.0533	0	ADCY5,PLCB4,PLCH2,PRKACA
RNA Polymerase II Transcription	0.657	0.0403	0	CASC3,CCNT1,CDC40,FYTTD1,PAPOLA,SRRM1
Opioid Signalling	0.64	0.0444	0	ADCY5,GNB1,PLCB4,PRKACA
Transcriptional regulation by RUNX1	0.632	0.0395	0	BLK,ELF2,GPAM,HIPK2,PHC3,SCMH1
MAPK6/MAPK4 signaling	0.618	0.0435	0	CDC14B,MOV10,PRKACA,TNRC6A
Death Receptor Signaling	0.577	0.0417	0	ACTG1,CFLAR,CHUK,XIAP
Salvage Pathways of Pyrimidine Ribonucleotides	0.567	0.0412	0	AK8,CSNK1A1,LIMK2,PRKAA2
Glycerophospholipid biosynthesis	0.548	0.0404	0	GPAM,OSBPL8,PLD2,SLC44A3
Sleep NREM Signaling Pathway	0.418	0.0348	0	ADCY5,ADORA2A,PRKACA,RALA
Gαs Signaling	0.348	0.0317	0	ADCY5,ADORA2A,GNB1,PRKACA
Gustation Pathway	0.322	0.0296	0	ADCY5,CACNB2,KCNQ3,LRRC8B,PDE3A,PRKACA
Androgen Signaling	0.312	0.0296	0	AR,CACNB2,GNB1,KAT2B,PRKACA
NFKBIE Signaling Pathway	0	0.00891	0	ANKRD28,CHUK,PPP6R3,TNFRSF11B
Epithelial Adherens Junction Signaling	3.4	0.0823	0.277	ACVR2B,AKT3,ARPC1A,LIMK2,MAGI1,MST1,NOTCH1,PPM1J,PPP2R2B,PPP2R3A,PRKAA2,PRKAB2,RALA
Dopamine-DARPP32 Feedback in cAMP Signaling	2.74	0.0699	0.302	ADCY5,ATF1,CACNB2,CSNK1A1,GRIN2D,KCNJ2,PLCB4,PLCH2,PPM1J,PPP1R12A,PPP2R2B,PPP2R3A,PRKACA
IL-12 Signaling and Production in Macrophages	1.32	0.0482	0.302	AKT3,CHUK,DDR2,ITGAM,MST1,NOD2,PIAS2,PIK3CA,PIK3R3,PRKAA2,PRKAB2
ESR-mediated signaling	2.3	0.0763	0.333	CCNT1,CHD1,GPAM,KAT2B,KAT5,MOV10,NR5A2,NRIP1,TNRC6A
Pulmonary Healing Signaling Pathway	1.02	0.0452	0.333	BLK,FGR,MMP15,NOTCH1,PRKAA2,PRKAB2,RALA,TNFRSF11B,WNT9B
Th2 Pathway	1.09	0.0511	0.378	ACVR2B,HLA-DQA2,IL1RL1,NOTCH1,PIK3CA,PIK3R3,TIMD4
Transcriptional Regulation by MECP2	2.8	0.111	0.447	HIPK2,HTT,MEF2C,MOV10,NOTCH1,PRKACA,TNRC6A
MYC Mediated Apoptosis Signaling	1.95	0.1	0.447	CFLAR,CHUK,PMAIP1,PRKACA,TNFRSF11B
UFMylation Signaling Pathway	1.58	0.0806	0.447	AKT3,EIF4E,EIF4G3,ELP5,KAT5
Semaphorin interactions	1.52	0.0781	0.447	ITGB1,LIMK2,MYH11,PLXNB1,TREM2
Integrin cell surface interactions	1.09	0.0588	0.447	COL4A6,ITGAM,ITGAX,ITGB1,VCAM1
ATM Signaling	0.864	0.05	0.447	ATF1,KAT5,PPM1J,PPP2R2B,PPP2R3A
Interleukin-4 and Interleukin-13 signaling	0.744	0.0455	0.447	ITGAM,ITGAX,ITGB1,RORC,VCAM1
Th1 Pathway	0.622	0.041	0.447	HLA-DQA2,IL27,NOTCH1,PIK3CA,PIK3R3
GABAergic Receptor Signaling Pathway (Enhanced)	0.485	0.036	0.447	ADCY5,CACNB2,GNB1,GRIN2D,PRKACA
Corticotropin Releasing Hormone Signaling	0.401	0.0329	0.447	ADCY5,CACNB2,MEF2C,NPR2,PRKACA
Docosahexaenoic Acid (DHA) Signaling	2.05	0.056	0.535	ADCY5,AKT3,EIF2AK3,PIK3CA,PIK3R3,PLCB4,PLCH2,PRKAA2,PRKAB2,PRKACA,STXBP5,SYNJ2,SYT17,TNFRSF11B
Cellular Effects of Sildenafil (Viagra)	2.35	0.0451	0.539	ACTG1,ACVR2B,ADCY5,ADGRA3,ADGRB1,ADORA2A,AKT3,CACNB2,CFLAR,FFAR2,GNB1,GPR17,HTR2A,KCNQ3,MEF2C,MYH11,NPR2,PDE3A,PIK3CA,PIK3R3,PPARGC1A,PPM1J,PPP1R12A,PPP1R12B,PPP2R2B,PPP2R3A,PRKAA2,PRKAB2,PRKACA,PTGFR,SMAD2
Systemic Lupus Erythematosus in T Cell Signaling Pathway	0	0.0187	0.577	AKT3,HLA-DQA2,PIK3CA,PIK3R3,PPM1J,PPP2R2B,PPP2R3A,RAB4A,RALA,RHOBTB1,RHOT1,RORC
Protein Sorting Signaling Pathway	1.62	0.0562	0.632	ADCY5,AP4E1,BLK,CLINT1,FGR,GOLGA4,GPLD1,MIA2,PLD2,PRKACA
Ceramide Signaling	3.08	0.0989	0.707	AKT3,NSMAF,PIK3CA,PIK3R3,PPM1J,PPP2R2B,PPP2R3A,RALA,TNFRSF11B
Endocannabinoid Cancer Inhibition Pathway	1.32	0.0544	0.707	ADCY5,AKT3,NSMAF,PIK3CA,PIK3R3,PRKAA2,PRKAB2,PRKACA
T Cell Exhaustion Signaling Pathway	0	0.0176	0.707	ACVR2B,AKT3,HLA-DQA2,PIK3CA,PIK3R3,PPM1J,PPP2R2B,PPP2R3A,RALA,SMAD2
ISG15 antiviral mechanism	1.9	0.0845	0.816	EIF4E,EIF4G3,KPNA1,NUP85,TRIM25,UBA7
SUMOylation of DNA damage response and repair proteins	1.76	0.0789	0.816	NUP85,PHC3,PIAS2,SCMH1,SMC5,XPC
PD-1, PD-L1 cancer immunotherapy pathway	1.57	0.0654	0.816	AKT3,CBLB,CSK,HLA-DQA2,PIK3CA,PIK3R3,TNFRSF11B
Factors involved in megakaryocyte development and platelet production	1.42	0.0659	0.816	CABLES1,DOCK3,DOCK4,GATA5,PRKACA,RBSN
p75 NTR receptor-mediated signalling	1.26	0.06	0.816	AKAP13,FGD2,MCF2L,RTN4,TIAM2,VAV3
PPAR Signaling	1.14	0.0561	0.816	CHUK,IL1RL1,NRIP1,PPARGC1A,RALA,TNFRSF11B
ROBO SLIT Signaling Pathway	0.876	0.0472	0.816	AKT3,ARPC1A,BLK,CABLES1,FGR,PRKACA
PPARα/RXRα Activation	3.54	0.0773	0.832	ACVR2B,ADCY5,CHUK,GHR,GK,IL1RL1,MEF2C,PLCB4,PLCH2,PPARGC1A,PRKAA2,PRKAB2,PRKACA,RALA,SMAD2
RAF/MAP kinase cascade	1.56	0.0496	0.832	ACTG1,BTC,CSK,DAB2IP,FGFR3,GRIN2D,NCAM1,NRG2,PIK3CA,RALGDS,RASGRP4,RGL3,SPRED2
Parkinson's Signaling Pathway	0.665	0.0358	0.905	ACTG1,ALDH1A2,CACNB2,EIF2AK3,GRIA1,GRIA4,GRIN2D,NDUFV1,PPARGC1A,TUBA4A,TUBB4B
Autophagy	4	0.0783	1	AKT3,BIRC6,DAPK2,EIF2AK3,KAT5,LAMP2,NOD2,PIK3CA,PIK3R3,PPM1J,PPP2R2B,PPP2R3A,PRKAA2,PRKAB2,PRKACA,RALA,TNFRSF11B
RHOGDI Signaling	2.53	0.0636	1	ACTG1,ARPC1A,CDH13,GNB1,ITGAM,ITGAX,ITGB1,LIMK2,MYH11,PIKFYVE,PPP1R12A,PPP1R12B,RHOBTB1,RHOT1
SUMOylation of chromatin organization proteins	1.18	0.0714	1	NUP85,PHC3,PIAS2,SCMH1
Coronavirus Pathogenesis Pathway	0.975	0.0441	1	AR,CHUK,EIF2AK3,EIF4E,PIKFYVE,RBL1,RPS12,STING1,TRIM25
Phospholipases	0.927	0.058	1	GPLD1,PLCB4,PLCH2,PLD2
Melatonin Signaling	0.878	0.0556	1	PLCB4,PLCH2,PRKACA,RORC
CTLA4 Signaling in Cytotoxic T Lymphocytes	0	0.0247	1.069	AKT3,BLK,CBLB,FGR,GPLD1,HLA-DQA2,ITGB1,PIK3CA,PIK3R3,PLD2,PPM1J,PPP2R2B,PPP2R3A,RALA,VAV3
Pathogen Induced Cytokine Storm Signaling Pathway	0	0.027	1.265	CCL21,CIITA,COL11A2,COL4A6,HLA-DQA2,IL1RL1,NOD2,RORC,STING1,TNFRSF11B
CLEAR Signaling Pathway	1.31	0.0456	1.387	AKT3,EIF2AK3,FGFR3,GHR,PPARGC1A,PPM1J,PPP2R2B,PPP2R3A,PRKAA2,PRKAB2,RALA,RRAGD,TNFRSF11B
Protein Kinase A Signaling	3.02	0.056	1.414	ADCY5,AKAP12,AKAP13,AKAP6,AKAP9,ANAPC5,ATF1,CDC14B,CHUK,EYA3,GDE1,GNB1,PALM2AKAP2,PDE2A,PDE3A,PHKB,PHKG2,PLCB4,PLCH2,PPP1R12A,PRKACA,PTPN12,UBASH3B
NAFLD Signaling Pathway	3.31	0.0708	1.5	ACACA,AKT3,CHUK,EIF2AK3,GPAM,PIK3CA,PIK3R3,PPARGC1A,PPM1J,PPP2R2B,PPP2R3A,PRKAA2,PRKAB2,SOCS7,TBC1D1,TNFRSF11B
ISGylation Signaling Pathway	1.13	0.0556	1.633	ITGB1,RTN4,STING1,TRIM25,UBA7,XIAP
Semaphorin Neuronal Repulsive Signaling Pathway	2.56	0.0733	1.667	AKT3,ITGAM,ITGAX,ITGB1,LIMK2,PIK3CA,PIK3R3,PLXNB1,PPP1R12A,PPP1R12B,PRKACA
G alpha (12/13) signalling events	2.22	0.0875	1.89	AKAP13,FGD2,GNB1,MCF2L,PLXNB1,TIAM2,VAV3
Interferon gamma signaling	1.85	0.0745	1.89	CIITA,HLA-DQA2,NCAM1,TRIM14,TRIM17,TRIM25,VCAM1
Heme signaling	2.06	0.106	2	CRTC1,CRTC3,MEF2C,NRIP1,PPARGC1A
Complement cascade	0.299	0.0296	2	C2,CFB,F2,MASP1
Multiple Sclerosis Signaling Pathway	0	0.018	2	C2,GRIN2D,HLA-DQA2,MASP1
Role of Osteoblasts in Rheumatoid Arthritis Signaling Pathway	0.885	0.041	2.121	ACVR2B,AKT3,CSNK1A1,LRP6,MMP15,PIK3CA,PIK3R3,SMURF2,TNFRSF11B,WNT9B
Apoptosis Signaling	0.813	0.0481	2.236	BIRC6,CHUK,RALA,RPS6KA1,XIAP
CDX Gastrointestinal Cancer Signaling Pathway	0	0.0248	2.236	AKT3,CHUK,PIK3CA,PIK3R3,WNT9B
PTEN Signaling	4.17	0.0927	2.714	AKT3,CHUK,FGFR3,FOXO6,GHR,ITGAM,ITGAX,ITGB1,MAGI1,PIK3CA,PIK3R3,PREX2,RALA,SYNJ2
Circadian Rhythm Signaling	2.94	0.0634	#NUM!	ADCY5,BLK,CACNB2,EIF4E,FGR,GNB1,GRIA1,GRIA4,GRIN2D,NPR2,PLCB4,PLCH2,PRKAA2,PRKAB2,PRKACA,RALA,RORC
Clathrin-mediated Endocytosis Signaling	2.76	0.0673	#NUM!	AAK1,ACTG1,AMPH,AP4E1,ARPC1A,F2,ITGB1,MYO6,PIK3CA,PIK3R3,RAB4A,SH3GLB2,SNAP91,TFRC
Complement System	2.51	0.135	#NUM!	C2,CFB,ITGAM,ITGAX,MASP1
Dopamine Receptor Signaling	2.22	0.0875	#NUM!	ADCY5,PPM1J,PPP1R12A,PPP2R2B,PPP2R3A,PRKACA,QDPR
Germ Cell-Sertoli Cell Junction Signaling	2.16	0.0647	#NUM!	ACTG1,CLINT1,ITGB1,LIMK2,PIK3CA,PIK3R3,RALA,RHOBTB1,RHOT1,TUBA4A,TUBB4B
Axonal Guidance Signaling	1.88	0.0451	#NUM!	ADAMTS13,AFG3L2,AKT3,ARPC1A,EIF4E,GNB1,ITGAM,ITGAX,ITGB1,LIMK2,MMP15,NTNG1,PIK3CA,PIK3R3,PLCB4,PLCH2,PLXNB1,PRKACA,RALA,RTN4,TUBA4A,TUBB4B,WNT9B
RHO GTPases activate CIT	1.85	0.158	#NUM!	MYH11,PPP1R12A,PPP1R12B
FOXO-mediated transcription	1.85	0.158	#NUM!	AKT3,FOXO6,KAT2B
Xenobiotic Metabolism Signaling	1.82	0.051	#NUM!	ALDH1A2,CHST3,EIF2AK3,GCLC,HS3ST5,NRIP1,PIK3CA,PIK3R3,PPARGC1A,PPM1J,PPP2R2B,PPP2R3A,RALA,SULT1B1,UGT1A1
RHO GTPases activate PAKs	1.73	0.143	#NUM!	MYH11,PPP1R12A,PPP1R12B
Synaptic adhesion-like molecules	1.73	0.143	#NUM!	GRIA1,GRIA4,GRIN2D
Miro GTPase Cycle	1.73	0.25	#NUM!	RHOT1,TRAK2
MSP-RON Signaling Pathway	1.69	0.0862	#NUM!	ACTG1,ITGAM,MST1,PIK3CA,PIK3R3
Role of Osteoblasts, Osteoclasts and Chondrocytes in Rheumatoid Arthritis	1.64	0.0526	#NUM!	ACVR2B,AKT3,CHUK,CSNK1A1,DKK3,IL1RL1,LRP6,PIK3CA,PIK3R3,TNFRSF11B,WNT9B,XIAP
Abacavir ADME	1.63	0.222	#NUM!	ABCG2,SLC22A3
Lipophagy	1.63	0.222	#NUM!	PRKAA2,PRKAB2
Apelin Cardiac Fibroblast Signaling Pathway	1.63	0.13	#NUM!	AKT3,PRKAA2,PRKAB2
Semaphorin Signaling in Neurons	1.6	0.082	#NUM!	ITGB1,LIMK2,PLXNB1,RHOBTB1,RHOT1
Glycogen metabolism	1.58	0.125	#NUM!	PHKB,PHKG2,UGP2
Calcium Transport I	1.54	0.2	#NUM!	ATP2B4,ATP2C1
D-myo-inositol (1,4,5)-Trisphosphate Biosynthesis	1.49	0.115	#NUM!	PIKFYVE,PLCB4,PLCH2
Glutamate Receptor Signaling	1.47	0.0758	#NUM!	GNB1,GRIA1,GRIA4,GRIN2D,HOMER1
RHO GTPases activate KTN1	1.46	0.182	#NUM!	KIF5B,KTN1
Remodeling of Epithelial Adherens Junctions	1.43	0.0735	#NUM!	ACTG1,ARPC1A,RALA,TUBA4A,TUBB4B
RHO GTPases activate PKNs	1.4	0.107	#NUM!	MYH11,PPP1R12A,PPP1R12B
Regulation of the Epithelial-Mesenchymal Transition Pathway	1.39	0.0513	#NUM!	AKT3,BCL9,FGFR3,NOTCH1,PIK3CA,PIK3R3,RALA,SMAD2,WNT9B,ZEB2
Energy dependent regulation of mTOR by LKB1-AMPK	1.36	0.103	#NUM!	PRKAA2,PRKAB2,RRAGD
EGR2 and SOX10-mediated initiation of Schwann cell myelination	1.36	0.103	#NUM!	LAMA2,LAMB1,NAB1
Transcriptional activity of SMAD2/SMAD3:SMAD4 heterotrimer	1.36	0.0816	#NUM!	CCNT1,RBL1,SMAD2,SMURF2
FOXO-mediated transcription of oxidative stress, metabolic and neuronal genes	1.33	0.1	#NUM!	FOXO6,PPARGC1A,SMAD2
Processing of SMDT1	1.33	0.154	#NUM!	AFG3L2,MICU3
Glucocorticoid Receptor Signaling	1.31	0.0395	#NUM!	AKT3,AR,CHUK,DCAF6,DNAH1,GHR,HLA-DQA2,HSPA14,HSPA2,IL17RE,IL1RL1,KAT2B,KRT80,NDUFV1,NRIP1,PIK3CA,PIK3R3,PRKAA2,PRKAB2,PRKACA,RALA,SMAD2,VCAM1
RHO GTPases activate IQGAPs	1.29	0.0968	#NUM!	ACTG1,TUBA4A,TUBB4B
Glutamate binding, activation of AMPA receptors and synaptic plasticity	1.26	0.0938	#NUM!	GRIA1,GRIA4,MYO6
Angiopoietin Signaling	1.25	0.0658	#NUM!	AKT3,CHUK,PIK3CA,PIK3R3,RALA
Tight Junction Signaling	1.24	0.05	#NUM!	ACTG1,AKT3,CLDN1,MYH11,PPM1J,PPP2R2B,PPP2R3A,PRKACA,TNFRSF11B
YAP1- and WWTR1 (TAZ)-stimulated gene expression	1.21	0.133	#NUM!	HIPK2,KAT2B
Choline Biosynthesis III	1.21	0.133	#NUM!	GPLD1,PLD2
Integration of energy metabolism	1.21	0.0583	#NUM!	ADCY5,CACNB2,GNB1,PRKAA2,PRKAB2,PRKACA
Cargo concentration in the ER	1.19	0.0882	#NUM!	FOLR1,GRIA1,MIA2
Triglyceride metabolism	1.19	0.0882	#NUM!	ABHD5,GK,PRKACA
Rap1 signalling	1.16	0.125	#NUM!	PRKACA,SIPA1
SUMOylation of DNA methylation proteins	1.16	0.125	#NUM!	PHC3,SCMH1
GPVI-mediated activation cascade	1.16	0.0857	#NUM!	PIK3CA,PIK3R3,VAV3
Striated Muscle Contraction	1.13	0.0833	#NUM!	DMD,TNNT3,TPM4
FLT3 Signaling	1.13	0.0833	#NUM!	AKT3,CSK,PIK3CA
Signaling by Activin	1.12	0.118	#NUM!	ACVR2B,SMAD2
Transcriptional regulation of pluripotent stem cells	1.12	0.118	#NUM!	PRDM14,SMAD2
α-Adrenergic Signaling	1.11	0.055	#NUM!	ADCY5,GNB1,PHKB,PHKG2,PRKACA,RALA
Regulation of NFE2L2 gene expression	1.1	0.333	#NUM!	NOTCH1
Glycine Biosynthesis III	1.1	0.333	#NUM!	AGXT
Glutathione Biosynthesis	1.1	0.333	#NUM!	GCLC
Biotin-carboxyl Carrier Protein Assembly	1.1	0.333	#NUM!	ACACA
Cell Cycle Regulation by BTG Family Proteins	1.08	0.0789	#NUM!	PPM1J,PPP2R2B,PPP2R3A
Metabolism of Angiotensinogen to Angiotensins	1.07	0.111	#NUM!	MME,REN
Branched-chain amino acid catabolism	1.07	0.111	#NUM!	BCKDHA,HIBCH
Gastrin-CREB signalling pathway via PKC and MAPK	1.07	0.111	#NUM!	RPS6KA1,RPS6KA3
Oxidative Stress Induced Senescence	1.07	0.0581	#NUM!	MOV10,PHC3,SCMH1,TNIK,TNRC6A
Regulation of TP53 Expression and Degradation	1.05	0.0769	#NUM!	AKT3,MAPKAP1,PRR5L
Transcriptional Regulation by VENTX	1.02	0.075	#NUM!	ANAPC5,MOV10,TNRC6A
Pyrimidine Ribonucleotides Interconversion	1.02	0.075	#NUM!	AK8,CTPS2,DDX3X
Th1 and Th2 Activation Pathway	1.01	0.0465	#NUM!	ACVR2B,HLA-DQA2,IL1RL1,IL27,NOTCH1,PIK3CA,PIK3R3,TIMD4
RET signaling	1	0.0732	#NUM!	PIK3CA,PIK3R3,PRKACA
Valine Degradation I	0.993	0.1	#NUM!	BCKDHA,HIBCH
PRPP Biosynthesis I	0.981	0.25	#NUM!	PRPS2
Branched-chain α-keto acid Dehydrogenase Complex	0.981	0.25	#NUM!	BCKDHA
Phenylalanine Degradation I (Aerobic)	0.981	0.25	#NUM!	QDPR
DAP12 interactions	0.977	0.0714	#NUM!	PIK3CA,TREM2,VAV3
Mitotic Roles of Polo-Like Kinase	0.961	0.0597	#NUM!	ANAPC5,PPM1J,PPP2R2B,PPP2R3A
p38 MAPK Signaling	0.961	0.05	#NUM!	ATF1,IL1RL1,MEF2C,RPS6KA1,RPS6KA3,RPS6KC1
Nucleotide salvage	0.957	0.0952	#NUM!	ADA,PUDP
Vasopressin regulates renal water homeostasis via Aquaporins	0.954	0.0698	#NUM!	ADCY5,GNB1,PRKACA
Assembly and cell surface presentation of NMDA receptors	0.954	0.0698	#NUM!	GRIN2D,TUBA4A,TUBB4B
Pyrimidine Ribonucleotides De Novo Biosynthesis	0.954	0.0698	#NUM!	AK8,CTPS2,DDX3X
Elastic fibre formation	0.931	0.0682	#NUM!	EFEMP1,ITGB1,LTBP2
TAK1-dependent IKK and NF-kappa-B activation	0.931	0.0682	#NUM!	CHUK,LRRC14,NOD2
TBC/RABGAPs	0.931	0.0682	#NUM!	RAB4A,RABGAP1,TBC1D15
Interconversion of nucleotide di- and triphosphates	0.923	0.0909	#NUM!	AK8,CTPS2
Signaling by NODAL	0.891	0.087	#NUM!	ACVR2B,SMAD2
Metabolism of porphyrins	0.891	0.087	#NUM!	ABCG2,UGT1A1
Formation of paraxial mesoderm	0.891	0.087	#NUM!	KAT2B,NOTCH1
Signaling by MST1	0.89	0.2	#NUM!	MST1
Interleukin-2 family signaling	0.889	0.0652	#NUM!	PIK3CA,PIK3R3,SYNJ2
SUMOylation of RNA binding proteins	0.889	0.0652	#NUM!	NUP85,PHC3,SCMH1
Role of OCT4 in Mammalian Embryonic Stem Cell Pluripotency	0.889	0.0652	#NUM!	NR5A2,PHC3,WWP2
tRNA Splicing	0.889	0.0652	#NUM!	GDE1,PDE2A,PDE3A
Regulation of RUNX1 Expression and Activity	0.861	0.0833	#NUM!	MOV10,TNRC6A
Granulocyte Adhesion and Diapedesis	0.84	0.0423	#NUM!	CCL21,CLDN1,IL1RL1,ITGAM,ITGB1,MMP15,TNFRSF11B,VCAM1
Signaling by NTRK2 (TRKB)	0.832	0.08	#NUM!	DOCK3,PIK3CA
Pre-NOTCH Expression and Processing	0.817	0.0526	#NUM!	KAT2B,MOV10,NOTCH1,TNRC6A
Glycerol Degradation I	0.817	0.167	#NUM!	GK
Selenocysteine Biosynthesis II (Archaea and Eukaryotes)	0.817	0.167	#NUM!	SEPSECS
Signaling by NOTCH3	0.811	0.06	#NUM!	KAT2B,NOTCH1,WWP2
NR1H2 and NR1H3-mediated signaling	0.811	0.06	#NUM!	MOV10,NRIP1,TNRC6A
Dermatan Sulfate Biosynthesis (Late Stages)	0.811	0.06	#NUM!	CHST3,HS3ST5,SULT1B1
Signaling by BMP	0.805	0.0769	#NUM!	ACVR2B,SMURF2
Hepatic Fibrosis / Hepatic Stellate Cell Activation	0.796	0.0412	#NUM!	CCL21,COL11A2,COL4A6,IL1RL1,MYH11,SMAD2,TNFRSF11B,VCAM1
Amyloid Processing	0.793	0.0588	#NUM!	AKT3,CSNK1A1,PRKACA
Cell Cycle: G2/M DNA Damage Checkpoint Regulation	0.793	0.0588	#NUM!	HIPK2,KAT2B,RPS6KA1
IL-7 Signaling Pathway	0.789	0.0513	#NUM!	AKT3,FOXO6,PIK3CA,PIK3R3
Cardiomyocyte Differentiation via BMP Receptors	0.779	0.0741	#NUM!	ACVR2B,MEF2C
Chondroitin Sulfate Biosynthesis (Late Stages)	0.758	0.0566	#NUM!	CHST3,HS3ST5,SULT1B1
Adenine and Adenosine Salvage III	0.756	0.143	#NUM!	ADA
Glycogen Biosynthesis II (from UDP-D-Glucose)	0.756	0.143	#NUM!	UGP2
MTOR signalling	0.754	0.0714	#NUM!	EIF4E,RRAGD
Glyoxylate metabolism and glycine degradation	0.754	0.0714	#NUM!	AGXT,BCKDHA
SUMOylation of intracellular receptors	0.754	0.0714	#NUM!	AR,PIAS2
CDP-diacylglycerol Biosynthesis I	0.754	0.0714	#NUM!	ABHD5,GPAM
Phototransduction Pathway	0.742	0.0556	#NUM!	GNB1,NPR2,PRKACA
Deadenylation-dependent mRNA decay	0.726	0.0545	#NUM!	CNOT2,EIF4E,XRN1
NLR signaling pathways	0.71	0.0536	#NUM!	CHUK,NOD2,PSTPIP1
EGF Signaling	0.71	0.0536	#NUM!	AKT3,PIK3CA,PIK3R3
Regulation of TP53 Activity through Acetylation	0.708	0.0667	#NUM!	AKT3,ING5
Phosphatidylglycerol Biosynthesis II (Non-plastidic)	0.708	0.0667	#NUM!	ABHD5,GPAM
Role of p14/p19ARF in Tumor Suppression	0.708	0.0667	#NUM!	PIK3CA,PIK3R3
Interleukin-17 signaling	0.703	0.125	#NUM!	IL17RE
TRAIL signaling	0.703	0.125	#NUM!	CFLAR
Inositol Pyrophosphates Biosynthesis	0.703	0.125	#NUM!	IP6K2
Purine Ribonucleosides Degradation to Ribose-1-phosphate	0.703	0.125	#NUM!	ADA
Neurexins and neuroligins	0.695	0.0526	#NUM!	GRIN2D,HOMER1,PDLIM5
Role of IL-17A in Arthritis	0.695	0.0526	#NUM!	PIK3CA,PIK3R3,RPS6KA1
Toll-like Receptor Cascades	0.686	0.0645	#NUM!	ITGAM,RBSN
Cyclins and Cell Cycle Regulation	0.685	0.0465	#NUM!	PPM1J,PPP2R2B,PPP2R3A,RBL1
Signaling by PDGF	0.68	0.0517	#NUM!	PIK3CA,PTPN12,THBS4
RUNX1 regulates megakaryocyte differentiation and platelet function	0.68	0.0517	#NUM!	KAT2B,MOV10,TNRC6A
Iron uptake and transport	0.68	0.0517	#NUM!	ABCG2,GLRX3,TFRC
Role of CHK Proteins in Cell Cycle Checkpoint Control	0.68	0.0517	#NUM!	PPM1J,PPP2R2B,PPP2R3A
G-protein beta:gamma signalling	0.666	0.0625	#NUM!	AKT3,GNB1
Thrombin signalling through proteinase activated receptors (PARs)	0.666	0.0625	#NUM!	F2,GNB1
RIPK1-mediated regulated necrosis	0.666	0.0625	#NUM!	CFLAR,XIAP
TNFR2 Signaling	0.666	0.0625	#NUM!	CHUK,XIAP
Dopamine Degradation	0.666	0.0625	#NUM!	ALDH1A2,SULT1B1
Signaling by ERBB4	0.665	0.0508	#NUM!	BTC,NRG2,PIK3CA
Folate Transformations I	0.658	0.111	#NUM!	MTHFR
GABA receptor activation	0.651	0.05	#NUM!	ADCY5,GNB1,KCNJ2
Activation of the pre-replicative complex	0.646	0.0606	#NUM!	DBF4,MCM4
Regulation of Cellular Mechanics by Calpain Protease	0.64	0.0444	#NUM!	ITGAM,ITGAX,ITGB1,RALA
Collagen degradation	0.637	0.0492	#NUM!	COL11A2,COL4A6,MMP15
Assembly of collagen fibrils and other multimeric structures	0.637	0.0492	#NUM!	COL11A2,COL4A6,DST
Chondroitin Sulfate Biosynthesis	0.637	0.0492	#NUM!	CHST3,HS3ST5,SULT1B1
BMP signaling pathway	0.629	0.044	#NUM!	ACVR2B,PRKACA,RALA,XIAP
Antimicrobial peptides	0.627	0.0588	#NUM!	ATOX1,CAMP
Oncogene Induced Senescence	0.627	0.0588	#NUM!	MOV10,TNRC6A
Neuroprotective Role of THOP1 in Alzheimer's Disease	0.622	0.041	#NUM!	LONP1,MASP1,MME,NTS,PRKACA
Caspase activation via Dependence Receptors in the absence of ligand	0.618	0.1	#NUM!	DAPK2
Thrombopoietin Signaling	0.611	0.0476	#NUM!	PIK3CA,PIK3R3,RALA
Dermatan Sulfate Biosynthesis	0.611	0.0476	#NUM!	CHST3,HS3ST5,SULT1B1
Transcriptional Regulation by NPAS4	0.609	0.0571	#NUM!	MOV10,TNRC6A
IL-9 Signaling	0.609	0.0571	#NUM!	PIK3CA,PIK3R3
Macroautophagy	0.586	0.0462	#NUM!	PRKAA2,PRKAB2,RRAGD
Induction of Apoptosis by HIV1	0.586	0.0462	#NUM!	CHUK,TNFRSF11B,XIAP
Pyridoxal 5'-phosphate Salvage Pathway	0.586	0.0462	#NUM!	CSNK1A1,LIMK2,PRKAA2
Phenylalanine and tyrosine metabolism	0.582	0.0909	#NUM!	QDPR
Transcriptional regulation by RUNX3	0.577	0.0417	#NUM!	KAT2B,NOTCH1,RORC,SMURF2
IL-1 Signaling	0.577	0.0417	#NUM!	ADCY5,CHUK,GNB1,PRKACA
Detoxification of Reactive Oxygen Species	0.574	0.0541	#NUM!	ATOX1,ERO1A
Gene and protein expression by JAK-STAT signaling after IL-12 stimulation	0.574	0.0541	#NUM!	LCP1,RALA
TWEAK Signaling	0.574	0.0541	#NUM!	CHUK,XIAP
Role of PI3K/AKT Signaling in the Pathogenesis of Influenza	0.573	0.0455	#NUM!	AKT3,PIK3CA,PIK3R3
Cellular response to heat stress	0.567	0.0412	#NUM!	COL4A6,HSPA14,HSPA2,NUP85
Phase II - Conjugation of compounds	0.561	0.0448	#NUM!	SULT1B1,UGP2,UGT1A1
SUMOylation of ubiquitinylation proteins	0.558	0.0526	#NUM!	NUP85,PIAS2
Notch Signaling	0.558	0.0526	#NUM!	DTX2,NOTCH1
Presynaptic depolarization and calcium channel opening	0.55	0.0833	#NUM!	CACNB2
γ-glutamyl Cycle	0.55	0.0833	#NUM!	GCLC
Formation of Fibrin Clot (Clotting Cascade)	0.542	0.0513	#NUM!	F2,PROCR
MAP kinase activation	0.542	0.0513	#NUM!	CHUK,NOD2
NGF-stimulated transcription	0.542	0.0513	#NUM!	ATF1,NAB1
Antigen Presentation Pathway	0.542	0.0513	#NUM!	CIITA,HLA-DQA2
Phagosome Maturation	0.54	0.0366	#NUM!	DYNC2H1,DYNLT2,LAMP2,PIKFYVE,TUBA4A,TUBB4B
Role of JAK1 and JAK3 in γc Cytokine Signaling	0.539	0.0435	#NUM!	PIK3CA,PIK3R3,RALA
Signaling by FGFR3	0.527	0.05	#NUM!	FGFR3,PIK3CA
Metabolism of folate and pterines	0.521	0.0769	#NUM!	MTHFR
Cytosolic iron-sulfur cluster assembly	0.521	0.0769	#NUM!	NUBP2
Platelet Aggregation (Plug Formation)	0.521	0.0769	#NUM!	F2
Mitochondrial calcium ion transport	0.521	0.0769	#NUM!	MICU3
Cleavage and Polyadenylation of Pre-mRNA	0.521	0.0769	#NUM!	PAPOLA
DAG and IP3 signaling	0.513	0.0488	#NUM!	ADCY5,PRKACA
Transport of vitamins, nucleosides, and related molecules	0.513	0.0488	#NUM!	LCN15,SLC29A4
Mechanisms of Viral Exit from Host Cells	0.513	0.0488	#NUM!	ACTG1,SH3GLB2
Sumoylation Pathway	0.512	0.0388	#NUM!	AR,RHOBTB1,RHOT1,XIAP
Ephrin B Signaling	0.506	0.0417	#NUM!	ABI1,GNB1,VAV3
Formation of WDR5-containing histone-modifying complexes	0.499	0.0476	#NUM!	KAT2B,KDM6A
Intrinsic Prothrombin Activation Pathway	0.499	0.0476	#NUM!	COL11A2,F2
Thyroid Hormone Metabolism II (via Conjugation and/or Degradation)	0.499	0.0476	#NUM!	SULT1B1,UGT1A1
NRF2-mediated Oxidative Stress Response	0.498	0.0338	#NUM!	ACTG1,DNAJB13,DNAJB7,EIF2AK3,GCLC,PIK3CA,PIK3R3,RALA
Senescence-Associated Secretory Phenotype (SASP)	0.496	0.0411	#NUM!	ANAPC5,RPS6KA1,RPS6KA3
Serotonin Degradation	0.496	0.0411	#NUM!	ALDH1A2,SULT1B1,UGT1A1
Regulation of TP53 Activity through Association with Co-factors	0.494	0.0714	#NUM!	AKT3
Formation of axial mesoderm	0.494	0.0714	#NUM!	SMAD2
DNA Double-Strand Break Repair by Homologous Recombination	0.494	0.0714	#NUM!	ATRX
Colanic Acid Building Blocks Biosynthesis	0.494	0.0714	#NUM!	UGP2
Signaling by SCF-KIT	0.485	0.0465	#NUM!	PIK3CA,PIK3R3
Smooth Muscle Contraction	0.485	0.0465	#NUM!	MYH11,TPM4
Aggrephagy	0.485	0.0465	#NUM!	TUBA4A,TUBB4B
PI3K Cascade	0.472	0.0455	#NUM!	FGFR3,PIK3CA
Regulation of mRNA stability by proteins that bind AU-rich elements	0.472	0.0455	#NUM!	KHSRP,XRN1
Signaling by Retinoic Acid	0.472	0.0455	#NUM!	ALDH1A2,PDK3
Collagen chain trimerization	0.472	0.0455	#NUM!	COL11A2,COL4A6
Mismatch Repair	0.47	0.0667	#NUM!	MSH3
Platelet Adhesion to exposed collagen	0.47	0.0667	#NUM!	ITGB1
Response of EIF2AK1 (HRI) to heme deficiency	0.47	0.0667	#NUM!	PPP1R15A
GDNF Family Ligand-Receptor Interactions	0.466	0.0395	#NUM!	PIK3CA,PIK3R3,RALA
Agranulocyte Adhesion and Diapedesis	0.46	0.0333	#NUM!	ACTG1,CCL21,CLDN1,ITGB1,MMP15,MYH11,VCAM1
Coronavirus Replication Pathway	0.46	0.0444	#NUM!	TUBA4A,TUBB4B
Kinetochore Metaphase Signaling Pathway	0.455	0.0364	#NUM!	ANAPC5,DNAH1,KAT5,PPP1R12A
Prolactin receptor signaling	0.448	0.0625	#NUM!	GHR
Caspase activation via Death Receptors in the presence of ligand	0.448	0.0625	#NUM!	CFLAR
Extrinsic Prothrombin Activation Pathway	0.448	0.0625	#NUM!	F2
Chondroitin Sulfate Degradation (Metazoa)	0.448	0.0625	#NUM!	HYAL4
D-myo-inositol (1,4,5)-trisphosphate Degradation	0.448	0.0625	#NUM!	SYNJ2
Adenosine Nucleotides Degradation II	0.448	0.0625	#NUM!	ADA
Cytosolic sensors of pathogen-associated DNA	0.447	0.0435	#NUM!	CHUK,STING1
Role of RIG1-like Receptors in Antiviral Innate Immunity	0.447	0.0435	#NUM!	CHUK,TRIM25
DNA damage-induced 14-3-3σ Signaling	0.447	0.0435	#NUM!	AKT3,COP1
DDX58/IFIH1-mediated induction of interferon-alpha/beta	0.439	0.038	#NUM!	CHUK,TRIM25,UBA7
Sensory perception of taste	0.436	0.0426	#NUM!	GNB1,KCNJ2
Role of IL-17F in Allergic Inflammatory Airway Diseases	0.436	0.0426	#NUM!	RPS6KA1,RPS6KA3
Signaling by Type 1 Insulin-like Growth Factor 1 Receptor (IGF1R)	0.427	0.0588	#NUM!	PIK3CA
Signaling by NTRK3 (TRKC)	0.427	0.0588	#NUM!	PIK3CA
FOXO-mediated transcription of cell cycle genes	0.427	0.0588	#NUM!	SMAD2
Germ layer formation at gastrulation	0.427	0.0588	#NUM!	SMAD2
RAN Signaling	0.427	0.0588	#NUM!	KPNA1
1D-myo-inositol Hexakisphosphate Biosynthesis II (Mammalian)	0.427	0.0588	#NUM!	SYNJ2
Dermatan Sulfate Degradation (Metazoa)	0.427	0.0588	#NUM!	HYAL4
D-myo-inositol (1,3,4)-trisphosphate Biosynthesis	0.427	0.0588	#NUM!	SYNJ2
G alpha (z) signalling events	0.424	0.0417	#NUM!	ADCY5,GNB1
DNA Damage Bypass	0.424	0.0417	#NUM!	TRIM25,UBA7
nNOS Signaling in Skeletal Muscle Cells	0.424	0.0417	#NUM!	CACNB2,DMD
Nonhomologous End-Joining (NHEJ)	0.413	0.0408	#NUM!	KAT5,RIF1
TP53 Regulates Transcription of Cell Cycle Genes	0.413	0.0408	#NUM!	CNOT2,RBL1
Bladder Cancer Signaling	0.411	0.0345	#NUM!	FGFR3,MMP15,RALA,RBL1
Unfolded Protein Response (UPR)	0.408	0.0556	#NUM!	EIF2AK3
Formation of definitive endoderm	0.408	0.0556	#NUM!	SMAD2
Mismatch Repair in Eukaryotes	0.408	0.0556	#NUM!	MSH3
RNA polymerase II transcribes snRNA genes	0.405	0.0361	#NUM!	CCNT1,ICE2,ZC3H8
Signaling by NOTCH4	0.405	0.0361	#NUM!	FBXW7,KAT2B,NOTCH1
Signaling by FGFR1	0.402	0.04	#NUM!	PIK3CA,SPRED2
Heparan Sulfate Biosynthesis (Late Stages)	0.397	0.0357	#NUM!	CHST3,HS3ST5,SULT1B1
Transcriptional regulation by RUNX2	0.392	0.0392	#NUM!	AKT3,AR
TNFR1 Signaling	0.392	0.0392	#NUM!	CHUK,XIAP
NFE2L2 regulating anti-oxidant/detoxification enzymes	0.389	0.0526	#NUM!	GCLC
Purine Nucleotides Degradation II (Aerobic)	0.389	0.0526	#NUM!	ADA
B-WICH complex positively regulates rRNA expression	0.382	0.0385	#NUM!	DDX21,KAT2B
Regulation of the Epithelial Mesenchymal Transition in Development Pathway	0.374	0.0345	#NUM!	BCL9,NOTCH1,WNT9B
Signaling by Hippo	0.373	0.05	#NUM!	AMOTL1
SUMOylation of transcription factors	0.373	0.05	#NUM!	PIAS2
Receptor-type tyrosine-protein phosphatases	0.373	0.05	#NUM!	PPFIBP1
Interleukin-12 family signaling	0.373	0.05	#NUM!	IL27
Inflammasome pathway	0.373	0.05	#NUM!	NOD2
Interleukin-7 signaling	0.357	0.0476	#NUM!	PIK3R3
Histamine Degradation	0.357	0.0476	#NUM!	ALDH1A2
Fatty Acid α-oxidation	0.357	0.0476	#NUM!	ALDH1A2
Endoplasmic Reticulum Stress Pathway	0.357	0.0476	#NUM!	EIF2AK3
Signaling by PTK6	0.353	0.0364	#NUM!	BTC,NRG2
Heparan Sulfate Biosynthesis	0.345	0.033	#NUM!	CHST3,HS3ST5,SULT1B1
CSDE1 Signaling Pathway	0.345	0.0357	#NUM!	AKT3,CSDE1
DNA Damage/Telomere Stress Induced Senescence	0.345	0.0357	#NUM!	HIRA,KAT5
Folate Signaling Pathway	0.345	0.0357	#NUM!	FOLR1,MTHFR
Cell Cycle Control of Chromosomal Replication	0.345	0.0357	#NUM!	DBF4,MCM4
Triacylglycerol Biosynthesis	0.345	0.0357	#NUM!	ABHD5,GPAM
Cellular hexose transport	0.342	0.0455	#NUM!	SLC5A9
Peroxisomal lipid metabolism	0.342	0.0455	#NUM!	ACBD4
Chaperone Mediated Autophagy	0.342	0.0455	#NUM!	LAMP2
Superpathway of D-myo-inositol (1,4,5)-trisphosphate Metabolism	0.342	0.0455	#NUM!	SYNJ2
Putrescine Degradation III	0.342	0.0455	#NUM!	ALDH1A2
Nephrin family interactions	0.328	0.0435	#NUM!	PIK3CA
Surfactant metabolism	0.328	0.0435	#NUM!	ADORA2A
Pyrimidine Deoxyribonucleotides De Novo Biosynthesis I	0.328	0.0435	#NUM!	AK8
Vitamin-C Transport	0.328	0.0435	#NUM!	LRRC8B
DNA Double Strand Break Response	0.319	0.0339	#NUM!	EYA3,KAT5
Mitochondrial Fatty Acid Beta-Oxidation	0.315	0.0417	#NUM!	ACSM3
Growth hormone receptor signaling	0.315	0.0417	#NUM!	GHR
IL-22 Signaling	0.315	0.0417	#NUM!	AKT3
GABA Receptor Signaling	0.315	0.0303	#NUM!	ADCY5,CACNB2,GNB1,KCNQ3
Visual phototransduction	0.311	0.0333	#NUM!	GNB1,PPEF1
NIK-->noncanonical NF-kB signaling	0.311	0.0333	#NUM!	CHUK,UBA3
GADD45 Signaling	0.311	0.0333	#NUM!	ACVR2B,SMAD2
PCP (Planar Cell Polarity) Pathway	0.311	0.0333	#NUM!	DAAM1,WNT9B
NCAM signaling for neurite out-growth	0.304	0.0328	#NUM!	CACNB2,NCAM1
Primary Immunodeficiency Signaling	0.304	0.0328	#NUM!	ADA,CIITA
Insulin processing	0.303	0.04	#NUM!	KIF5B
Incretin synthesis, secretion, and inactivation	0.303	0.04	#NUM!	GNB1
MyD88 cascade initiated on plasma membrane	0.303	0.04	#NUM!	CHUK
Signaling by Erythropoietin	0.303	0.04	#NUM!	PIK3CA
Ethanol Degradation IV	0.303	0.04	#NUM!	ALDH1A2
WNT ligand biogenesis and trafficking	0.291	0.0385	#NUM!	WNT9B
Miscellaneous transport and binding events	0.291	0.0385	#NUM!	LRRC8B
Estrogen-mediated S-phase Entry	0.291	0.0385	#NUM!	RBL1
Ubiquinol-10 Biosynthesis (Eukaryotic)	0.291	0.0385	#NUM!	BCKDHA
Peroxisomal protein import	0.289	0.0317	#NUM!	AGXT,MLYCD
Melatonin Degradation I	0.282	0.0312	#NUM!	SULT1B1,UGT1A1
BMAL1:CLOCK,NPAS2 activates circadian gene expression	0.28	0.037	#NUM!	KLF15
Syndecan interactions	0.28	0.037	#NUM!	ITGB1
Integrin signaling	0.28	0.037	#NUM!	CSK
ATF4 activates genes in response to endoplasmic reticulum stress	0.28	0.037	#NUM!	KHSRP
Fatty acyl-CoA biosynthesis	0.28	0.037	#NUM!	ACACA
Tryptophan Degradation X (Mammalian, via Tryptamine)	0.28	0.037	#NUM!	ALDH1A2
RAB geranylgeranylation	0.275	0.0308	#NUM!	RAB27B,RAB4A
Signaling by ALK	0.269	0.0357	#NUM!	PIK3CA
Activated PKN1 stimulates transcription of AR regulated genes KLK2 and KLK3	0.269	0.0357	#NUM!	AR
Degradation of the extracellular matrix	0.268	0.0303	#NUM!	LAMB1,MMP15
WNT/Ca+ pathway	0.268	0.0303	#NUM!	PLCB4,PLCH2
DNA Replication Pre-Initiation	0.267	0.0288	#NUM!	ANAPC5,KPNA1,MCM4
Collagen biosynthesis and modifying enzymes	0.262	0.0299	#NUM!	COL11A2,COL4A6
Myogenesis	0.259	0.0345	#NUM!	MEF2C
TNFs bind their physiological receptors	0.259	0.0345	#NUM!	TNFRSF11B
Processing of Capped Intronless Pre-mRNA	0.259	0.0345	#NUM!	PAPOLA
Activation of kainate receptors upon glutamate binding	0.25	0.0333	#NUM!	GNB1
Protein ubiquitination	0.25	0.0333	#NUM!	UBE2Q2
Sensory processing of sound by inner hair cells of the cochlea	0.249	0.029	#NUM!	ACTG1,CACNB2
Superpathway of Melatonin Degradation	0.249	0.029	#NUM!	SULT1B1,UGT1A1
Cell Cycle: G1/S Checkpoint Regulation	0.249	0.029	#NUM!	GNL3,RBL1
TP53 Regulates Transcription of DNA Repair Genes	0.243	0.0286	#NUM!	CCNT1,RAD51D
Bile acid and bile salt metabolism	0.24	0.0323	#NUM!	OSBPL6
Asparagine N-linked glycosylation	0.24	0.0323	#NUM!	FUT8
Signaling by CSF1 (M-CSF) in myeloid cells	0.24	0.0323	#NUM!	PIK3CA
MyD88 dependent cascade initiated on endosome	0.24	0.0323	#NUM!	CHUK
Sonic Hedgehog Signaling	0.24	0.0323	#NUM!	PRKACA
Interferon alpha/beta signaling	0.237	0.0282	#NUM!	IP6K2,KPNA1
Toll Like Receptor 3 (TLR3) Cascade	0.232	0.0312	#NUM!	CHUK
Regulation of RUNX2 expression and activity	0.226	0.0274	#NUM!	FBXW7,PPARGC1A
Activation of Matrix Metalloproteinases	0.224	0.0303	#NUM!	MMP15
Signal amplification	0.224	0.0303	#NUM!	GNB1
SUMOylation of SUMOylation proteins	0.216	0.0294	#NUM!	NUP85
Transcriptional Regulation by E2F6	0.216	0.0294	#NUM!	PHC3
4-1BB Signaling in T Lymphocytes	0.216	0.0294	#NUM!	CHUK
Inhibition of Angiogenesis by TSP1	0.216	0.0294	#NUM!	AKT3
Oxytocin in Spinal Neurons Signaling Pathway	0.208	0.0286	#NUM!	NPR2
PRC2 methylates histones and DNA	0.208	0.0286	#NUM!	PHF1
Coagulation System	0.208	0.0286	#NUM!	F2
Ethanol Degradation II	0.208	0.0286	#NUM!	ALDH1A2
Nucleotide Excision Repair Pathway	0.208	0.0286	#NUM!	XPC
Transcriptional regulation by the AP-2 (TFAP2) family of transcription factors	0.201	0.0278	#NUM!	HSPD1
Pyroptosis Signaling Pathway	0	0.0213	#NUM!	PRKACA,TNFRSF11B
Macrophage Classical Activation Signaling Pathway	0	0.0159	#NUM!	CHUK,CIITA,HLA-DQA2
Aryl Hydrocarbon Receptor Signaling	0	0.0189	#NUM!	ALDH1A2,NRIP1,RBL1
Signaling by Insulin receptor	0	0.0233	#NUM!	PIK3CA
Neurotransmitter release cycle	0	0.025	#NUM!	UNC13B
Meiotic synapsis	0	0.0182	#NUM!	HSPA2
Mitochondrial protein import	0	0.0156	#NUM!	HSPD1
The citric acid (TCA) cycle and respiratory electron transport	0	0.0182	#NUM!	PDK3
Eukaryotic Translation Elongation	0	0.0211	#NUM!	RPL18,RPS12
Electron transport, ATP synthesis, and heat production by uncoupling proteins	0	0.00781	#NUM!	NDUFV1
Gamma carboxylation, hypusine formation and arylsulfatase activation	0	0.0244	#NUM!	F2
MyD88:MAL(TIRAP) cascade initiated on plasma membrane	0	0.0238	#NUM!	CHUK
MyD88-independent TLR4 cascade	0	0.027	#NUM!	CHUK
Plasma lipoprotein assembly, remodeling, and clearance	0	0.0263	#NUM!	HDLBP,PRKACA
SRP-dependent cotranslational protein targeting to membrane	0	0.0174	#NUM!	RPL18,RPS12
Metabolism of non-coding RNA	0	0.0182	#NUM!	NUP85
Degradation of beta-catenin by the destruction complex	0	0.0217	#NUM!	CSNK1A1,TLE4
Metabolism of water-soluble vitamins and cofactors	0	0.0169	#NUM!	ACACA
Gene Silencing by RNA	0	0.0211	#NUM!	NUP85,TNRC6A
Binding and Uptake of Ligands by Scavenger Receptors	0	0.00893	#NUM!	MASP1
Selenoamino acid metabolism	0	0.0187	#NUM!	RPL18,RPS12
Activation of gene expression by SREBF (SREBP)	0	0.0244	#NUM!	GPAM
Class B/2 (Secretin family receptors)	0	0.0208	#NUM!	GNB1,WNT9B
Signaling by ROBO receptors	0	0.0172	#NUM!	EVL,PRKACA
Transcriptional regulation of white adipocyte differentiation	0	0.0119	#NUM!	PPARGC1A
Olfactory Signaling Pathway	0	0.0135	#NUM!	GNB1
ABC-family proteins mediated transport	0	0.0099	#NUM!	ABCF1
Regulation of lipid metabolism by PPARalpha	0	0.0168	#NUM!	PPARGC1A,TIAM2
Transport of inorganic cations/anions and amino acids/oligopeptides	0	0.00962	#NUM!	SLC7A8
Sphingolipid metabolism	0	0.023	#NUM!	GALC,HYAL4
Regulation of mitotic cell cycle	0	0.0114	#NUM!	ANAPC5
Mitotic G1 phase and G1/S transition	0	0.0229	#NUM!	AKT3,CABLES1,RBL1
SUMOylation of DNA replication proteins	0	0.0222	#NUM!	NUP85
O-linked glycosylation	0	0.00901	#NUM!	ADAMTS13
Hedgehog ligand biogenesis	0	0.0154	#NUM!	SCUBE2
Mitochondrial translation	0	0.0104	#NUM!	MRPS5
Activation of anterior HOX genes in hindbrain during early embryogenesis	0	0.0247	#NUM!	KDM6A,PIAS2
C-type lectin receptors (CLRs)	0	0.0207	#NUM!	CHUK,PRKACA,UBA3
TP53 Regulates Transcription of Cell Death Genes	0	0.0227	#NUM!	PMAIP1
Signaling by FGFR2	0	0.0137	#NUM!	PIK3CA
Signaling by FGFR4	0	0.0244	#NUM!	PIK3CA
HDR through Homologous Recombination (HRR) or Single Strand Annealing (SSA)	0	0.0179	#NUM!	KAT5,RAD51D
Nucleotide Excision Repair	0	0.0103	#NUM!	XPC
Fanconi Anemia Pathway	0	0.0263	#NUM!	FAN1
Keratinization	0	0.014	#NUM!	KRT80,PKP2,TCHH
Mitotic Prophase	0	0.00971	#NUM!	NUP85
Synthesis of DNA	0	0.0168	#NUM!	ANAPC5,MCM4
S Phase	0	0.02	#NUM!	AKT3,CABLES1
Glucose metabolism	0	0.025	#NUM!	NUP85,PRKACA
Eukaryotic Translation Initiation	0	0.0246	#NUM!	EIF4E,RPL18,RPS12
Eukaryotic Translation Termination	0	0.0213	#NUM!	RPL18,RPS12
RNA Polymerase I Transcription	0	0.02	#NUM!	KAT2B
Apoptotic execution phase	0	0.0192	#NUM!	KPNA1
Nonsense-Mediated Decay (NMD)	0	0.0256	#NUM!	CASC3,RPL18,RPS12
Response of EIF2AK4 (GCN2) to amino acid deficiency	0	0.0194	#NUM!	RPL18,RPS12
Amino acids regulate mTORC1	0	0.0182	#NUM!	RRAGD
Sensory processing of sound by outer hair cells of the cochlea	0	0.0182	#NUM!	ACTG1
KEAP1-NFE2L2 pathway	0	0.011	#NUM!	AKT3
Signaling by the B Cell Receptor (BCR)	0	0.0118	#NUM!	BLK,CHUK
LXR/RXR Activation	0	0.0244	#NUM!	ACACA,IL1RL1,TNFRSF11B
CGAS-STING Signaling Pathway	0	0.0214	#NUM!	CHUK,EIF2AK3,STING1
VDR/RXR Activation	0	0.0256	#NUM!	CAMP,IL1RL1
Role of BRCA1 in DNA Damage Response	0	0.025	#NUM!	ATF1,RBL1
Activation of IRF by Cytosolic Pattern Recognition Receptors	0	0.0154	#NUM!	CHUK
Role of Pattern Recognition Receptors in Recognition of Bacteria and Viruses	0	0.0256	#NUM!	NOD2,PIK3CA,PIK3R3,PTX3
Role of PKR in Interferon Induction and Antiviral Response	0	0.0221	#NUM!	CHUK,HSPA14,HSPA2
FcγRIIB Signaling in B Lymphocytes	0	0.00753	#NUM!	CACNB2,PIK3CA,PIK3R3,RALA
CCR5 Signaling in Macrophages	0	0.00401	#NUM!	CACNB2,GNB1
Calcium-induced T Lymphocyte Apoptosis	0	0.00217	#NUM!	HLA-DQA2
CD27 Signaling in Lymphocytes	0	0.0175	#NUM!	CHUK
Airway Pathology in Chronic Obstructive Pulmonary Disease	0	0.00847	#NUM!	LCN15
B Cell Activating Factor Signaling	0	0.0233	#NUM!	CHUK
T Helper Cell Differentiation	0	0.00637	#NUM!	HLA-DQA2,RORC,TNFRSF11B
Oncostatin M Signaling	0	0.0233	#NUM!	RALA
Role of Cytokines in Mediating Communication between Immune Cells	0	0.0185	#NUM!	IL27
Lipid Antigen Presentation by CD1	0	0.00241	#NUM!	CD1B
Maturity Onset Diabetes of Young (MODY) Signaling	0	0.0253	#NUM!	BLK,CACNB2
Polyamine Regulation in Colon Cancer	0	0.0169	#NUM!	AKT3
DNA Methylation and Transcriptional Repression Signaling	0	0.0204	#NUM!	RBL1,TET1
Type I Diabetes Mellitus Signaling	0	0.00982	#NUM!	CHUK,HLA-DQA2,HSPD1,SOCS7,TNFRSF11B
Basal Cell Carcinoma Signaling	0	0.0139	#NUM!	WNT9B
Allograft Rejection Signaling	0	0.00205	#NUM!	HLA-DQA2
Autoimmune Thyroid Disease Signaling	0	0.00218	#NUM!	HLA-DQA2
Graft-versus-Host Disease Signaling	0	0.00224	#NUM!	HLA-DQA2
G Protein Signaling Mediated by Tubby	0	0.00641	#NUM!	GNB1,PLCB4,VAV3
Crosstalk between Dendritic Cells and Natural Killer Cells	0	0.022	#NUM!	ACTG1,TREM2
Systemic Lupus Erythematosus Signaling	0	0.00563	#NUM!	AKT3,PIK3CA,PIK3R3,RALA,RNPC3,SNRNP48
April Mediated Signaling	0	0.0238	#NUM!	CHUK
Retinoic acid Mediated Apoptosis Signaling	0	0.0167	#NUM!	CFLAR
Altered T Cell and B Cell Signaling in Rheumatoid Arthritis	0	0.0032	#NUM!	CCL21,CHUK,HLA-DQA2
Atherosclerosis Signaling	0	0.015	#NUM!	COL11A2,VCAM1
B Cell Development	0	0.00205	#NUM!	HLA-DQA2
Granzyme A Signaling	0	0.0135	#NUM!	NDUFV1
Role of WNT/GSK-3β Signaling in the Pathogenesis of Influenza	0	0.0256	#NUM!	CSNK1A1,WNT9B
NUR77 Signaling in T Lymphocytes	0	0.0039	#NUM!	HLA-DQA2,RPS6KA3
Role of MAPK Signaling in the Pathogenesis of Influenza	0	0.0238	#NUM!	AKT3,RALA
Antiproliferative Role of TOB in T Cell Signaling	0	0.00469	#NUM!	RPS6KA1,SMAD2
OX40 Signaling Pathway	0	0.00209	#NUM!	HLA-DQA2
Spliceosomal Cycle	0	0.0189	#NUM!	CASC3
IL-17A Signaling in Fibroblasts	0	0.025	#NUM!	CHUK,VCAM1
Role of JAK2 in Hormone-like Cytokine Signaling	0	0.0161	#NUM!	GHR
Role of JAK family kinases in IL-6-type Cytokine Signaling	0	0.0127	#NUM!	IL27
iNOS Signaling	0	0.0213	#NUM!	CHUK
nNOS Signaling in Neurons	0	0.0213	#NUM!	GRIN2D
Retinoate Biosynthesis I	0	0.0233	#NUM!	ALDH1A2
Nicotine Degradation III	0	0.0167	#NUM!	UGT1A1
tRNA Charging	0	0.0256	#NUM!	FARS2
Nicotine Degradation II	0	0.0147	#NUM!	UGT1A1
Noradrenaline and Adrenaline Degradation	0	0.027	#NUM!	ALDH1A2
Oxidative Ethanol Degradation III	0	0.0179	#NUM!	ALDH1A2
Inhibition of Matrix Metalloproteases	0	0.0256	#NUM!	MMP15
UVC-Induced MAPK Signaling	0	0.0196	#NUM!	RALA
Oxidative Phosphorylation	0	0.00893	#NUM!	NDUFV1
Toll-like Receptor Signaling	0	0.0256	#NUM!	CHUK,IL1RL1
Hypoxia Signaling in the Cardiovascular System	0	0.0263	#NUM!	BIRC6,UBE2Q2
Iron homeostasis signaling pathway	0	0.0217	#NUM!	NUBP2,SMAD2,TFRC
Th17 Activation Pathway	0	0.00207	#NUM!	RORC
SPINK1 Pancreatic Cancer Pathway	0	0.0167	#NUM!	SMAD2
NER (Nucleotide Excision Repair, Enhanced Pathway)	0	0.011	#NUM!	XPC
BAG2 Signaling Pathway	0	0.0235	#NUM!	HSPA14,HSPA2
FAT10 Signaling Pathway	0	0.0175	#NUM!	HTT
PFKFB4 Signaling Pathway	0	0.0204	#NUM!	PRKACA
Role of MAPK Signaling in Promoting the Pathogenesis of Influenza	0	0.0175	#NUM!	RALA,RPS6KA3
Role of MAPK Signaling in Inhibiting the Pathogenesis of Influenza	0	0.0127	#NUM!	RPS6KA3
© 2000-2024 QIAGEN. All rights reserved.

## Sheet: Table S3 (Upstream Regulator)
Upstream Regulator	Expr Log Ratio	Molecule Type	Predicted Activation State	Activation z-score	p-value of overlap	Target Molecules in Dataset	Mechanistic Network
© 2000-2025 QIAGEN. All rights reserved.
Upstream Regulator		Molecule Type	Predicted Activation State	Activation z-score		Target Molecules in Dataset
OSM	-1.01	cytokine	Inhibited	-3.198	0.0873	ATP13A3,ATP2B4,BTC,CAMP,CFB,CHD1,CLPX,DNAH17,GAS7,HIPK3,HSPA2,KIF5B,NRIP1,PDLIM5,PLCB4,RAB4A,SBNO2,SLC7A8,TNFRSF11B,UGT1A1,VCAM1
ESR1	-0.751	ligand-dependent nuclear receptor	Inhibited	-3.183	1.54e-07	ABCG2,ACACA,ADA,ADAMTS13,AKAP13,ANAPC5,AR,ATOX1,CCAR1,CCP110,CDC42BPA,CEP135,CLDN1,CSNK1A1,DDX21,DOCK4,DST,DTNA,EFEMP1,FBXW7,FOLR1,GAS7,GHR,GNB1,GPAM,GRIA1,HIPK2,HSPA2,HSPD1,KIF5B,KTN1,LAMB1,MAGI1,MAP3K20,MCF2L,MME,MST1,MYH11,MYO6,NCKAP1,NEK1,NOTCH1,NRIP1,PDLIM5,PITX1,PMAIP1,PPARGC1A,PPP1R12A,PTX3,RALA,RBL1,REN,RORC,RTN2,SCAMP1,SCUBE2,SH3GLB2,SLC7A8,SMAD2,SMURF2,TAGLN,TFRC,THBS4,TNFRSF11B,TNS3,TS…	217 (12)
D-glucose		chemical - endogenous mammalian	Inhibited	-2.81	0.0363	ACACA,ADA,ADCY5,ATP2B4,CFLAR,DMD,DTNA,EIF2AK3,ERO1A,GPAM,GPLD1,HSPD1,IRAG1,ITGB1,KAT2B,LAMB1,LCP1,MYH11,NOTCH1,NTS,PIK3CA,PPARGC1A,PPP2R2B,PRKAA2,REN,TAGLN,TFRC,VCAM1,ZMYND8
8-bromo-cAMP		chemical reagent	Inhibited	-2.782	0.00506	ACTG1,AKT3,CAMP,CLSTN1,COL4A6,FUT8,GHR,IL1RL1,LAMA2,LAMP2,MAN1A2,MCM4,PMAIP1,PPARGC1A,PTGFR,RALA,RALGDS,RBL1,REN,SLC7A8,SMURF2,SPRED2,UGT1A1,VANGL2	194 (8)
forskolin		chemical toxicant	Inhibited	-2.779	0.31	ADORA2A,AKAP12,AKAP13,ARPC1A,CAMP,GK,GRIA1,HOMER1,HSPA2,PENK,PMAIP1,PPARGC1A,PRKACA,RAB4A,REN,RGS5,SLC7A8,SMARCA1,SYNJ2,TNFRSF11B,TUBA4A,XIAP
F2	1.813	peptidase	Inhibited	-2.751	0.105	CFLAR,DAAM1,DKK3,DST,HIVEP1,ITGB1,LAMP2,MYH11,PMAIP1,PROCR,VCAM1
BMP4	-0.547	growth factor	Inhibited	-2.689	0.0718	ABCF1,ABCG2,ACVR2B,ALDH1A2,DKK3,ISLR2,KAT2B,LCP1,NCAM1,PRDM14,TAGLN,TNFRSF11B,WNT9B
ARID3A	0.221	transcription regulator	Inhibited	-2.646	0.00342	CACHD1,CCAR1,DDX21,G3BP2,GPM6B,HOMER1,TMEFF1
MKNK1	0.507	kinase	Inhibited	-2.607	0.0398	ARVCF,COL4A6,HSPA2,MYO6,PDLIM5,RGS5,SMAD2,SNAP91,TAGLN
IL4		cytokine	Inhibited	-2.593	0.467	ACTG1,ADORA2A,AKAP13,ALDH1A2,BBX,CD1B,CFLAR,CHST3,CIITA,FFAR2,GPLD1,GPM6B,HIPK2,HLA-DQA2,HNRNPH3,IL1RL1,ITGAX,ITGB1,LAMP2,LMO7,MOV10,PPARGC1A,PREPL,PSTPIP1,ST7,SWAP70,TFRC,TNFRSF11B,TNIK,TREM2,TRIM14,TRIM25,VCAM1,VPS13C
methylprednisolone		chemical drug	Inhibited	-2.548	0.0248	ABI1,CBLB,CDH13,CHUK,DAB2IP,DMD,FGR,GCLC,GHR,GNL3,IL1RL1,ITGB1,KLF15,LAD1,MYO1G,PAQR7,PIK3CA,PRKACA,QDPR,SCAMP1,SLC4A11,SULT1B1,TFRC,TUBA4A,VCAM1
FEV		transcription regulator	Inhibited	-2.449	0.0235	GRIA4,ITGB1,NTS,SLC22A3,SLC7A8,VCAM1
GNA12	0.132	enzyme	Inhibited	-2.433	0.0162	DDR2,GCLC,MYH11,PIK3CA,TAGLN,VAV3
nicotine		chemical drug	Inhibited	-2.412	0.43	CFLAR,GRIA1,HOMER1,ITGAM,PENK,XIAP,XPC
IL1A	-0.357	cytokine	Inhibited	-2.409	1	ADORA2A,CAMP,ITGB1,PTX3,TNFRSF11B,VCAM1
ATF4	-0.389	transcription regulator	Inhibited	-2.388	0.0202	ABCG2,DDR2,ERO1A,FAM3C,GPATCH1,IRAK1BP1,PENK,PMAIP1,PPP1R15A,PTX3,TNFRSF11B
Z-LLL-CHO		chemical - protease inhibitor	Inhibited	-2.383	3.56e-05	ABCG2,AR,CDH13,CFB,CFLAR,CHD1,CHUK,CSNK1A1,DDR2,DMD,DROSHA,EIF2AK3,EIF4E,GHR,HSPD1,HTT,ITGB1,PMAIP1,PRKAA2,PTGFR,SMAD2,STXBP5,VCAM1,XIAP,XPC	191 (12)
SRF	0.367	transcription regulator	Inhibited	-2.286	0.0107	ACTG1,AKAP12,ANKRD6,CAMP,CLDN1,DMD,EYA3,GLRX3,ITGAM,ITGB1,MCF2L,MYH11,PDCD10,PDE2A,RAB27B,TAGLN,TMEM44,TUBB4B
nitrofurantoin		chemical drug	Inhibited	-2.236	0.414	ACTG1,EIF4E,ITGB1,SELENBP1,VCAM1
SHH		peptidase	Inhibited	-2.219	1	ABCG2,DAAM1,EIF2AK3,MAGI1,MEF2C
SMARCB1	0.417	transcription regulator	Inhibited	-2.219	1	AMPH,DOCK4,EIF4E,MCM4,PRKAB2
MAP2K1	-0.058	kinase	Inhibited	-2.213	1	CFLAR,ITGB1,RRAGD,SMAD2,TREM2
FOXO1	-0.697	transcription regulator	Inhibited	-2.212	0.00565	ACACA,AGXT,AR,BANK1,CFLAR,ELOVL7,ERG,FOLR1,GPAM,GPR17,HSPD1,ITGAM,LAMP2,PMAIP1,PPARGC1A,PPP1R15A,PRKAA2,RHOT1,RPS6KA3,UBASH3B,VCAM1	41 (3)
ADORA2A	-5.095	G-protein coupled receptor	Inhibited	-2.2	0.279	G3BP2,GPLD1,KIF5B,PENK,PPARGC1A
TCR (complex)		complex	Inhibited	-2.189	1	ADORA2A,AKT3,CBLB,CFLAR,EIF4E,HSPD1,IL1RL1,PIK3R3,PMAIP1
ARNT	-0.697	transcription regulator	Inhibited	-2.186	0.134	BLK,CLDN1,DPF3,ERO1A,RGS5,TFRC,TUBA4A
ETS1	-1.46	transcription regulator	Inhibited	-2.183	0.406	CHUK,ITGAM,LAIR1,LAMB1,REN,SCAMP1,ZEB2
epinephrine		chemical - endogenous mammalian	Inhibited	-2.173	0.0654	IL27,PENK,PPARGC1A,TFRC,UGT1A1
GHRL		growth factor	Inhibited	-2.154	0.0463	ACACA,GPAM,MLYCD,PPARGC1A,PRKAA2
acetaminophen		chemical drug	Inhibited	-2.138	0.294	ABCG2,ACTG1,BCKDHA,GCLC,GHR,HSPD1,ITGB1,UGT1A1,VCAM1
EGF		growth factor	Inhibited	-2.113	0.00458	ABCG2,ABI1,ADA,AR,CFLAR,DOCK4,EIF2AK3,HIRA,IL1RL1,ITGAM,ITGB1,KCNQ3,LAMB1,LIMK2,MAP3K20,MST1,NCAM1,NOTCH1,NPR2,NR5A2,PDE3A,PTPN12,PTX3,RALA,REN,RPS6KA1,TAGLN,TM4SF5,TNFRSF11B,VCAM1,XIAP	217 (10)
IKBKB	0.209	kinase	Inhibited	-2.081	0.272	AR,CBLB,CDH13,CFLAR,CLDN1,PTX3,TNFRSF11B,UACA,VCAM1,XIAP
Ca2+		chemical - endogenous mammalian	Inhibited	-2.039	0.262	ABHD5,ADORA2A,AR,HOMER1,IL1RL1,PPARGC1A,TAGLN,TCHH,TNFRSF11B,VCAM1
CD40LG		cytokine	Inhibited	-2.019	0.0163	AKAP13,CFLAR,CIITA,HLA-DQA2,IL27,ITGAM,KIF2A,PALM2AKAP2,PMAIP1,PREPL,PTPN12,RGS1,SWAP70,TFRC,TNFRSF11B,TREM2,VCAM1,XIAP
pirinixic acid		chemical toxicant	Inhibited	-2.005	0.27	ABCG2,ACACA,CCNT1,GPAM,HOXA7,HSPD1,ITGAM,KPNA1,MLYCD,PIK3R3,PPARGC1A,RTN4,SLC22A5,VCAM1
PPARG	1.755	ligand-dependent nuclear receptor	Inhibited	-2.005	0.285	ABCG2,ACACA,AKT3,ALDH1A2,ERO1A,FOXO6,GPAM,MLYCD,PHKB,PPARGC1A,PPP2R2B,REN,RORC,STXBP5,TAGLN,VCAM1
tributyrin		chemical drug	Inhibited	-2	0.0833	AKAP12,CLDN1,MME,PDLIM5
LIN28B		other	Inhibited	-2	0.0908	ACACA,COL11A2,SMAD2,ZEB2
SN-011		chemical reagent	Inhibited	-2	0.103	MOV10,TRIM14,TRIM25,UBA7
PDK1	-0.861	kinase	Inhibited	-2	0.111	GALC,OSBPL8,PIK3R3,SMURF2
HMG20A	0.006	transcription regulator	Inhibited	-2	0.323	ACTG1,TAGLN,TNFRSF11B,VCAM1
haloperidol		chemical drug		-1.991	0.0764	ADORA2A,GRIA1,HOMER1,NTS,PENK
ATF2	-1.258	transcription regulator		-1.99	0.0119	BCKDHA,IL1RL1,NOTCH1,NTS,PENK,PPARGC1A,VCAM1
GW7647		chemical drug		-1.982	0.00455	ABCG2,MLYCD,PPARGC1A,SLC22A5
ROCK (family)		group		-1.982	0.0481	DMD,PPP1R12A,TAGLN,VCAM1
HSPA5	-0.847	enzyme		-1.982	0.137	ACACA,CRTC1,EIF2AK3,GRIA1,PPP1R15A
captopril		chemical drug		-1.982	0.151	LTBP2,MYO6,REN,THBS4
IL12 (family)		group		-1.982	1	CFLAR,KAT2B,RORC,TFRC
MED1	-1.287	transcription regulator		-1.98	0.00716	ACACA,ADCY5,ANAPC5,CCNJ,FGD2,GHR,GPAM,LAD1,MEF2C,PRDM14,PRR5L,TET1,ZMYND11
FGFR2	-2.345	kinase		-1.98	0.191	ITGB1,LAMB1,MAP3K20,NOTCH1,NR5A2,VCAM1
rosiglitazone		chemical drug		-1.979	0.535	ADA,CIITA,FAM3A,GK,GPAM,GRIA1,ITGAM,MAN1A2,MLYCD,NDUFV1,PENK,PPARGC1A,REN
TGFB2	-0.938	growth factor		-1.975	0.000284	ABCG2,AGXT,CFLAR,CIITA,DEPTOR,DOCK4,F2,NOTCH1,SMAD2,TAGLN,THBS4,TMEFF1,TNFRSF11B,TUBB4B,XIAP	248 (11)
N-Ac-Leu-Leu-norleucinal		chemical - protease inhibitor		-1.969	0.151	EIF4E,LAMP2,RBL1,XIAP
FSH (complex)		complex		-1.964	0.00622	AKAP12,AR,ARPC1A,BTC,CFLAR,CHUK,CSNK1A1,GCLC,GDE1,GK,GNB1,KIF5B,PENK,PMAIP1,RAB4A,RGS5,SMAD2,TFRC,TNFRSF11B,XIAP	203 (12)
CAV1	-1.011	transmembrane receptor		-1.963	0.215	FOLR1,LRP6,NOTCH1,RALA,SLC14A1,VCAM1
STAT6	0.549	transcription regulator		-1.961	0.462	AKAP13,GPM6B,HIPK2,HNRNPH3,IL1RL1,LMO7,MOV10,MYO6,PPARGC1A,PSTPIP1,SELENBP1,TNIK,VCAM1
aldosterone		chemical - endogenous mammalian		-1.961	1	PPARGC1A,PROCR,VCAM1,ZMYND8
epoxomicin		chemical - protease inhibitor		-1.96	0.00754	CFLAR,DMD,HTT,RHOT1
PPARGC1B	2.147	transcription regulator		-1.951	0.115	ACACA,ERO1A,GPAM,MCM4
CCNC	-0.576	enzyme		-1.948	0.00455	ACACA,NOTCH1,PPARGC1A,VCAM1
TGFB3	0.457	growth factor		-1.941	0.0324	LTBP2,PPARGC1A,SMAD2,TAGLN,TNFRSF11B,XIAP,ZEB2
TLR4	0.165	transmembrane receptor		-1.92	0.014	ACACA,ADORA2A,BBX,CFB,CFLAR,IL27,ITGAM,NOD2,NSMAF,PTGFR,PTX3,RBL1,RGS1,TFRC,TREM2,UGT1A1,USP25,VCAM1,XIAP
carbon tetrachloride		chemical toxicant		-1.92	0.117	BCKDHA,DCLK1,GCLC,HSPD1,ITGB1,PPP1R15A,QDPR,SMAD2,SMURF2,VCAM1
MRTFA	1.249	transcription regulator		-1.913	0.0655	ACTG1,CAMP,CDC42BPA,ITGB1,MYH11,RAB27B,RHOBTB1,RPS6KA3,TAGLN,VCAM1
MYOCD	-2.746	transcription regulator		-1.908	0.217	EIF2AK3,MEF2C,MYH11,TAGLN
NKX2-3		transcription regulator		-1.906	0.331	DCLK1,GHR,MYH11,PMAIP1,UACA,UBA7,VCAM1
GRIN2A		ion channel		-1.89	0.00852	ADORA2A,CASC3,GRIA1,GRIN2D,HOMER1,PEAK1,PLXNB1
EBF1	-0.587	transcription regulator		-1.89	0.0311	AKT3,CBLB,CHUK,NOTCH1,PIK3CA,PIK3R3,PPARGC1A,PRKAA2,PRKACA
mono-(2-ethylhexyl)phthalate		chemical toxicant		-1.89	0.14	AR,HIPK2,KIF5B,MLYCD,NDUFV1,PPARGC1A,TIMD4
medroxyprogesterone acetate		chemical drug		-1.852	0.0149	ACTG1,AKT3,CLDN1,CLSTN1,COL4A6,FUT8,GHR,IL1RL1,ITGB1,LAMA2,LAMP2,MAN1A2,MCM4,PMAIP1,RALA,RALGDS,RBL1,SLC7A8,SMURF2,SPRED2,VANGL2
androgen		chemical drug		-1.833	0.304	AR,ITGAM,KAT5,SMAD2,TNFAIP8,VAV3
hydrogen peroxide		chemical - endogenous mammalian		-1.827	0.12	AR,ATOX1,BCL9,CDH13,CFLAR,ERG,GCLC,HIPK2,LRP6,MAPKAP1,MYH11,NEK1,PDCD10,PPARGC1A,PTX3,STING1,TAGLN,TFRC,TUBA4A,UACA,VCAM1
F3	-0.394	transmembrane receptor		-1.821	8.75e-05	DOCK4,EFEMP1,F2,FUT8,ITGAM,LAMB1,LCP1,PAPOLA,PROCR,TREM2,TRIM14,TRIM25,UBA7,UBASH3B,VCAM1
POU5F1		transcription regulator		-1.818	0.236	ADORA2A,BIRC6,EFEMP1,LAMP2,MEF2C,NCAM1,NCKAP1,PHC3,PMAIP1,PRDM14,TET1,TNFRSF11B,ZEB2
TAFAZZIN	0.959	enzyme		-1.811	0.0264	ALDH1A2,AMPH,BANK1,CCAR1,CEP85,LCP1,PDLIM5,PMAIP1,PTX3,SIPA1,SORBS2,TAGLN,TFRC,USP25,VCAM1
IL33	-0.586	cytokine		-1.79	0.433	ATP8B4,FGD2,FGR,IL1RL1,ITGAM,ITGAX,PPARGC1A,RGS1,RPS6KA3,SLC7A8,VCAM1,ZEB2
NOTCH3	0.763	transcription regulator		-1.778	0.00144	CCAR1,CFLAR,ITGAX,MYH11,NOTCH1,PTX3,RGS5,TAGLN
EZH2	1.37	transcription regulator		-1.751	1	CABLES1,CSNK1A1,DAAM1,DAB2IP,GATA5,HOXA7,ITGB1,KIAA1217,PLEKHA6,PPP2R2B,ZEB2
MTOR	0.256	kinase		-1.749	0.00769	ACACA,AKAP13,AR,CFLAR,DMD,FGFR3,IP6K2,ISLR2,MLYCD,NCAM1,PDK3,PLD2,PPARGC1A,RAB4A,RORC,TMCC1,TNFRSF11B,VCAM1	229 (10)
estrogen		chemical drug		-1.685	0.0432	AR,CHD1,GRIA1,GRIN2D,IL1RL1,IL27,ITGB1,MCM4,NRIP1,NTS,PENK,PTX3,TNFRSF11B
IL2		cytokine		-1.664	0.0103	CBLB,CFLAR,DAPK2,DDX21,EVL,FCMR,GNL3,GPLD1,HLA-DQA2,HSPD1,IL1RL1,IP6K2,ITGB1,KPNA1,MAP3K20,MME,PENK,PIK3R3,PMAIP1,PPP1R15A,PPP2R2B,RORC,SIPA1,SPRED2,SWAP70,TFRC,TNFAIP8,TNFRSF11B,UGP2,VCAM1,ZDHHC23
E2F1	0.858	transcription regulator		-1.63	0.0439	ABCG2,AR,CFLAR,CSDE1,DBF4,EYA3,FGFR3,FKBP3,GRAMD4,HSPD1,MCM4,NOTCH1,NRIP1,PDK3,PMAIP1,PPARGC1A,PRKAA2,PRPS2,RBL1,VCAM1,XPC
ESR2		ligand-dependent nuclear receptor		-1.595	0.0001	AKAP12,AMOTL1,AR,CDC14B,CDC42BPA,CDH13,CHUK,CLDN1,EIF4E,GCLC,GNL3,HSPA2,HSPD1,ITGB1,KIF5B,MCM4,MME,MYCL,NOTCH1,PDLIM5,PMAIP1,PPP1R12A,PTGFR,PTX3,RAB4A,RALA,RORC,RTN2,SMAD2,SUSD4,THBS4,TNFAIP8,TNFRSF11B,TNS3,TRIM14,TRIM25,VAV3,VCAM1,XIAP	228 (9)
IKZF1	-0.55	transcription regulator		-1.565	0.0404	DOCK4,EIF2AK3,IL27,JADE2,MYCL,NCAM1,NOTCH1,RORC,SHROOM3,SULF2,TET1,TNS3,UACA
MYCL	1.6	transcription regulator		-1.51	0.00155	CCNT1,CIITA,CSNK1A1,DDX3X,HSPD1,RPL18,SLC25A46,WDR75
MEK (family)		group		-1.48	0.0163	ABCG2,DDR2,DDX21,GNL3,GPM6B,HOMER1,ITGB1,LAMB1,MME,OSBPL8,PMAIP1,PPARGC1A,SLC22A5,SPRED2,TET1,TREM2
CG (complex)		complex		-1.469	0.00676	AMOTL1,AR,BTC,C2,CFB,DMD,EFEMP1,EIF4E,HDLBP,IL1RL1,ITGB1,MYCL,NR5A2,NRIP1,NTS,PMAIP1,PTGFR,PTX3,RAPH1,SMAD2,SMARCA1,SMURF2,UGP2,VCAM1,XIAP	197 (10)
KAT5	1.97	enzyme		-1.463	0.0315	CACNB2,GPAM,GRIA4,HSPD1,KAT5,PIAS2,PPP1R15A,PRR5L,RGS1,XIAP
tetrachlorodibenzodioxin		chemical toxicant		-1.461	0.0486	ABCG2,ABHD5,AR,BLK,CCL21,CDH13,DACT2,DMXL2,HSPA2,ITGAX,ITGB1,MMP15,MYH11,NOTCH1,POMP,PTGFR,SLC22A5,UGT1A1,VEZF1,ZNF148
nitroprusside		chemical drug		-1.446	0.0118	CFLAR,ITGB1,LAMB1,PPARGC1A,TNFRSF11B
PRKD1	0.88	kinase		-1.446	0.0363	CFLAR,PPARGC1A,TNFRSF11B,VCAM1,XIAP
TNFSF13B	0.946	cytokine		-1.414	0.0369	ADORA2A,C2,DAB2IP,DDR2,FFAR2,FGR,UACA,XIAP
YAP1	-0.902	transcription regulator		-1.413	0.049	ACACA,ACTG1,ALDH1A2,CEP83,CEP85,COL11A2,DTX2,ITGB1,KIF2A,PMAIP1,PTGFR,RPL18,RPS12,SMAD2,ST7,TAGLN,TFRC,UACA,UGP2,VCAM1,XIAP
EGFR	-0.879	kinase		-1.397	0.00125	ABCG2,ABI1,AR,BCKDHA,BTC,CCAR1,CSNK1A1,EFEMP1,EIF4E,GHR,GPM6B,HIRA,HOXA7,LAMB1,MME,MTHFR,NOTCH1,PDLIM5,SLC22A5,TFRC,TM4SF5,TNFRSF11B,TNNT3,TUBA4A,TUBB4B,XIAP,XRN2,ZEB2	143 (8)
PLX5622		chemical drug		-1.362	0.000644	AMPH,CLSTN1,FOLR1,GRIA1,GRIN2D,IL27,ITGAM,ITGAX,KIF5B,NCAM1,NTNG1,NTS,PRKAA2,RTN4,SNAP91,TNFRSF11B,TREM2
troglitazone		chemical drug		-1.353	0.0115	ABCG2,AR,BCKDHA,CCNJ,CEP135,CFLAR,CIITA,ERO1A,FBXW7,GPAM,HIPK2,HIPK3,MME,MYH11,NRIP1,PPARGC1A,UGT1A1,VCAM1
TLR7/8 (family)		group		-1.342	0.00367	CFLAR,FFAR2,PMAIP1,PPP1R15A,RGS1	164 (6)
ADAMTSL2	1.289	other		-1.342	0.0181	ADAMTS13,ITGAM,MMP15,NCAM1,VCAM1
Gcg		other		-1.342	0.031	AGXT,PPARGC1A,SULF2,SUSD4,TFRC
TNF	0.061	cytokine		-1.305	9.26e-07	AAK1,ABCG2,ACACA,ADCY5,ADGRB1,ADORA2A,AKAP12,AKT3,ALS2CL,AR,ATP2B4,BCKDHA,CAMP,CCL21,CD1B,CDH13,CFB,CFLAR,CIITA,CLDN1,COLQ,CTDSPL,DEPTOR,DMD,DPF3,ELOVL7,ERG,FGFR3,GCLC,GHR,GPAM,GRIA1,HIPK2,HIPK3,HIVEP1,HSPD1,IL1RL1,IL27,ITGAM,ITGAX,ITGB1,KCNJ2,LAD1,LRP6,LTBP2,MAGI1,MAN1A2,MAP3K20,MAPKAP1,MEF2C,MST1,MYH11,NCAM1,NOD2,NOTCH1,NR5A2,NRIP1,PDE2A,PDK3,PDZD2,PENK,PHACTR1,PIK3CA,PLEKHG1,PLXDC2,PMAIP1,PPAR…	294 (15)
TP53	-1.003	transcription regulator		-1.303	0.000241	ABCG2,ACBD4,ADA,ADGRB1,AKAP12,AKAP13,AKAP9,AKT3,ALDH1A2,AR,ARAP2,ARVCF,ATL3,ATOX1,C2,CDC42BPA,CFLAR,CHUK,COP1,CSK,DBF4,DDX3X,DKK3,DYNLT2,ECPAS,EIF2AK3,EIF4G3,FAM3C,FBXW7,FKBP3,GAS7,GCLC,GNL3,GOLGA4,GPM6B,GPR17,HDLBP,HSPD1,HTT,ING3,KANK3,KAT2B,KCNJ2,LAMP2,LIMK2,MCM4,MLYCD,MST1,MYO6,NAB1,NOTCH1,PACSIN1,PDE2A,PDK3,PDLIM5,PIAS2,PIK3R3,PLEKHG1,PMAIP1,PPARGC1A,PPFIBP1,PPP1R12A,PPP1R15A,PRKAB2,PTPN12,QD…	132 (5)
dexamethasone		chemical drug		-1.291	2.31e-05	ACACA,ACTG1,AKAP12,AKAP13,AKAP6,ARHGAP17,ATP13A3,ATP2B4,BCKDHA,CAMP,CBLB,CCL21,CCNJ,CEP135,CFB,CFLAR,COL11A2,CRTC3,CSNK1A1,DST,DZIP1L,EIF4E,EIF4G3,ELOVL7,EVL,FCMR,FFAR2,GCLC,GHR,GPLD1,GRAMD4,HIPK2,HOXA7,HPCAL1,IL1RL1,ITGAM,ITGB1,KHSRP,KLF15,LAD1,LAIR1,LAMA2,LAMB1,LIMK2,LPXN,LTBP2,MCM4,MEF2C,MME,NCAM1,NDUFV1,NEURL3,NOD2,NOTCH1,NPR2,NRIP1,NTS,PDE3A,PENK,PIKFYVE,PKP2,PLCB4,PMAIP1,PPARGC1A,PPP1R12B,P…	256 (12)
SOX4	-0.554	transcription regulator		-1.265	0.0428	AMOTL1,BLK,C19orf44,EVL,FFAR2,HIPK2,LMO7,MAGI1,NCAM1,SLC5A9
dimethyl n-oxalyl-glycine		chemical reagent		-1.242	0.00239	ADA,AKAP12,BBX,BCKDHA,ERO1A,FAM13A,LNPK,PDGFRL,PDK3,PRRX1,RGS5,RRAGD,SLC29A4,VCAM1	25 (2)
PRKAA (family)		group		-1.238	0.0147	AR,CLDN1,PMAIP1,PPARGC1A,XPC
IGE (complex)		complex		-1.212	0.027	EIF2AK3,FFAR2,FGD2,HSPD1,ITGAX,MCF2L,PENK,PTX3,RALGDS,RPS6KA1,RPS6KA3,RRP15,TFRC,TNFRSF11B,VCAM1
LH (complex)		complex		-1.206	0.0184	AKAP12,AR,ARPC1A,BTC,CFLAR,CHUK,CSNK1A1,GK,GNB1,OSBPL6,PMAIP1,PRKACA,PTX3,RAB4A,RGS5,TNFRSF11B
TP63		transcription regulator		-1.183	0.000432	ADA,CCNT1,CFLAR,CIITA,COL11A2,DKK3,DST,FGFR3,HIRA,ITGB1,KHSRP,LAMB1,LIMK2,NALCN,NOTCH1,PIK3CA,PIK3R3,PKP2,PMAIP1,PPARGC1A,PTPN12,RBMS3,SMAD2,SMURF2,TAGLN,TGM3,TNFAIP8,UGT1A1,VILL,XPC,ZEB2	131 (5)
GDNF	-0.294	growth factor		-1.176	0.0106	AR,GNB1,HTR2A,PENK,PRKACA,XIAP
ShK-223		chemical reagent		-1.155	1.98e-05	BLK,CLSTN1,CSK,ITGAM,LAIR1,LAMP2,PACSIN1,PLD2,RALA,STING1,TMCC3,XIAP
KRAS	-1.386	enzyme		-1.138	0.000877	AMPH,BTC,CCP110,CHST3,COL4A6,CSNK1A1,DCLK1,EFEMP1,EIF2AK3,EIF4E,ERO1A,GCLC,GPM6B,HIRA,IP6K2,ITGAM,ITGB1,KAT5,LAMA2,LAMB1,LAMP2,LMO7,LRRC49,MME,MYH11,NAB1,NCAM1,NR5A2,PDLIM5,PIK3CA,PMAIP1,POMP,PPFIBP1,PSTPIP1,PTX3,SCMH1,SLC22A5,SPRED2,TAGLN,TFRC,TNFRSF11B,TNIK,TUBA4A,XIAP,XRN2	112 (3)
NLRX1	0.885	other		-1.134	0.00274	CHUK,COL4A6,GHR,ITGAM,ITGAX,ITGB1,MAP3K20,MEF2C,NOTCH1,PIK3CA,PPP2R3A,RBL1,SMAD2,VAV3,ZEB2
clozapine		chemical drug		-1.131	0.0193	ACACA,GRIA1,HOMER1,NTS,PPARGC1A
SB 216763		chemical drug		-1.131	0.0429	ACACA,MYH11,RGS1,TAGLN
NR1H (family)		group		-1.129	0.0199	ACACA,ALDH1A2,C2,ELOVL7,GPAM,NR5A2,PPARGC1A,REN,SBNO2
IL10RA	0.777	transmembrane receptor		-1.107	0.00299	ACSM3,AKT3,CACHD1,CFB,EFEMP1,ERO1A,GHR,HMCN1,ITGAM,NR5A2,PDE2A,PPARGC1A,PROCR,SELENBP1,SORBS2,TGM3,THBS4
NOTCH4	0.351	transcription regulator		-1.103	0.0116	MYH11,NOTCH1,RGS5,TAGLN
progesterone		chemical - endogenous mammalian		-1.08	0.012	ABCG2,ALDH1A2,AR,CFB,CTDSPL,F2,FKBP3,GHR,GPAM,GRIA1,HSPA2,IL17RE,IL27,ITGB1,LAMA2,LMO7,MCM4,MME,NCAM1,PDK3,PNKD,PTBP3,PTX3,RAB27B,RTN4,SHD,SMAD2,UGT1A1
VIM	0.309	other		-1.067	0.0291	ITGB1,KCNJ2,NOTCH1,TFRC
THZ1		chemical drug		-1.066	0.0264	DKK3,LTBP2,PAMR1,PDGFRL,PDZD2,PI16,RAPH1,THBS4,TIAM2
PGR	0.155	ligand-dependent nuclear receptor		-1.063	0.0137	ABCG2,AKAP13,AKAP6,AR,CDC42BPA,CDH13,COL4A6,CTDSPL,DDX21,DST,GPM6B,HPCAL1,HSPA2,ITGAX,ITGB1,LCP1,PACSIN1,PRRX1,RAB27B,RHOBTB1,VCAM1
niacinamide		chemical - endogenous mammalian		-1.026	0.0132	CAMP,CNNM3,DROSHA,ITGAM,PMAIP1,PPARGC1A,RBL1
JUN	0.48	transcription regulator		-1.008	0.000565	AKAP12,AKT3,AR,BCL9,CAMP,CFLAR,DROSHA,GCLC,HOMER1,IL1RL1,IL27,ITGAM,ITGB1,LAMP2,MCF2L,MTHFR,NCAM1,NR5A2,NTS,PENK,PTX3,SULF2,TFRC,VAV3,VCAM1,XIAP,ZEB2	243 (9)
APOC3		transporter		-1	0.000246	CLPX,HSPD1,LONP1,VCAM1
RNASEH2B	0.944	other		-1	0.00286	ATP2C1,CFB,IL27,MOV10,PROCR,TRIM14,TRIM25,UBA7,VCAM1
ETV7		transcription regulator		-1	0.00844	CFB,PROCR,TRIM14,TRIM25
PKC (family)		group		-1	0.0272	CCAR1,CLDN1,DMD,HOXA7,ITGB1,KCNJ2,PPP1R15A,RBL1,TAGLN,VCAM1,XIAP
AURK (family)		group		-1	0.0403	GOLGA4,PDE2A,SULF2,XPC
ANLN	-1.263	other		-1	0.0403	GOLGA4,PDE2A,SULF2,XPC
bortezomib		chemical drug		-0.967	0.0442	AR,CFLAR,DMD,EIF2AK3,FCMR,GHR,HSPA14,NOTCH1,PMAIP1,PPP1R15A,VCAM1,XIAP
AZ-1		chemical - protease inhibitor		-0.946	0.0171	BCKDHA,EFEMP1,MME,NOTCH1,PDLIM5,TFRC
SMARCA4	0.137	transcription regulator		-0.945	0.0448	ATP2B4,CIITA,CLDN1,CLPX,FFAR2,FOLR1,GCLC,HOXA7,ITGB1,KCNJ2,KCNQ3,LPXN,MEF2C,MYH11,NTNG1,POMP,PTX3,RBL1,RGS1,ST7,TAGLN,TMCC3,TNFAIP8,TNNT3,TREM2
EGR2	0.586	transcription regulator		-0.915	0.00326	ABHD5,CBLB,GHR,GOLGB1,HOMER1,ITGB1,LAMA2,LMO7,MME,NOTCH1,RALGAPA1,RORC,SLC4A11,TFRC,TNIK,ZEB2
Salmonella enterica serotype abortus equi lipopolysaccharide		chemical toxicant		-0.913	0.00408	CFB,CFLAR,ELOVL7,FFAR2,HOMER1,KCNJ2,PALM2AKAP2,PMAIP1,PTX3,RGS1,SYNJ2	166 (6)
ERG	-22.429	transcription regulator		-0.905	0.025	ALMS1,AR,ARHGAP17,CLDN1,COL11A2,DAAM1,ERG,HPCAL1,LAMB1,MAGI1,MTHFR,NPHP1,PREX2,RAPH1,RHOBTB1,SGK2,SIPA1,SYT17
EPAS1	-0.432	transcription regulator		-0.863	0.00773	ABCG2,ABI1,ACACA,AKAP12,CLDN1,DMXL1,FAM13A,MLYCD,NOTCH1,PIK3CA,RAB27B,TNFRSF11B,UGP2,VCAM1	94 (3)
NUPR1	0.221	transcription regulator		-0.853	0.0141	AKAP12,BCL9,CHUK,CTPS2,DEPTOR,GK,HSPA2,IP6K2,JADE2,KAT5,MAGI1,MRTFB,OSBPL6,PM20D2,PODNL1,PPP1R15A,PRKACA,SHROOM3,TNS3,USP31,WDR76,ZSWIM6
hexamethylene bisacetamide		chemical reagent		-0.849	0.0356	DDX21,FUT8,RPL18,TFRC
dimethyl sulfoxide		chemical drug		-0.835	0.00365	FUT8,ITGAM,KAT2B,MEF2C,PDZD2,PLD2,TFRC,TNFRSF11B,UGT1A1,VCAM1
clopidogrel		chemical drug		-0.816	0.00996	KLF15,PMAIP1,PPP1R15A,PTX3,ZC3H8,ZMYND8
RGS4	-0.313	enzyme		-0.816	0.0373	NTNG1,PDE2A,PPARGC1A,SPP2,STK32B,TFRC
S100A9	-0.776	other		-0.781	0.0321	AKAP12,IL1RL1,ITGAM,KLF15,MCF2L,SOCS7,TNFAIP8,TRAF3IP1,VCAM1
MYOC	0.483	other		-0.762	0.0018	EIF2AK3,GPRASP1,HOXA7,ITGB1,KCNJ2,LAMA2,LAMB1,RAB27B
E2F (family)		group		-0.762	0.0452	CSDE1,DBF4,DROSHA,ITGB1,MCM4,RBL1,WDR76
CREB1	-1.03	transcription regulator		-0.759	0.0437	ADORA2A,AKAP13,AKT3,ATF1,ATP2B4,CDH13,CIITA,GRIA1,HOMER1,HPCAL1,HTR2A,NDUFV1,NOTCH1,PDE3A,PENK,PLXDC2,PPARGC1A,PPP1R15A,REN,SYNJ2,TFRC,ZDHHC23
3-deazaneplanocin		chemical drug		-0.753	0.0344	ADORA2A,PLXNB1,PPP1R15A,TNS3,TRIM14
IL13		cytokine		-0.707	0.0224	ADA,ADORA2A,ALDH1A2,CD1B,CD1E,DCLK1,DMXL2,EVL,FGD2,FGFR3,GAS7,IL1RL1,ITGAM,ITGAX,PPARGC1A,RORC,SWAP70,TFRC,TNFRSF11B,VCAM1
MAPT	-0.257	other		-0.7	0.000105	AAK1,ABCG2,ACTG1,AMPH,ATOX1,Cryzl2,DMXL2,EIF2AK3,ELOVL7,FGFR3,FGR,GALC,GAS7,GPM6B,HSPD1,HTT,ITGAM,ITGAX,LCP1,NCKAP1,PDE2A,PENK,PTX3,QDPR,SHROOM3,SLC14A1,SNAP91,TMCO4,TMEM92,TUBA4A,TUBB4B,UGT1A1,VCAM1	162 (8)
KCNJ2	-1.737	ion channel		-0.653	7.82e-05	AMOTL1,ATRX,CDC42BPA,CNTLN,COL11A2,GAS7,KCNJ2,PACSIN1,PHACTR1,PPP1R12A,SHROOM3,TNIK
QKI	-1.442	transcription regulator		-0.651	0.00225	GPM6B,ITGAM,ITGAX,LAMP2,NOTCH1,PPARGC1A,TAGLN,THBS4,VCAM1
PDGF (complex)		complex		-0.651	0.044	EIF4E,GRIA1,NCAM1,NOTCH1,PIK3R3,VCAM1
levodopa		chemical - endogenous mammalian		-0.625	0.0406	ABI1,ABI3,ADORA2A,CACNB2,CRTC1,DAAM1,FAM3A,GAS7,HOMER1,LAMP2,MAPKAP1,MEF2C,PDZD2,PENK,PKP2,RC3H2,REEP3,SLMAP,TIAM2,TRIM25,TTYH1,UBE3C,VANGL2,ZEB2,ZMYND8
PI3K (complex)		complex		-0.597	0.0422	CCNT1,CFLAR,GCLC,ITGAM,ITGB1,LTBP2,MEF2C,NOTCH1,PTPN12,TAGLN,TRIM25,VCAM1,XIAP
doxorubicin		chemical drug		-0.571	0.00389	ABCG2,AR,ARVCF,ATOX1,BCKDHA,BIRC6,CCAR1,CFLAR,EIF2AK3,GCLC,HIPK2,KAT2B,MEF2C,MST1,MYO6,NCAM1,PDE3A,PIK3R3,PMAIP1,PRKAA2,PROCR,RBL1,SLC22A5,SMAD2,TRIM14,TRIM25,UACA,VCAM1,XIAP	228 (12)
TGFB1	2.094	growth factor		-0.571	0.00779	ABCF1,ABCG2,ACACA,ACSM3,ADGRB1,AKT3,ATP13A3,BCL9,C2,CAMP,CFB,CHST3,CIITA,CLDN1,COL4A6,DAAM1,DDR2,DDX21,DEPTOR,DKK3,DOCK4,F2,FAM3C,FUT8,GAS7,GCLC,GDF6,GRIA1,HLA-DQA2,IL1RL1,ITGAM,ITGAX,ITGB1,JADE2,KCNQ3,KLF15,LAMP2,LIMK2,LTBP2,MCM4,MEF2C,MIA2,MMP15,MYH11,NAB1,NCAM1,NOTCH1,PDLIM5,PHACTR1,PPARGC1A,PROCR,PTX3,RBL1,RBMS3,RORC,S100A5,SBNO2,SELENBP1,SMAD2,SMURF2,TAGLN,TBC1D1,TFRC,THBS4,TLE4,TNFRSF11B,TU…	289 (12)
S100A8	-0.244	other		-0.563	0.0474	AKAP12,IL1RL1,ITGAM,KLF15,MCF2L,SOCS7,TNFAIP8,TRAF3IP1,VCAM1
AMPK (complex)		complex		-0.555	0.0436	ACACA,AR,CIITA,CLDN1,PMAIP1,PPARGC1A,VCAM1
HSF1	0.095	transcription regulator		-0.522	0.0374	ACACA,CFLAR,EFEMP1,FXR1,HSPD1,MCM4,MLYCD,MSH3,PDZD2,PPARGC1A,RAD51D,VCAM1
CXCL8		cytokine		-0.486	0.0223	ABCG2,AR,CFLAR,ITGAM,ITGAX,PLD2,VCAM1
selumetinib		chemical drug		-0.478	0.000393	CSK,DDR2,DDX21,FGFR3,FGR,PPARGC1A,TNK1,TREM2
TWIST1	0.201	transcription regulator		-0.472	0.0235	ABCG2,AR,DDR2,DKK3,FGFR3,MME,NCAM1,PAMR1,PDZD2,PPARGC1A,ZEB2
EIF4EBP1	0.094	translation regulator		-0.469	0.00411	CFLAR,CLPX,HSPD1,PPARGC1A,PRKAA2,PRKACA
FOS	-0.244	transcription regulator		-0.458	0.000199	ACACA,ACTG1,ATP2C1,BCL9,CAMP,CFLAR,DAPK2,DDX3X,FARS2,HIPK3,IL1RL1,IL27,ITGB1,KIF2A,KIF5B,LAMP2,LTBP2,MAP3K20,MYCL,NR5A2,NRIP1,NTS,PENK,PTPN12,SELENBP1,SULF2,SWAP70,TET1,TNFRSF11B,VAV3,VCAM1	73 (3)
Rbx1	0.221	other		-0.447	0.0233	CFLAR,ITGB1,PLCB4,SMAD2,TRIM25
IL4R	0.14	transmembrane receptor		-0.447	0.0389	CACNB2,HOMER1,ITGAX,MYO6,PPARGC1A,UNC13B
FOXO3	-0.286	transcription regulator		-0.442	0.00769	AR,CFLAR,CLDN1,ELOVL7,ERG,GCLC,IP6K2,ITGAM,MCM4,MEF2C,MYO6,PIK3CA,PMAIP1,PPARGC1A,PPP1R15A,PRKAA2,RTN4,VCAM1	178 (10)
lipopolysaccharide		chemical drug		-0.403	0.00367	ABCG2,ACVR2B,ADA,ADORA2A,AKAP13,ALDH1A2,AR,ARVCF,ATRX,BANK1,BBX,BCL9,CAMP,CBLB,CCAR1,CCL21,CEP85,CFB,CFLAR,CHST3,CHUK,CIITA,CLDN1,COL4A6,CSK,DDX3X,DKK3,EIF2AK3,ELOVL7,ERO1A,F2,FFAR2,FUT8,GCLC,GHR,GK,GNL3,GOLGA4,HDLBP,HIPK2,HIVEP1,HOMER1,IL27,ITGAM,ITGAX,ITGB1,KAT2B,LAD1,LAMB1,LIMK2,MEF2C,MIER2,MME,MYCL,NOD2,NOTCH1,NR5A2,NTS,PALM2AKAP2,PDK3,PENK,PMAIP1,PPARGC1A,PPP1R15A,PRKAA2,PRKACA,PROCR,PTGFR,P…	296 (12)
PIAS1	-0.642	transcription regulator		-0.343	0.0136	ACACA,CLSTN1,MYH11,SNAP91,TAGLN,UNC13B
curcumin		chemical drug		-0.331	0.0129	AR,ATOX1,CAMP,CDC14B,CFLAR,CSNK1A1,EIF4E,ITGAM,NCAM1,NOTCH1,PPARGC1A,PRPS2,TET1,TFRC,UBA7,VCAM1,XIAP,ZMYND8
CREBBP	0.156	transcription regulator		-0.309	0.0369	ADORA2A,AKAP12,AR,BANK1,EVL,FGFR3,GRIN2D,IL17RE,MCF2L,MEF2C,MST1,NOTCH1,PPARGC1A,REN,RPS6KA1,TAGLN,VCAM1
estradiol-17beta-benzoate		chemical reagent		-0.302	0.00891	ALDH1A2,ATOX1,FOLR1,HS3ST5,LAMB1,NR5A2,NTS,PITX1,PROCR,RBMS3,SMAD2,TNFRSF11B
thapsigargin		chemical toxicant		-0.293	1.02e-05	ABCG2,AR,CAMP,CDH13,CFLAR,CHUK,CSK,DCLK1,DDX3X,EIF2AK3,EIF4E,GCLC,IL1RL1,KPNA1,LONP1,LRP6,MEF2C,MTHFR,PMAIP1,PPP1R15A,PRKACA,VCAM1,XIAP	210 (11)
deferoxamine		chemical drug		-0.281	0.0304	CAMP,CFLAR,GAS7,HTT,ITGAM,PMAIP1,RGS1,SMAD2,SULF2,TFRC,VCAM1
LDB1	0.828	transcription regulator		-0.258	0.00998	BCL9,CDH13,DAB2IP,DDX3X,FGFR3,GIMAP8,GRIN2D,HOXA7,MEF2C,NCKAP1,NOD2,PDZD2,PSTPIP1,SLC5A9,SLC7A8,TRIM25
phytohemagglutinin		chemical drug		-0.258	0.0125	CACNB2,CCNT1,FGFR3,FGR,GCLC,GPLD1,HIVEP1,LAMA2,MASP1,MCM4,NCAM1,NRIP1,PAPOLA,PTPN12,ZFX
tretinoin		chemical drug		-0.247	0.00389	ABHD5,ABI1,ADA,AKAP12,ALDH1A2,AR,BTC,CCAR1,CCDC124,CLDN1,CSNK1A1,DACT2,DAPK2,DKK3,EIF4E,FFAR2,FGR,GAS7,GDE1,GHR,GNL3,GRIA1,HSPA2,HSPD1,HTT,ITGAM,ITGAX,ITGB1,KAT2B,KCNJ2,KLF15,LAMB1,LAMP2,LRP6,MEF2C,MSH3,MST1,NCAM1,NDUFV1,NOTCH1,NRIP1,PENK,PKP2,PMAIP1,PPARGC1A,PTX3,RALA,RBL1,REN,RGS5,RORC,RPS12,SCMH1,SMAD2,SMURF2,TFRC,TNFRSF11B,TPM4,TRIM24,TRIM25,UBA7,VCAM1,XPC,ZEB2,ZFX,ZNF516	266 (14)
FURIN	-0.493	peptidase		-0.243	0.00605	ITGAX,NOTCH1,PTGFR,SMAD2,XIAP	191 (6)
SIRT1	-0.876	transcription regulator		-0.23	0.0346	CFLAR,EIF2AK3,ERO1A,FCMR,FGFR3,GATA5,IL27,LAMA2,LAMB1,LTBP2,MEF2C,PHKB,PLEKHA6,PPARGC1A,Sectm1b,SMURF2,UBA7,VCAM1,XPC
TNFAIP3	0.889	enzyme		-0.218	0.0061	CFLAR,CHUK,CLDN1,TFRC,VCAM1,XIAP	164 (6)
cycloheximide		chemical reagent		-0.197	0.0268	AR,ATP2B4,CFLAR,EIF4E,ERG,GAS7,GCLC,IL1RL1,ITGAM,LONP1,MME,PMAIP1,PTX3,TNFRSF11B,UACA,VCAM1,XIAP
THZ531		chemical drug		-0.194	0.000725	AR,CCDC149,DAPK2,DDR2,DEPTOR,LMX1B,MTHFR,PLEKHA6,SORBS2,STXBP5,THBS4
AGT	0.846	growth factor		-0.18	0.011	CDH13,COL11A2,COL4A6,DCLK1,DKK3,EFEMP1,FGR,GDF6,ITGAX,ITGB1,KCNJ2,KLF15,LAMB1,LAMP2,LTBP2,MYH11,MYO6,PDE3A,PDGFRL,PI16,PKP2,PNKD,PPARGC1A,PPFIBP1,PRMT7,PTGFR,RBL1,REN,SLC10A6,SMAD2,SMURF2,TFRC,TNFRSF11B,TREM2,TTC7A,VCAM1,ZEB2,ZNF516
geldanamycin		chemical drug		-0.175	0.00701	ACACA,AR,CCDC149,CCNT1,CFLAR,CHUK,CIITA,DDX3X,HSPD1,IL1RL1,ITGB1,RALA,SLC4A1AP,SMARCA1,TNRC6A	79 (4)
PPARGC1A	-1.921	transcription regulator		-0.174	0.0212	ACACA,C2,F2,GK,GPAM,ITGB1,LAMA2,LAMB1,MCM4,MMP15,NDUFV1,NR5A2,PDGFRL,PMAIP1,PPARGC1A,PRKAA2,SMC5,TNFRSF11B,UGT1A1,VCAM1,XPC
FGFR4	-0.183	kinase		-0.152	0.0485	ACACA,CYRIB,G3BP2,NRIP1,XIAP
SOX9	-1.7	transcription regulator		-0.128	0.0105	ADGRA3,AR,GAS7,KAT2B,LRP6,MMP15,MYH11,SULF2,WWP2
epicatechin		chemical drug		-0.128	0.0389	ACACA,ACTG1,LAMB1,NOTCH1,SULF2,TM4SF5
TFRC	-2.508	transporter		-0.113	0.0279	ERO1A,GAS7,ITGAM,NDUFV1,PPP1R15A,RGS1,SMAD2,SULF2
NFATC2	-1.18	transcription regulator		-0.091	0.0235	BBX,CFLAR,IL27,ITGAM,LAMP2,PDZD2,PPARGC1A,RGS1,RORC,TLE4,USP25
EGR3	0.347	transcription regulator		-0.09	0.00325	ABHD5,CBLB,HTR2A,ITGB1,LMO7,NOTCH1,PDE3A,RORC,SLC4A11,TNIK,ZEB2
simvastatin		chemical drug		-0.08	0.0348	ADAMTS13,AR,CFLAR,CIITA,IL27,NRIP1,PHACTR1,RORC,TNFRSF11B,VCAM1,XIAP
mir-181 (includes others)		microRNA		-0.048	0.0063	AR,MME,NOTCH1,RGS5,RORC,VCAM1,ZEB2
camptothecin		chemical drug		0	1.63e-06	AKAP9,ANO9,AR,ARAP2,BIRC6,BLK,CFLAR,DNAH17,FKBP3,FUT8,GDE1,GPLD1,HSPA2,LRRC14,MEF2C,MRTFB,MYO6,PALM2AKAP2,PDZD2,PIK3CA,PLD2,PMAIP1,PSTPIP1,PTX3,RBL1,RRAGD,SIPA1,SYNJ2,TBC1D1,TFRC,TGM3,TNS3,TPM4,TUBA4A,VAV3,VCAM1,XIAP,XPC	101 (4)
CPT1B	-0.216	enzyme		0	0.000405	ACACA,AKT3,CBLB,EIF4E,GPAM,NDUFV1,PDE3A,PHKB,PHKG2,PIK3CA,PIK3R3,PPARGC1A,PRKAA2,PRKAB2,PRKACA
CAT	-0.504	enzyme		0	0.00378	CFLAR,GCLC,PMAIP1,TAGLN,VCAM1,XIAP	238 (10)
GPR174		G-protein coupled receptor		0	0.00451	ARAP2,ARHGAP17,CABLES1,CBLB,CHST3,CIITA,SWAP70,TRIM25
ammonium		chemical - endogenous mammalian		0	0.0051	ABCF1,COIL,DMD,EIF4E,ERO1A,ITGB1,KIF5B,KLF15,NCAM1,QDPR,RHOT1,ZEB2
N6AMT1	0.361	enzyme		0	0.0073	ACSM3,ALMS1,DAPK2,EVL,LCP1,NOTCH1,Sectm1b,SPICE1,TRIM37,VAV3
PAX5-ELN		fusion gene/product		0	0.0216	AMOTL1,ASB10,LPXN,RBMS3
FOXP1	-0.185	transcription regulator		0	0.0233	DMD,ITGAM,MEF2C,NR5A2
CASP4	-0.658	other		0	0.0311	FGR,ITGAM,ITGAX,LAIR1
HYAL1	0.203	enzyme		0	0.0429	ATP2B4,LPXN,TAGLN,TRIM24
2,3,4,7,8-pentachlorodibenzofuran		chemical toxicant		0	0.0429	DACT2,HSPA2,MYH11,PTGFR
ARID1A	1.186	transcription regulator		0.033	0.0229	ABCG2,ALDH1A2,ARVCF,CACNB2,COL4A6,FOLR1,GDF6,HIBCH,ITGB1,LRP6,MEF2C,MYH11,MYO6,NCAM1,PALM2AKAP2,PDLIM5,PLCB4,PTX3,SMURF2,TAGLN,TNFRSF11B
NR4A2	-0.1	ligand-dependent nuclear receptor		0.046	0.00353	ACVR2B,ALDH1A2,CFLAR,GPLD1,LMX1B,PLCH2,PRKAA2,PTX3
LMO2	0.239	transcription regulator		0.12	0.00168	BCL9,CDH13,DAB2IP,DDX3X,ERG,FGFR3,GIMAP8,HOXA7,MEF2C,NCKAP1,NOD2,NOTCH1,PDZD2,PSTPIP1,SLC5A9,SLC7A8,TRIM25
celecoxib		chemical drug		0.137	0.0421	ABCG2,AR,BIRC6,BLK,CFLAR,MAGI1,VCAM1
TYROBP	0.788	transmembrane receptor		0.152	0.00484	ITGAM,ITGAX,ITGB1,NOD2,TMEM106A,TREM2	164 (6)
HAND1		transcription regulator		0.152	0.00942	ACACA,MLYCD,NOTCH1,PITX1
NOD2	-6.016	other		0.152	0.0128	ALDH1A2,CAMP,IL27,ITGAM,RALGDS,XIAP
PROC	0.092	peptidase		0.152	0.0333	DDX21,F2,PROCR,VCAM1
F7		peptidase		0.159	0.0216	AR,CLDN1,PAPOLA,VCAM1
cisplatin		chemical drug		0.16	0.0321	ATOX1,CDC14B,CFLAR,CLSTN3,DMXL2,DNAJC27,EIF2AK3,FBXW7,GHR,GRIA1,HIPK2,ITGB1,LAMB1,LRP6,NCAM1,NHSL3,NOTCH1,NRIP1,PIK3CA,PMAIP1,PPARGC1A,PROCR,RAB27B,RABGAP1,SLC22A5,SLC30A6,SULF2,TLE4,TNFAIP8,TRAPPC13,VCAM1,XIAP,XPC
mir-34 (includes others)		microRNA		0.186	0.0243	AR,CYRIB,MAP3K20,NCKAP1,NOTCH1,NRIP1,TUBB4B
ETV6-RUNX1		fusion gene/product		0.212	0.0163	BLK,CSK,FGD2,ITGB1,KCNJ2,MME,NOTCH1,PDLIM5,PMAIP1,PPP1R15A,RPS6KA1,SIPA1,SNAP91,SORBS2,SWAP70
miR-182-5p (and other miRNAs w/seed UUGGCAA)		mature microRNA		0.277	0.0247	COL11A2,ITGB1,LRP6,NCAM1,PIK3CA
NFKBIA	0.359	transcription regulator		0.284	0.0496	CAMP,CCL21,CDH13,CFLAR,CSK,DDX3X,ERO1A,ITGB1,MMP15,NOD2,PTX3,SCMH1,SH3GLB2,TFRC,TNFAIP8,TNFRSF11B,VCAM1,XIAP
APP	-0.804	other		0.293	0.00507	ABCG2,ACTG1,AMPH,ATF1,ATOX1,ATRX,CCL21,CFLAR,CLDN1,EVL,FBXW7,FOLR1,GHR,GNB1,GPM6B,GRIA1,HIPK2,HOMER1,HSPD1,IL27,ITGAM,KIF2A,LAMP2,LONP1,LRP6,MAGI1,MEF2C,MME,PACSIN1,PENK,PMAIP1,PRKACA,QDPR,RBL1,TAGLN,TNFRSF11B,TREM2,TUBA4A,TUBB4B,VCAM1	220 (11)
tyrphostin AG 1478		chemical drug		0.298	0.0485	BTC,ITGAM,MME,PTX3,VCAM1
beta-estradiol		chemical - endogenous mammalian		0.305	5.82e-07	ABCG2,ABHD5,ACSM3,ACTG1,ACVR2B,ADA,ADORA2A,AKAP12,AKT3,ALDH1A2,AMOTL1,AR,ATRX,BTC,CCL21,CDC42BPA,CFB,CHUK,CLDN1,CLSTN1,COIL,COL4A6,DCAF6,DCLK1,EFEMP1,FGFR3,FOLR1,FUT8,GCLC,GDF6,GHR,GK,GNB1,GNL3,GPAM,GRIA1,HDLBP,HIVEP1,HOMER1,HPCAL1,HS3ST5,HSPA2,HSPD1,HTR2A,ITGB1,KCNS2,LAMA2,LAMB1,LAMP2,LMO7,MAGI1,MAN1A2,MCM4,MEF2C,MME,NCAM1,NOTCH1,NPR2,NR5A2,NRIP1,NTS,PAMR1,PAQR7,PDK3,PENK,PHACTR1,PIK3R3,PITX1,PL…	288 (12)
adavosertib		chemical drug		0.313	0.0204	BLK,CFB,EIF2AK3,ITGAM,MME,NOD2,TNFRSF11B
PD98059		chemical - kinase inhibitor		0.331	0.00325	AKAP12,AR,CAMP,CFLAR,EIF2AK3,FAM13A,GAS7,GRIA1,HPCAL1,ITGAM,ITGAX,ITGB1,KLF15,LAD1,LAMP2,MCF2L,MYH11,NAB1,PPP1R15A,PTX3,REN,RGS1,SELENBP1,TAGLN,TNFRSF11B,TUBA4A,VCAM1	202 (12)
paraquat		chemical toxicant		0.333	0.00401	CCL21,CFLAR,GCLC,ITGAM,KIAA1217,LAMP2,MRTFB,PMAIP1,TMEM42	105 (8)
tunicamycin		chemical - endogenous non-mammalian		0.344	0.0194	ABCG2,ACACA,CDH13,EIF2AK3,ERO1A,GOLGA4,HDLBP,LONP1,LRP6,MTHFR,PMAIP1,PPP1R15A,VCAM1,XIAP
FAS	-1.111	transmembrane receptor		0.372	5.89e-06	AKAP9,ARAP2,CFLAR,DNAH17,GDE1,GPLD1,HSPD1,MEF2C,MME,PALM2AKAP2,PIK3CA,PLD2,PPP1R15A,PSTPIP1,PTX3,RRAGD,SIPA1,TBC1D1,TFRC,TGM3,TNFRSF11B,TPM4,TUBA4A,VCAM1,XIAP,XPC
colistin		biologic drug		0.378	0.0213	ABI1,LAMP2,NRIP1,QDPR,SLC7A8,TREM2,ZMYND8
kanamycin A		chemical drug		0.378	0.0233	ABI1,LAMP2,NRIP1,QDPR,SLC7A8,TREM2,ZMYND8
EHMT1	0.229	enzyme		0.378	0.0288	GRAMD4,PKP2,SCMH1,SELENBP1,SLC4A11,SYBU,UNC13B
NANOG		transcription regulator		0.378	0.0353	GDF6,NRIP1,PHKG2,PRDM14,RIF1,SMAD2,SMURF2,TET1,XIAP
metronidazole		chemical drug		0.378	0.0364	ABI1,LAMP2,NRIP1,QDPR,SLC7A8,TREM2,ZMYND8
SMARCA5	-1.413	transcription regulator		0.378	0.0468	ANKRD6,ATP2B4,ATP8B4,BLK,ERG,NOTCH1,RASGRP4
DDIT3	-0.457	transcription regulator		0.381	0.00668	CFLAR,DDR2,DOCK4,ERO1A,FLYWCH1,HSPD1,ITGAM,PPARGC1A,PPP1R15A
HDAC6	-1.353	transcription regulator		0.447	0.0013	AR,GDF6,LTBP2,MST1,TAGLN,VCAM1
TAF4	-0.178	transcription regulator		0.447	0.0113	ABI1,AR,CLDN1,PENK,PPARGC1A,TGM3,VAV3
alvocidib		chemical drug		0.447	0.0168	CFLAR,ITGAM,RBL1,XIAP
gentamicin		chemical drug		0.5	0.0197	ABI1,ACSM3,DMD,GHR,GNL3,LAMP2,MYO1G,NEURL3,NRIP1,QDPR,SLC22A5,SLC7A8,TFRC,TREM2,VCAM1,ZMYND8
poly rI:rC-RNA		biologic drug		0.513	0.00451	ARHGAP17,BTC,C2,CAMP,CCNT1,CFB,CFLAR,CIITA,CSNK1A1,DDX3X,FARS2,HSPD1,IL27,ITGAM,ITGAX,MOV10,MYCL,NOD2,NOTCH1,PIK3R3,PMAIP1,PPP1R15A,RC3H2,RGS1,RNPC3,SLC25A46,STING1,TFRC,TIAM2,TNFRSF11B,TRIM14,TRIM25,UBA7,USP25,VCAM1	219 (8)
roscovitine		chemical drug		0.541	0.0118	AR,CFLAR,RALA,UGT1A1,XIAP
valproic acid		chemical drug		0.555	0.0178	ABHD5,ACACA,AR,ATP2B4,COLQ,EIF2AK3,GPAM,HOMER1,IL1RL1,MME,MTHFR,MYCL,NCAM1,NOTCH1,OSBPL8,PAQR7,POMP,PTX3,SLC7A8,UGT1A1,XIAP
PTEN	-1.148	phosphatase		0.559	0.000178	ACACA,ALDH1A2,AR,CHD1,CLDN1,COL11A2,CTDSPL,DAAM1,DKK3,FGFR3,GPM6B,GPR17,ITGB1,LAD1,LAMP2,LMX1B,MME,MMP15,MYO6,NCAM1,NR5A2,NTS,PAPOLA,PPARGC1A,PPP2R2B,PRKAA2,RAD51D,SLC4A11,SLC7A8,SMAD2,SULF2,TMEM106A,TNFRSF11B,TRAF3IP1,UBA7,VAV3,VCAM1,ZEB2	140 (6)
entinostat		chemical drug		0.585	0.0373	CFLAR,ITGAM,ITGAX,PMAIP1,RORC,XIAP
lenalidomide		chemical drug		0.593	0.0144	ACTG1,CSNK1A1,DNAJC25,DOCK4,DTNA,HIPK2,LRP6,LRRC8B,RGS1,RORC,TET1,TNS3,ZNF148
KLF15	7.622	transcription regulator		0.612	0.00507	BCKDHA,GPAM,HTR2A,KLF15,MLYCD,PPARGC1A,TAGLN,VCAM1	45 (4)
butyric acid		chemical - endogenous mammalian		0.625	0.0033	AR,ATP2B4,CAMP,CFLAR,CLDN1,FFAR2,GATA5,GCLC,IL1RL1,ITGAM,MAGI1,MYCL,PDK3,PMAIP1,PPARGC1A,PRKACA,RBL1,SELENBP1,SIPA1,THBS4,TUBA4A,XIAP,ZNF148	256 (11)
mirdametinib		chemical drug		0.639	0.000433	DEPTOR,EFEMP1,LAMA2,LAMB1,TFRC,THBS4,TREM2,VCAM1
CDK19	-0.812	kinase		0.64	0.0364	FBXW7,IP6K2,NOTCH1,PPP1R15A,PRDM14,PROCR,RPS12
DNMT3A	-1.393	enzyme		0.711	0.0241	ADCY5,AKAP12,AKAP6,ATP2B4,EFEMP1,ERO1A,GRIA4,HSPD1,MYCL,PDE2A,PLCB4,SMURF2
PRKAA2	-2.029	kinase		0.726	0.0141	DOCK4,EIF2AK3,ITGB1,PIAS2,PPARGC1A,SPRED2,TNS3,TTYH1,VCAM1
TAS4464		chemical drug		0.75	0.00942	ABCF1,CFLAR,ITGAX,PMAIP1
pimagedine		chemical drug		0.762	0.0199	CFLAR,LAMB1,SLC22A3,TAGLN
SYK	0.943	kinase		0.785	0.0288	AKAP12,FCMR,GPLD1,ITGAM,NOTCH1,PIK3CA,PLEKHG1
MIR17HG		other		0.788	0.0153	BBX,DAB2IP,LRP6,MRTFB,PITX1,RGS5,TAGLN,XIAP
triptolide		chemical drug		0.804	0.0136	AKAP12,AR,CFLAR,GCLC,GHR,PMAIP1,SMURF2,UACA,XIAP
CHD8	-0.043	enzyme		0.816	0.012	AKAP13,CSK,FOXO6,PPP1R12A,TFRC,TUBB4B
TREX1	-0.109	enzyme		0.816	0.0172	ATP2C1,BANK1,CFB,MOV10,PROCR,TRIM14,TRIM25,UBA7,VCAM1
PDLIM2	-1.486	other		0.816	0.0327	DPF3,GHR,MME,RTN2,SLC22A3,TAGLN
JQ1		chemical reagent		0.818	0.0128	ADORA2A,CFLAR,DTX2,ERG,FBXW7,LRRC49,NOTCH1,PMAIP1,PPP1R15A,RORC,XIAP
trichostatin A		chemical drug		0.845	0.0109	ABHD5,AKAP12,AR,ATF1,CAMP,CCAR1,CFLAR,CIITA,CLDN1,COL11A2,DDR2,DDX3X,DROSHA,EIF4E,FGFR3,FUT8,GCLC,GHR,ITGAM,ITGAX,LAMA2,MME,MST1,NCAM1,NOTCH1,NXF1,PDLIM5,PENK,PMAIP1,PPP1R12A,RTN4,SLC7A8,SMAD2,TAGLN,TNFRSF11B,UGT1A1,VCAM1,ZMYND8,ZSWIM6
mir-25 (includes others)		microRNA		0.849	0.0216	FBXW7,HIPK3,RGS5,WWP2
NRL		transcription regulator		0.849	0.0403	GNB1,MEF2C,PIK3CA,RTN4
cholecalciferol		chemical - endogenous mammalian		0.906	0.00347	CAMP,GAS7,ITGAM,ITGAX,MYO6,PPARGC1A,RGS1,RORC,SULF2,TNFRSF11B
HNF4A	0.455	transcription regulator		0.91	0.0113	ADGRB1,AGTPBP1,AKAP13,ATOX1,BCKDHA,C19orf44,C2,CCNT1,CCP110,CEP83,CEP85,CLDN1,CLPX,CSK,DAAM1,DNAJC28,DPF3,ELP5,ERO1A,FKBP3,FUT8,G3BP2,GNL3,GOLGA4,GPLD1,GRIN2D,ING3,KLF15,LAD1,MOV10,MST1,NBAS,NDUFV1,NOD2,NR5A2,NRDC,PAPOLA,PDCD10,PHKB,PIK3R3,PKP2,PLD2,PPARGC1A,PPFIBP1,PPP1R12B,PRKAB2,PRMT7,PTGFR,PTPN12,RBL1,RBM28,RORC,RPL18,RPS6KA1,RPS6KC1,SBNO2,SEPSECS,SGK2,SLC22A3,SUPT3H,SYBU,TBC1D15,TDRD3,TEX10,…
RIGI	-1.2	enzyme		0.912	0.0345	BLK,CFB,ITGAM,MME,NOD2,TNFRSF11B,TRIM25,UBA7
miR-34a-5p (and other miRNAs w/seed GGCAGUG)		mature microRNA		0.915	0.0073	CACHD1,CD1E,EFEMP1,FCMR,KAT2B,LRP6,NOTCH1,PREX2,SUPT3H,TAGLN
HTT	-23.899	transcription regulator		0.943	2.62e-06	ACACA,ADCY5,ADORA2A,AKAP12,ATP2C1,CHUK,CLDN1,DKK3,ELOVL7,EVL,FBXW7,FOLR1,GAS7,GCLC,GPLD1,GRIA1,GRIN2D,HOMER1,HPCAL1,HSPD1,HTT,ITGB1,KCNJ2,LTBP2,NTS,OSBPL8,PDE2A,PDK3,PENK,PIK3CA,PLCB4,PNPLA7,PPARGC1A,PRKAA2,PRKACA,QDPR,SLMAP,SYNJ2,TAGLN,TFRC,TNNT3,TUBA4A,UGP2,VCAM1,XIAP	173 (8)
PRMT1	0.295	enzyme		0.946	0.0468	AR,CFLAR,CLDN1,GCLC,PPARGC1A,SMURF2,ZEB2
ELOVL5	-1.111	enzyme		0.958	0.00942	ABHD5,ACACA,GPAM,PPARGC1A	42 (4)
OLIG2		transcription regulator		1	0.000878	GPR17,LRP6,NOTCH1,WNT9B,ZEB2
deferasirox		chemical drug		1	0.0154	GAS7,ITGAM,RGS1,SULF2
ibrutinib		chemical drug		1	0.0165	EIF4E,GNL3,HSPD1,ITGB1,MCM4,NDUFV1,NRIP1,UGGT2,XIAP
RGS1	1.527	enzyme		1	0.0216	CSDE1,EIF4E,ITGB1,RBL1
pinometostat		chemical drug		1	0.0251	BBX,CIITA,MEF2C,NOTCH1
ARID2	-1.318	transcription regulator		1	0.0429	BLK,MEF2C,NTNG1,SMAD2
TLR3	-0.841	transmembrane receptor		1.019	0.0484	AKT3,CFB,CFLAR,GLRX3,IL27,NOTCH1,NTS,PIK3R3,PMAIP1,PROCR,PTX3,RGS1
IFNG		cytokine		1.028	0.0342	ABI1,ADCY5,ADORA2A,ALDH1A2,ANAPC5,ARAP2,C2,CDH13,CEP85,CFB,CFLAR,CHST3,CIITA,CSK,DDR2,DNAJB7,EIF2AK3,GRIA1,HIRA,HSPD1,IL1RL1,IL27,ITGAM,ITGAX,ITGB1,MCM4,MYO6,NCAM1,NEURL3,NOD2,NOTCH1,NR5A2,PENK,PHACTR1,PMAIP1,POMP,PPARGC1A,PTX3,RGS1,RORC,RRAGD,SBNO2,Sectm1b,SLC14A1,STING1,TFRC,TMCC3,TNFRSF11B,TREM2,VCAM1,ZEB2,ZFX,ZKSCAN1
hydroxypropyl-beta-cyclodextrin		chemical drug		1.043	0.00054	C2,CSNK1A1,DMXL2,HDLBP,ITGAX,KIF5B,TREM2,UBA3,UGP2,VCAM1
TREM1	0.714	transmembrane receptor		1.043	0.0051	CFB,EIF2AK3,ELOVL7,FFAR2,HOMER1,IL1RL1,ITGAX,KCNJ2,NOD2,PALM2AKAP2,RGS1,SYNJ2	167 (6)
GPER1		G-protein coupled receptor		1.06	0.0128	BTC,ITGAM,MYH11,NOTCH1,PPP1R15A,TAGLN
PRKAA1	-2.212	kinase		1.066	0.0203	DOCK4,GHR,MLYCD,PIAS2,PPARGC1A,PRKAA2,SPRED2,TNS3,TTYH1,VCAM1
EIF2AK3	22.059	kinase		1.095	0.0421	AFG2A,EIF2AK3,ERO1A,GOLGA4,LONP1,MTHFR,PPP1R15A,XIAP
USF1	0.346	transcription regulator		1.103	0.0313	AKAP12,CIITA,GATA5,GPAM,REN,RORC
DDX25		enzyme		1.117	0.0288	DNAJB7,DROSHA,EIF4E,FHL5,PPP2R2B,SOCS7,TUBA4A
KDM1A	-0.262	enzyme		1.13	0.000141	ADCY5,CIITA,Cryzl2,DDR2,ELOVL7,FGR,GATA5,ITGAX,LCP1,MCM4,PDE2A,PDE3A,PPP1R12A,PTX3,RBL1,SHROOM3,SLC22A3,SMURF2,SYBU,TMCC3,TMCO4,TRIM37,VCAM1	54 (3)
ACTIVIN (family)		group		1.134	0.0472	DKK3,ISLR2,ITGB1,KAT2B,MYCL,NOTCH1,PI16,PODNL1,RORC,TBC1D1,WNT9B
N-acetyl-L-cysteine		chemical drug		1.166	0.0176	AR,CFLAR,EIF2AK3,GCLC,GNL3,ITGAM,ITGB1,MYH11,NOTCH1,PPARGC1A,TAGLN,VCAM1,XIAP
mir-8 (includes others)		microRNA		1.191	0.00922	ABCG2,CACNB2,CLDN1,ITGB1,MCM4,NOTCH1,PMAIP1,SCMH1,SMAD2,SULF2,XIAP,ZEB2	111 (4)
sirolimus		chemical drug		1.205	0.0093	ACACA,ADA,AR,ATP2B4,BCKDHA,BCORL1,CFB,CFLAR,GALC,GCLC,GRIA1,HSPD1,HTT,IL27,LAMB1,MYH11,NCAM1,NOTCH1,NTS,PPARGC1A,PTX3,RORC,RPL18,RPS12,SLC30A6,TNFRSF11B,TRIM25,VCAM1	225 (10)
RUNX1	-1.51	transcription regulator		1.234	0.0404	BANK1,BLK,COP1,DEPTOR,GNL3,GPAM,ITGB1,KRT80,NCAM1,PMAIP1,PPP1R15A,RORC,RRP15
berberine		chemical drug		1.254	0.0077	ACACA,CCNT1,CFLAR,CLDN1,PIK3R3,RORC,SMAD2,VCAM1,XIAP	198 (7)
LAMA4	-0.483	enzyme		1.316	0.00552	COL4A6,FXR1,G3BP2,GHR,ITGB1,LAMA2,LAMB1,NOTCH1,PPARGC1A,SEPTIN10,SIPA1
STEAP3	0.128	transporter		1.342	0.0147	ADORA2A,ERO1A,KLF15,SORBS2,TFRC
TRAF2	0.377	enzyme		1.342	0.0212	CFLAR,FFAR2,IL27,ITGB1,PPARGC1A,REEP3
miR-27a-3p (and other miRNAs w/seed UCACAGU)		mature microRNA		1.387	0.0233	FBXW7,MEF2C,NOTCH1,PMAIP1,VAV3
RPL13A	-1.44	other		1.414	0.0197	CIITA,ELP5,FKBP3,PEAK1,RIF1,RPS6KA3,SPRED2,TIAM2
PSEN2	0.505	peptidase		1.455	0.0496	FBXW7,GNB1,KIF5B,NOTCH1,PSTPIP1,XIAP
budesonide		chemical drug		1.546	0.00776	ACTG1,BLK,DOCK3,EPB41L4A,HIPK3,ITGAM,KAT2B,LIMK2,MYO6,PLEKHA6,PRKACA,PSD3,RALA,RGS5,SECISBP2L,UACA
GABA		chemical - endogenous mammalian		1.606	0.015	ANAPC5,ATP2B4,CACNB2,DAAM1,FUT8,GALC,GNB1,GNL3,HIBCH,NOTCH1,PIK3R3,RALA,RHOBTB1,RPL18,SMAD2,UBE2Q2,UGGT2,YOD1,ZNF274
MYCN	0.175	transcription regulator		1.649	0.0431	ABCF1,ABCG2,ACTG1,CCNT1,CIITA,DKK3,HSPD1,ITGB1,NCAM1,PMAIP1,RGS5,RPL18,RPS12,TAGLN,ZEB2
miR-124-3p (and other miRNAs w/seed AAGGCAC)		mature microRNA		1.661	0.0449	ABHD5,ATL3,CDC14B,ITGB1,KLF15,NECAP2,OSBPL8,PTPN12,SLC22A5,SWAP70,TTC7A
SP2509		chemical reagent		1.664	0.0294	AR,ATF1,CCAR1,CFLAR,DDR2,DDX3X,EIF4E,NCAM1,NOTCH1,PDLIM5,RTN4,SMAD2,ZMYND8,ZSWIM6
imatinib		chemical drug		1.687	0.0179	ATP2C1,BIRC6,CFLAR,CHD1,DBF4,EIF2AK3,HSPA2,IP6K2,ITGAM,ITGAX,KAT5,MME,RAB4A,RTN4,TFRC,XIAP
PTGS2	-0.919	enzyme		1.762	1	ADCY5,CIITA,GRIA1,TET1,TFRC,TREM2
LY294002		chemical drug		1.802	0.0417	ABCG2,ACACA,ACSM3,AR,CFLAR,CSNK1A1,GCLC,GK,ITGAM,LAMB1,MEF2C,MYH11,NTS,PMAIP1,PTX3,RBL1,REN,RGS1,RORC,TAGLN,VCAM1,XIAP
RAF1	-0.364	kinase		1.808	0.0249	AKAP12,CLDN1,FAM13A,HPCAL1,ITGAM,ITGB1,LAD1,MCF2L,RGS1,SELENBP1,TUBA4A
U0126		chemical drug		1.851	0.0873	ABCG2,ACACA,CAMP,CFLAR,CIITA,EIF2AK3,ERG,FOLR1,GCLC,GRIA1,ITGB1,LAMB1,LAMP2,PPP2R3A,PTPN12,REN,RORC,RPS6KA1,TNFRSF11B,TUBA4A,VCAM1
zeaxanthin dipalmitate		chemical - endogenous non-mammalian		1.897	0.00403	ACVR2B,AGTPBP1,AKAP12,LAD1,PPP2R2B,PTGFR,SBNO2,SLC14A1,SMURF2,THBS4
nocodazole		chemical reagent		1.897	0.0327	CFLAR,CHUK,CSK,NOTCH1,PTPN12,RPS6KA1
miR-92a-3p (and other miRNAs w/seed AUUGCAC)		mature microRNA		1.919	0.0251	FBXW7,HIPK3,OSBPL8,ZEB2
mir-7 (includes others)		microRNA		1.928	0.0216	EIF4E,MAPKAP1,PIK3R3,SMAD2
IRF2	1.724	transcription regulator		1.929	0.274	CFB,CIITA,DST,IL27,VCAM1
PITX2	0.039	transcription regulator		1.941	0.0935	CCL21,Cryzl2,DACT2,ITGB1,LMX1B,PITX1,ZEB2
KU-55933		chemical drug		1.96	0.00521	ACTG1,CFLAR,TAGLN,VCAM1
pyrrolidine dithiocarbamate		chemical reagent		1.96	0.404	GCLC,UGT1A1,VCAM1,XIAP
Hbb-b1		transporter		1.964	0.0883	CIITA,ITGAM,NDUFV1,TFRC,VCAM1
PSEN1	0.851	peptidase		1.97	0.00967	ABCG2,ACTG1,AMPH,ATOX1,FBXW7,GNB1,GPM6B,HOMER1,HSPD1,KIF5B,MME,NCAM1,NOTCH1,PMAIP1,PSTPIP1,QDPR,TUBA4A,TUBB4B,XIAP	202 (10)
miR-21-5p (and other miRNAs w/seed AGCUUAU)		mature microRNA		1.98	0.161	FAM3C,HIPK3,TAGLN,TNFRSF11B
CNTF		cytokine		1.982	1	ERG,NOTCH1,PENK,VAV3
ID1	-0.936	transcription regulator		1.987	0.156	FGFR3,NOTCH1,PPARGC1A,ZNF148
Srgn		other	Activated	2	0.0356	FCMR,ITGAM,ITGAX,NEURL3
CLEC4A	-0.282	other	Activated	2	0.0661	ITGAM,NOTCH1,TIMD4,TREM2
Go 6976		chemical drug	Activated	2	0.0908	ITGB1,LAMP2,VCAM1,XIAP
pyridostatin		chemical reagent	Activated	2	0.0985	MOV10,TRIM14,TRIM25,UBA7
pidnarulex		chemical drug	Activated	2	0.186	CLSTN3,STING1,SYT17,XPC
DUSP1	0.63	phosphatase	Activated	2	1	CAMP,CFB,PAQR7,VCAM1
mir-802		microRNA	Activated	2.121	0.0357	AKT3,ITGB1,LRP6,MYH11,PIK3R3,RALA,SCAMP1,VAV3
TSC2	0.63	other	Activated	2.121	0.0693	ACACA,ERO1A,GALC,PIAS2,SLC14A1,SNAP91,SPRED2,TAGLN
JNK (family)		group	Activated	2.156	1	ALDH1A2,CFLAR,GRIA1,VCAM1,XIAP
NR3C1	1.287	ligand-dependent nuclear receptor	Activated	2.183	0.165	ABHD5,ABI1,ACACA,BCKDHA,CCAR1,DAPK2,GRIA1,GRIA4,HTR2A,ING3,KAT5,KLF15,LAD1,MAP3K20,NDUFV1,NOD2,NRG2,NSMAF,PIK3R3,PPP1R15A,RBMS3,RTN4,TNFAIP8,TNFRSF11B,TUBA4A,UNC13B,VCAM1
mir-10 (includes others)		microRNA	Activated	2.2	0.0885	AR,CTDSPL,FGFR3,RPS6KA1,SMAD2,TBC1D1
miR-16-5p (and other miRNAs w/seed AGCAGCA)		mature microRNA	Activated	2.2	0.199	CDC14B,EIF4E,F2,GPAM,PHKB,RHOT1,RTN4,UGP2
HDAC1	-2.677	enzyme	Activated	2.219	0.0859	AKAP12,AR,CLDN1,DAB2IP,MEF2C,MME,PMAIP1,PPARGC1A,PPP2R2B,RBL1,RORC,TAGLN
T-5224		chemical reagent	Activated	2.236	0.191	AMOTL1,PTX3,RAPH1,SMARCA1,UGP2
CST5		other	Activated	2.35	0.00511	AKAP12,DDX21,GAR1,GNL3,MEF2C,PDLIM5,PMAIP1,RBM28,RNPC3,RRP15,SLC4A1AP,SMAD2,WDR36,ZCCHC8,ZFC3H1
SB203580		chemical drug	Activated	2.365	0.0969	AR,CAMP,CIITA,CLDN1,EFEMP1,ELOVL7,GK,ITGAM,MYH11,PENK,PPARGC1A,PPP1R15A,TAGLN,TCHH,TMCC1,TNFRSF11B,VCAM1,XIAP
IRF8	0.528	transcription regulator	Activated	2.377	0.0685	AKAP12,BANK1,CFB,CIITA,IL27,ITGAM,SOCS7,TREM2,ZEB2
arsenic trioxide		chemical drug	Activated	2.379	0.0366	ATP2C1,CFLAR,DBF4,EIF2AK3,GCLC,HSPA2,IP6K2,ITGAM,ITGB1,KAT5,NOTCH1,RAB4A,RTN4,TFRC,XIAP
Y 27632		chemical drug	Activated	2.411	0.0299	ACTG1,ADA,HTT,MYH11,TAGLN,VCAM1
miR-145-5p (and other miRNAs w/seed UCCAGUU)		mature microRNA	Activated	2.443	0.0212	CLINT1,EIF4E,LAMP2,MYH11,SWAP70,TAGLN
uranyl nitrate		chemical toxicant	Activated	2.646	0.0223	EPB41L4A,FKBP3,GHR,GLRX3,HSPD1,LAMP2,TAGLN
memantine		chemical drug	Activated	2.646	0.0288	ABI1,AMPH,ATP2B4,CDC42BPA,HOMER1,HTR2A,RTN4
HNRNPA2B1	-1.231	other			3.05e-05	AKT3,ATRX,CACNB2,CLDN1,DCLK1,ELOVL7,HIPK2,NTS,PIK3CA,PLCB4,PPARGC1A,STK32B,TNS3,UBASH3B
PTIO		chemical reagent			0.000157	ITGAM,ITGB1,NCAM1
RBM20	0.669	other			0.000158	CSDE1,EIF4E,HSPD1,ITGB1,KPNA1,PKP2,RPS12,TDRD3,TNRC6A,TUBA4A,XRN2
HISTONE H3 (family)		group			0.000549	ADCY5,ADGRB1,AKAP12,CFLAR,CIITA,COL4A6,DAB2IP,DBF4,GHR,HOMER1,HOXA7,ING5,KAT5,KLHDC10,MCM4,MEF2C,NDUFV1,NR5A2,PMAIP1,PPARGC1A,PPP2R2B,RAB27B,RBL1,TAGLN,TET1,VCAM1,ZEB2	36 (2)
phenyl butyrate		chemical reagent			0.000645	ATP2B4,CAMP
GADD45GIP1	2.028	other			0.000831	GCLC,HSPD1,LONP1
NMDA RECEPTOR (complex)		complex			0.000951	GRIA1,HOMER1,NCAM1,PENK	92 (6)
NUP98-HOXA9		fusion gene/product			0.00102	NEK1,SIGLEC11,SORBS2,TLE4,VANGL2
11-dehydrocorticosterone		chemical - endogenous mammalian			0.00122	ACACA,GPAM,PPARGC1A
HOXB9	-1.186	transcription regulator			0.00145	NCAM1,NRG2,REN,SMURF2
mir-634		microRNA			0.00171	AR,LAMP2,XIAP
miR-292b-5p (and other miRNAs w/seed CUCAAAA)		mature microRNA			0.00171	AR,CSDE1,SMAD2
CYCLIN B (family)		group			0.0019	CFLAR,XIAP
NUF2	-0.684	other			0.0019	PIK3CA,TFRC
anastrozole		chemical drug			0.0019	TNFRSF11B,VCAM1
idronoxil		chemical drug			0.0019	CFLAR,XIAP
LMNA	0.079	other			0.00192	CCP110,CTDSPL,FBXW7,GCLC,HIVEP1,KANK3,KLF15,MAPKAP1,MEF2C,MMP15,NPR2,PHF1,PLD2,PLXDC2,PPARGC1A,TAGLN,THUMPD3,UBA7
HNRNPC	-0.234	other			0.00231	CSDE1,DDR2,XIAP
SOD1	0.491	enzyme			0.00249	ATF1,CCNT1,CFLAR,GCLC,GNB1,GRIA1,GRIA4,HOMER1,HPCAL1,ITGAM,ITGAX,KCNJ2,PLCB4,PPP1R15A,PRKACA,PRRX1,TFRC,VCAM1	179 (7)
sofalcone		chemical drug			0.00374	GCLC,VCAM1
8-(3-chlorostyryl)caffeine		chemical reagent			0.00374	ADORA2A,NTS
OLFM2	-0.062	other			0.00374	MYH11,TAGLN
ABRA		other			0.00374	PPARGC1A,TAGLN
LPXN	1.7	transcription regulator			0.00374	MYH11,TAGLN
LAMB1	-3.541	other			0.00374	ITGB1,NOTCH1
TNFRSF10D		transmembrane receptor			0.00374	CFLAR,XIAP
Yap1		other			0.00374	MYH11,TAGLN	8 (2)
SRD5A1	0.248	enzyme			0.00396	ACACA,AR,CLDN1,PRKAA2
CLDN6		other			0.00521	CLDN1,MOV10,PLEKHA6,TGM3
HISTONE H4 (family)		group			0.00535	ADA,AKAP12,CFLAR,CIITA,MCM4,MEF2C,PMAIP1,RBL1,TAGLN,VCAM1
mir-373		microRNA			0.00591	CSDC2,LAMP2,PIK3CA
HOXA4	0.265	transcription regulator			0.00591	ITGB1,MYH11,TAGLN
evodiamine		chemical - endogenous non-mammalian			0.00592	CFLAR,EIF2AK3,PMAIP1,XIAP
C5-B6		complex			0.00613	CFLAR,VCAM1
TXLNG	-0.514	other			0.00613	PPARGC1A,PRKAA2
CARMN		other			0.00613	MYH11,TAGLN
RSF1	-1.018	transcription regulator			0.00613	CFLAR,XIAP
CFHR3		other			0.00613	CFB,ITGAM
polyinosine-polycytidylic acid/polyethylenimine formulation		chemical reagent			0.00613	PMAIP1,XIAP
MIR143-145a		group			0.00613	DMD,TAGLN
PRDM5	-1.375	transcription regulator			0.00713	DKK3,EVL,ISLR2,NOTCH1,PALM2AKAP2,PPP1R12B,SNRNP48
SOD (family)		group			0.00851	CFLAR,PMAIP1,VCAM1	30 (4)
PURA	-0.648	transcription regulator			0.00851	AR,ITGAM,ITGAX
mir-196 (includes others)		microRNA			0.00851	ERG,HOXA7,ZMYND11
KPNB1	-1.122	other			0.00851	MYCL,NCAM1,PMAIP1
FES	0.696	kinase			0.00903	ITGAM,ITGAX
EGFL7	0.234	other			0.00903	NOTCH1,VCAM1
VAMP3		other			0.00903	MYH11,TAGLN
Z-VRPR-FMK		chemical - protease inhibitor			0.00903	CFLAR,LAMP2
edelfosine		chemical drug			0.00903	AR,ERG
2-deoxy-D-ribose		chemical - endogenous mammalian			0.00903	CIITA,LONP1
HISTONE (family)		group			0.00942	CIITA,DKK3,FHL5,NOD2
PI-103		chemical drug			0.01	CFLAR,PMAIP1,XIAP
Cyp2c23	-0.787	enzyme			0.01	ITGAM,PLXDC2,TIMD4
SLC6A3	0.23	transporter			0.01	CLSTN1,GRIA1,NTS
mir-451 (includes others)		microRNA			0.0117	ABI1,TFRC,ZNF148
erastin		chemical drug			0.0117	GCLC,LAMP2,TFRC
acetate		chemical - endogenous mammalian			0.0117	ACTG1,MCM4,PPARGC1A
flavokawain B		chemical - endogenous non-mammalian			0.0124	AR,XIAP
pyrvinium		chemical drug			0.0124	AR,CSNK1A1
DGAT2	-0.645	enzyme			0.0124	ACACA,GPAM
TMTC3	-0.605	enzyme			0.0124	EIF2AK3,FAM3C
MED28	-0.39	other			0.0124	MYH11,TAGLN
miR-519a-3p (and other miRNAs w/seed AAGUGCA)		mature microRNA			0.0124	ABCG2,AR
SNAP23	-0.797	transporter			0.0124	MYH11,TAGLN
casticin		chemical - endogenous non-mammalian			0.0124	CFLAR,XIAP
VCAM1	-2.951	transmembrane receptor			0.0124	ABCG2,VCAM1
3-hydroxyanthranilic acid		chemical - endogenous mammalian			0.0124	RORC,VCAM1
echinacoside		chemical reagent			0.0124	GCLC,SMAD2
SCN9A		ion channel			0.0128	OSBPL6,RAPH1,RNF112,STRIP2,VAV3
SUCNR1	-0.212	G-protein coupled receptor			0.0135	ITGB1,LAMA2,LAMB1
PLIN1	0.022	other			0.0135	ABHD5,ACACA,ITGAX
TP53COR1		other			0.0135	CFLAR,KAT5,PMAIP1
NCD-38		chemical reagent			0.0135	EIF2AK3,PIK3R3,PPP1R15A
(1S,2R)-NCL-1		chemical reagent			0.0135	EIF2AK3,PIK3R3,PPP1R15A
G-1		chemical reagent			0.014	AR,BTC,PAQR7,PTX3
KLF9	-0.7	transcription regulator			0.0154	GHR,PMAIP1,PPP1R15A
miR-293-5p (and other miRNAs w/seed CUCAAAC)		mature microRNA			0.0154	AKAP6,KLF15,TAGLN
gefitinib		chemical drug			0.0156	ANO9,CCAR1,CFLAR,GHR,MMP15,NOTCH1,PIK3CA,PPP2R2B,RBL1,SPRED2,VILL
ganglioside GM3		chemical - endogenous mammalian			0.0163	CSK,VCAM1
N-CADHERIN (family)		group			0.0163	AKT3,VCAM1
CHCHD5	-1.489	other			0.0163	ACACA,PPARGC1A
miR-217-5p (and other miRNAs w/seed ACUGCAU)		mature microRNA			0.0163	ACACA,PPARGC1A
OCT4/NANOG (complex)		complex			0.0163	RIF1,TRIM24
LPA		other			0.0163	GHR,VCAM1
DIABLO	0.145	other			0.0163	CFLAR,XIAP
CCL-34		chemical reagent			0.0163	ITGAM,ITGAX
chlorpyrifos		chemical toxicant			0.0163	ABCG2,NTS
benzoic acid		chemical - endogenous mammalian			0.0163	ITGAM,ITGAX
theaflavin		chemical - endogenous non-mammalian			0.0163	AR,VCAM1
N-(3-(aminomethyl)benzyl)acetamidine		chemical reagent			0.0168	BIRC6,BLK,CFLAR,ITGB1
RHBDF2	0.175	other			0.0176	BPTF,DDX3X,GRIN2D
miR-186-5p (miRNAs w/seed AAAGAAU)		mature microRNA			0.0176	CTDSPL,FGR,LTBP2
TNFRSF11A	0.742	transmembrane receptor			0.0176	AKAP13,MME,VCAM1
digoxin		chemical drug			0.0183	ACACA,AR,DAPK2,MCM4
CCK		other			0.0198	CFLAR,PENK,XIAP
EPHX2	0.132	enzyme			0.0198	NOTCH1,TAGLN,VCAM1
ANGPTL3		growth factor			0.0198	ACACA,PRKAA2,TNFRSF11B
SCH772984		chemical drug			0.0198	PLXDC2,RIF1,TREM2
C8 (complex)		complex			0.0206	CFLAR,VCAM1
DKK3	-6.591	cytokine			0.0206	MYH11,TAGLN
ANGPTL8	-0.571	other			0.0206	ACACA,PRKAA2
ENDOG	-0.036	enzyme			0.0206	ACACA,EIF2AK3
TIP60 (complex)		complex			0.0206	MCM4,RBL1
VWF	0.406	other			0.0206	MYH11,TAGLN
ABCC4		transporter			0.0206	ABCG2,PDE3A
PKN1	1.637	kinase			0.0206	MYH11,TAGLN
ZNF567-DT		other			0.0206	DCLK1,EIF2AK3
19,20-epoxydocosapentaenoic acid		chemical - endogenous mammalian			0.0206	TAGLN,ZEB2
C7	-0.331	other			0.0206	CFLAR,VCAM1
poloxamer		chemical reagent			0.0206	DMD,MLYCD
aminooxyacetic acid		chemical reagent			0.0206	ATF1,PMAIP1
flufenamic acid		chemical drug			0.0206	AR,VCAM1
polyphosphate		chemical - endogenous mammalian			0.0206	ITGAM,VCAM1
ATN1	0.359	transcription regulator			0.0222	CHUK,EVL,FBXW7,GAS7,HPCAL1,LTBP2,PENK,TUBA4A
CCM2	-0.401	other			0.0222	ALDH1A2,MYH11,TAGLN
ZNF148	-1.518	transcription regulator			0.0222	DEPTOR,ITGAM,PTX3
LILRB1		transmembrane receptor			0.0222	DEPTOR,FGFR3,ITGB1
RYR1	-2.623	ion channel			0.0233	AFG3L2,MLYCD,PPARGC1A,PRKAA2
S-nitrosoglutathione		chemical toxicant			0.0233	ITGAM,ITGB1,VCAM1,XIAP
mir-515 (includes others)		microRNA			0.0248	AR,KHSRP,ZEB2
NQO2	0.079	enzyme			0.0253	CFLAR,XIAP
THAP11	0.159	transcription regulator			0.0253	ATL3,LCP1
MRPS5	-4.175	other			0.0253	BCKDHA,KLF15
DAZ2		other			0.0253	PRDM14,TET1
ADCY7	-1.572	enzyme			0.0253	CHUK,IL1RL1
perifosine		chemical drug			0.0253	CFLAR,XIAP
calmidazolium		chemical drug			0.0253	NCAM1,VCAM1
SU1498		chemical drug			0.0253	TNFRSF11B,VCAM1
ricinoleic acid		chemical - endogenous non-mammalian			0.0254	VCAM1
15-deoxy-delta-12-14 prostaglandin D2		chemical - endogenous mammalian			0.0254	ITGAM
17-phenyl-18,19,20-trinor-prostaglandin d2		chemical reagent			0.0254	ITGAM
15S-methyl-prostaglandin d2		chemical reagent			0.0254	ITGAM
16,16-dimethyl-prostaglandin d2 (15R)		chemical reagent			0.0254	ITGAM
KATP CHANNEL (family)		group			0.0254	PPARGC1A
anti-miR-27b-3p inhibitor		chemical reagent			0.0254	VAV3
anti-miR-340-5p inhibitor		chemical reagent			0.0254	VAV3
PD318088		chemical drug			0.0254	TREM2
vacuolin-1		chemical drug			0.0254	ITGAM
ARVib-30		chemical reagent			0.0254	AR
ARVib-11		chemical reagent			0.0254	AR
miR-373 inhibitor		chemical reagent			0.0254	PIK3CA
flavokawain C		chemical - endogenous non-mammalian			0.0254	CFLAR
methyl jasmonate		chemical - endogenous non-mammalian			0.0254	XIAP
naphthyridine azaquinolone		chemical reagent			0.0254	HTT
ABLIM2	2.413	other			0.0254	TAGLN
xanthine derivative CB002 analog 7		chemical reagent			0.0254	PMAIP1
xanthine derivative CB002 analog 9		chemical reagent			0.0254	PMAIP1
xanthine derivative CB002 analog 5		chemical reagent			0.0254	PMAIP1
xanthine derivative CB002 analog 11		chemical reagent			0.0254	PMAIP1
xanthine derivative CB002 analog 3		chemical reagent			0.0254	PMAIP1
xanthine derivative CB002 analog 10		chemical reagent			0.0254	PMAIP1
xanthine derivative CB002 analog 2		chemical reagent			0.0254	PMAIP1
xanthine derivative CB002 analog 8		chemical reagent			0.0254	PMAIP1
xanthine derivative CB002 analog 6		chemical reagent			0.0254	PMAIP1
xanthine derivative CB002		chemical reagent			0.0254	PMAIP1
branaplam		chemical drug			0.0254	HTT
9-hydroxybenzo(a)pyrene		chemical toxicant			0.0254	UGT1A1
cis-4,5-dihydroxy-4,5-dihydrobenzo(a)pyrene		chemical toxicant			0.0254	UGT1A1
6-hydroxybenzo(a)pyrene		chemical toxicant			0.0254	UGT1A1
etalocib		chemical drug			0.0254	ITGAM
1-hydroxybenzo(a)pyrene		chemical toxicant			0.0254	UGT1A1
trans-4,5-dihydroxy-4,5-dihydrobenzo(a)pyrene		chemical toxicant			0.0254	UGT1A1
NA/K ATPASE (family)		group			0.0254	GRIA1
RYR (family)		group			0.0254	KCNJ2
ARF (family)		group			0.0254	DROSHA
GLUTATHIONE PEROXIDASE (family)		group			0.0254	CFLAR
3-TYP		chemical reagent			0.0254	VCAM1
F3/F7/F10 (complex)		complex			0.0254	F2
MAX/MYC (complex)		complex			0.0254	CFLAR
MEF2C,D:PPARGC1A		complex			0.0254	PPARGC1A
SREBP1A,1C:NF-Y:GPAM gene		complex			0.0254	GPAM
NPM1:TFAP2A homodimer:HSPD1 gene		complex			0.0254	HSPD1
BMAL1:CLOCK,NPAS2:KLF15 gene		complex			0.0254	KLF15
CREB:CRTC1,2,3:PPARGC1A gene		complex			0.0254	PPARGC1A
RUNX1:CBFB:ESR1:estrogen:GPAM gene		complex			0.0254	GPAM
RUNX1:CBFB:ELF,ELF2,PAX5:BLK gene		complex			0.0254	BLK
RUNX3:CBFB:RORC gene		complex			0.0254	RORC
DREAM complex:RBL1 gene		complex			0.0254	RBL1
MECP2:MEF2C gene		complex			0.0254	MEF2C
ATF4:PPP1R15A gene		complex			0.0254	PPP1R15A
GCLC gene:AcK-NFE2L2:CREBBP, EP300		complex			0.0254	GCLC
AMG-9810		chemical reagent			0.0254	PPARGC1A
NR1D1:heme:Corepressors:PPARGC1A gene		complex			0.0254	PPARGC1A
PAX8-AS1		other			0.0254	GNB1
Ces1b/Ces1c		enzyme			0.0254	GHR
THAP1	-1.758	transcription regulator			0.0254	CCAR1
USP20	0.604	peptidase			0.0254	VCAM1
MYH7B	1.274	other			0.0254	GRIA1
RBMY1A1 (includes others)		other			0.0254	AR
ABLIM3	0.196	other			0.0254	TAGLN
TMPRSS2		peptidase			0.0254	ERG
CEP78	-1.422	other			0.0254	CCP110
LINC01554		other			0.0254	G3BP2
DHODH	-0.14	enzyme			0.0254	CFLAR
CHMP4C	-0.911	other			0.0254	DEPTOR
SFTA1P		other			0.0254	TPM4
EIF3 (complex)		complex			0.0254	XIAP
abiraterone acetate		chemical drug			0.0254	AR
PF-431396		chemical drug			0.0254	ITGB1
AZD1981		chemical drug			0.0254	ITGAM
mapatumumab		biologic drug			0.0254	CFLAR
ataluren		chemical drug			0.0254	XPC
ARRY-424704		chemical drug			0.0254	TREM2
afuresertib		chemical drug			0.0254	CBLB
PSMD9	0.227	transcription regulator			0.0254	SMAD2
PSMA7	-0.061	peptidase			0.0254	AR
SYT9	-0.607	transporter			0.0254	STXBP5
PPP1R9A	-1.145	other			0.0254	GRIA1
AFAP1	-0.083	other			0.0254	ITGB1
EIF5B	-2.388	translation regulator			0.0254	XIAP
TRAK2	-6.421	transporter			0.0254	KCNJ2
miR-155-3p (miRNAs w/seed UCCUACA)		mature microRNA			0.0254	AR
miR-223-5p (miRNAs w/seed GUGUAUU)		mature microRNA			0.0254	AR
mir-448		microRNA			0.0254	AR
mir-567		microRNA			0.0254	AR
miR-92a-2-5p (miRNAs w/seed GGUGGGG)		mature microRNA			0.0254	AR
miR-488-5p (miRNAs w/seed CCAGAUA)		mature microRNA			0.0254	AR
miR-29a-5p (miRNAs w/seed CUGAUUU)		mature microRNA			0.0254	AR
miR-93-3p (miRNAs w/seed CUGCUGA)		mature microRNA			0.0254	AR
mir-544 (includes others)		microRNA			0.0254	AR
miR-548av-5p (and other miRNAs w/seed AAAGUAC)		mature microRNA			0.0254	ABCG2
mir-584 (includes others)		microRNA			0.0254	PHACTR1
miR-1273h-5p (and other miRNAs w/seed UGGGAGG)		mature microRNA			0.0254	AR
miR-129-1-3p (and other miRNAs w/seed AGCCCUU)		mature microRNA			0.0254	AR
miR-767 (and other miRNAs w/seed GCACCAU)		mature microRNA			0.0254	AR
mir-631		microRNA			0.0254	AR
miR-744-3p (miRNAs w/seed UGUUGCC)		mature microRNA			0.0254	AR
miR-876-3p (miRNAs w/seed GGUGGUU)		mature microRNA			0.0254	AR
mir-198		microRNA			0.0254	CCNT1
miR-367-5p (miRNAs w/seed CUGUUGC)		mature microRNA			0.0254	AR
mir-552		microRNA			0.0254	AR
miR-493-5p (miRNAs w/seed UGUACAU)		mature microRNA			0.0254	MEF2C
mir-887		microRNA			0.0254	PLD2
miR-709 (and other miRNAs w/seed GAGGCAG)		mature microRNA			0.0254	MYCL
mir-586		microRNA			0.0254	AR
miR-486-3p (and other miRNAs w/seed GGGGCAG)		mature microRNA			0.0254	AR
MIR3619		microRNA			0.0254	PLD2
SERPINB8	0.053	other			0.0254	ITGAX
CCT3	-0.089	other			0.0254	HTT
galeterone		chemical drug			0.0254	AR
GJA5	-0.41	transporter			0.0254	REN
refametinib		chemical drug			0.0254	TREM2
TAK 733		chemical drug			0.0254	TREM2
HTRA2	0.482	peptidase			0.0254	XIAP
dimethylcurcumin		chemical drug			0.0254	AR
isorhapontigenin		chemical - endogenous non-mammalian			0.0254	XIAP
aloperine		chemical reagent			0.0254	CFLAR
KIF11	-1.193	other			0.0254	CFLAR
SUPT4H1	0.055	transcription regulator			0.0254	HTT
Ikzf1		other			0.0254	FGFR3
CHL1	-2.134	other			0.0254	NCAM1
TGFBRAP1	0.092	other			0.0254	SMAD2
RNF125	-1.287	enzyme			0.0254	TRIM14
Rnf125		other			0.0254	TRIM14
B4GALT5	-1.057	enzyme			0.0254	NOTCH1
VPS18	0.767	other			0.0254	ITGB1
HOXB6	0.294	transcription regulator			0.0254	REN
ABLIM1	-0.799	other			0.0254	TAGLN
LNCRNA-IUR		other			0.0254	TFRC
SLC25A10	0.22	transporter			0.0254	ACACA
teprotumumab		biologic drug			0.0254	PTX3
sotagliflozin		chemical drug			0.0254	STING1
direct black 38		chemical reagent			0.0254	TFRC
chemotherapy/tretinoin		chemical drug			0.0254	KAT2B
Scgb1b27 (includes others)		other			0.0254	F2
RNF13	-0.406	enzyme			0.0254	STING1
CT45A1 (includes others)		other			0.0254	SULF2
MFF	-0.528	other			0.0254	PPARGC1A
RTC14		chemical reagent			0.0254	XPC
mir-5701 (includes others)		microRNA			0.0254	VCAM1
BZ16		chemical reagent			0.0254	XPC
HADHB	-0.496	enzyme			0.0254	REN
kava extract		chemical reagent			0.0254	AR
kurarinone		chemical reagent			0.0254	CFLAR
diclofenac/hyaluronic acid		chemical drug			0.0254	CFLAR
VNPT55		chemical reagent			0.0254	AR
BI 847325		chemical drug			0.0254	TREM2
droxinostat		chemical reagent			0.0254	CFLAR
amurensin G		chemical reagent			0.0254	CFLAR
VPC-14228		chemical drug			0.0254	AR
PRTX-100 protein		biologic drug			0.0254	IQANK1
VPC-14449		chemical reagent			0.0254	AR
3-hydroxy-2-methylpropanoic acid		chemical - endogenous mammalian			0.0254	HIBCH
FR 49175		chemical toxicant			0.0254	PAFAH1B3
phenidone		chemical drug			0.0254	REN
SA 4503		chemical drug			0.0254	GRIA1
dihydrexidine		chemical drug			0.0254	GRIA1
phytosphingosine		chemical - endogenous mammalian			0.0254	CLDN1
vamorolone		chemical drug			0.0254	DMD
zosuquidar		chemical drug			0.0254	MTHFR
3-hydroxybenzo(a)pyrene		chemical toxicant			0.0254	UGT1A1
bisindolylmaleimide III		chemical - kinase inhibitor			0.0254	CFLAR
4-cresol		chemical toxicant			0.0254	ITGAM
FGFR3-TACC3		fusion gene/product			0.0254	PPARGC1A
deuterated enzalutamide		chemical drug			0.0254	AR
compound C108		chemical reagent			0.0254	G3BP2
2-((2,4-dihydroxyphenyl)sulfonyl)isoindoline-4,6-diol		chemical drug			0.0254	HIBCH
18-hydroxy-retinoic acid		chemical - endogenous mammalian			0.0254	ITGAX
5,6-epoxy-retinoic acid		chemical - endogenous mammalian			0.0254	ITGAX
alpha 1-antitrypsin Portland		chemical - protease inhibitor			0.0254	ITGAX
oxanthroquinone G01		chemical reagent			0.0254	EIF2AK3
PD 145065		chemical reagent			0.0254	ITGAM
8-phenyltheophylline		chemical reagent			0.0254	ADORA2A
15-(S)-hydroperoxyeicosatetraenoic acid		chemical - endogenous mammalian			0.0254	F2
BX-912		chemical drug			0.0254	ITGAM
adrenosterone		chemical - endogenous mammalian			0.0254	AR
DMD	-22.335	other			0.0256	ACTG1,CDC42BPA,CDH13,DMD,EYA3,LAMP2,MEF2C,PACSIN1,PAMR1,PPARGC1A,SUSD4
CDK8	-0.663	kinase			0.0271	MAGI1,NOTCH1,PRDM14,RBL1
JARID2	0.724	transcription regulator			0.0275	NOTCH1,PPARGC1A,ZEB2
KN-62		chemical drug			0.0275	GRIA1,PPP1R15A,VCAM1
RAF (family)		group			0.0293	MYH11,PMAIP1,PPARGC1A,SPRED2,TAGLN
ALKBH5	0.222	enzyme			0.0299	ABI1,AKAP13,DDX3X,EIF4G3,ITGB1,MYO6,SLC7A8
SLC2A4	0.97	transporter			0.0304	ACACA,GRIA1,PPARGC1A
LATS (family)		group			0.0304	EIF2AK3,NCAM1,TAGLN
CTSV	-0.682	other			0.0305	CLDN1,PENK
2,2',4,4',5,5'-hexabromodiphenyl ether		chemical reagent			0.0305	HOXA7,NTS
ANO1	1.726	ion channel			0.0305	NOTCH1,TAGLN
MGAT1	0.545	enzyme			0.0305	CLDN1,ITGB1
LTB4R2	0.421	G-protein coupled receptor			0.0305	AR,EIF2AK3
KRT19	0.371	other			0.0305	EIF2AK3,NOTCH1
mir-449 (includes others)		microRNA			0.0305	AR,TUBB4B
miR-346 (and other miRNAs w/seed GUCUGCC)		mature microRNA			0.0305	CFLAR,NRIP1
RUVBL2	0.706	transcription regulator			0.0305	MCM4,RBL1
KIF4A	-0.029	other			0.0305	AR,ITGB1
butylhydroxybutylnitrosamine		chemical toxicant			0.0305	BTC,UGT1A1
Z-DEVD-FMK		chemical - protease inhibitor			0.0305	MEF2C,PDZD2
hexamethoxyflavone		chemical toxicant			0.0305	AR,VCAM1
hesperetin		chemical drug			0.0305	NOTCH1,PPARGC1A
FYN	-0.631	kinase			0.0333	GRIA1,NOTCH1,PENK,RORC
MC4R		G-protein coupled receptor			0.0334	GHR,GRIA1,PPARGC1A
mir-143		microRNA			0.0334	NOTCH1,OSBPL8,TAGLN
PKNOX1	-0.23	transcription regulator			0.0334	NOTCH1,PPARGC1A,REN
SOS (family)		group			0.0343	ATP2C1,DAPK2,DDX3X,HIPK3,ITGB1,KIF2A,KIF5B,MAP3K20,NRIP1,PTPN12
SMARCA2	-1.126	transcription regulator			0.0344	CIITA,ITGAM,MEF2C,RBL1,TAGLN
geneticin		chemical toxicant			0.0359	DMD,XPC
embelin		chemical - endogenous non-mammalian			0.0359	CFLAR,XIAP
ulipristal acetate		chemical drug			0.0359	AR,XIAP
bazedoxifene		chemical drug			0.0359	FUT8,XIAP
(R)-2-(4-chlorophenyl)-2-oxo-1-phenylethyl quinoline-2-carboxylate		chemical reagent			0.0359	HOMER1,TREM2
gossypin		chemical - endogenous non-mammalian			0.0359	CFLAR,XIAP
IL8R (family)		group			0.0359	ITGAM,ITGAX
CAV3	0.16	enzyme			0.0359	DMD,KCNJ2
SERPINB3		other			0.0359	ITGAM,TREM2
RGFP966		chemical reagent			0.0359	MME,PPARGC1A
C9		other			0.0359	CFLAR,VCAM1
quinacrine		chemical drug			0.0359	CFLAR,XIAP
STO-609		chemical - kinase inhibitor			0.0359	GRIA1,VCAM1
salinosporamide A		chemical drug			0.0366	CFLAR,PPP1R15A,XIAP
CA4	-0.382	enzyme			0.0366	EIF2AK3,SLC10A6,TGM3
ACLY	-0.357	enzyme			0.0366	ACACA,GPAM,PPARGC1A
CHADL	0.361	other			0.0366	MEF2C,PTX3,VCAM1
acteoside		chemical - endogenous non-mammalian			0.0366	GCLC,HIPK2,SMAD2
E2F4	-0.077	transcription regulator			0.0367	ATRX,CSDE1,DBF4,DROSHA,MCM4,PPARGC1A,PPP2R2B,RBL1,SMURF2,WDR76,XPC
H2AX		transcription regulator			0.0379	GATA5,PLEKHA6,PPARGC1A,TMCC1
sorafenib		chemical drug			0.0382	ABCG2,CFLAR,NOTCH1,PPP1R15A,TFRC
ADAMTS18		peptidase			0.0399	COL4A6,LTBP2,MMP15
HEIH		other			0.0399	CACNB2,HSPA2,MEF2C
D-alpha-tocopheryl succinate		chemical reagent			0.0418	PMAIP1,XIAP
EVP 4593		chemical reagent			0.0418	ITGB1,KAT2B
(±)-2-hydroxyoleic acid		chemical drug			0.0418	CAMP,PRKACA
ATRIAL NATRIURETIC PEPTIDE (family)		group			0.0418	NPR2,PDE3A
PLA2G2D		other			0.0418	ITGAM,ITGAX
WNT16	-0.44	other			0.0418	MYH11,TAGLN
SOX5	-2.322	transcription regulator			0.0418	FGFR3,RORC
Ces2a		enzyme			0.0418	ACACA,ITGAX
LAMA2	-1.661	other			0.0418	CSK,LAMA2
capivasertib		chemical drug			0.0418	AR,TREM2
COMPLEMENT (complex)		complex			0.0418	ITGAM,VCAM1
tetrathiomolybdate		chemical drug			0.0418	ITGAM,VCAM1
Fe2+		chemical - endogenous mammalian			0.0418	GCLC,TFRC
SRC (family)		group			0.0429	FGR,IL27,SMAD2,VCAM1
FOCAL ADHESION KINASE (family)		group			0.0433	PRRX1,TAGLN,VCAM1
H2BC17		other			0.0433	OSBPL6,PPP6R3,TNIK
resolvin E1		chemical - endogenous mammalian			0.047	CAMP,TAGLN,TNFRSF11B
NCOA4	-0.49	transcription regulator			0.047	AR,FGFR3,MME
KMT2A	-1.016	enzyme			0.0477	DEPTOR,ELF2,HOXA7,NEK1,TET1,ZMYND11
dabrafenib		chemical drug			0.0479	AR,ITGAX
DUSP16	-0.489	phosphatase			0.0479	RORC,VCAM1
CXCL5	-1.179	cytokine			0.0479	ITGAM,PPARGC1A
SAT1	-0.02	enzyme			0.0479	PPARGC1A,PRKAA2
USP4	0.22	peptidase			0.0479	ADORA2A,RORC
PAWR	-0.944	transcription regulator			0.0479	CCAR1,XIAP
ZYX	-0.201	other			0.0479	HIPK2,ITGB1
noscapine		chemical drug			0.0479	CFLAR,XIAP
N-acetylglucosamine		chemical - endogenous mammalian			0.0479	RORC,SMAD2
mir-145		microRNA			0.0481	EIF2AK3,HSPD1,MYH11,TAGLN
DIO2		enzyme			0.0492	HS3ST5,KLF15,NTS,PENK,PHF1,PPARGC1A,SBNO2,SLC10A6
